# Supplementary material for: Smoking prevalence and attributable disease burden in 195 countries and territories, 1990–2015: a systematic analysis from the Global Burden of Disease Study 2015
Source: PubMed Central journal article supplement (PMC5439023; doi:10.1016/s0140-6736(17)30819-x), 2017-05-13
Supplement: mmc1.pdf [file mmc1.pdf]

# THE LANCET

## Supplementary appendix

This appendix formed part of the original submission and has been peer reviewed. We post it as supplied by the authors.

Supplement to: GBD 2015 Tobacco Collaborators. Smoking prevalence and attributable disease burden in 195 countries and territories, 1990–2015: a systematic analysis from the Global Burden of Disease Study 2015. *Lancet* 2017; published online April 5. [http://dx.doi.org/10.1016/S0140-6736\(17\)30819-X](http://dx.doi.org/10.1016/S0140-6736(17)30819-X).

## **Supplementary Material**

### **Estimating smoking prevalence and attributable disease burden in 195 countries and territories, 1990-2015: a systematic analysis from the Global Burden of Disease Study 2015.**

GBD 2015 Tobacco Collaborators

## Contents

|                                                          |    |
|----------------------------------------------------------|----|
| Supplemental Figures and Tables .....                    | 3  |
| Geographies estimated and Socio-demographic Index.....   | 5  |
| Age-standardisation.....                                 | 5  |
| Data and modeling flowchart .....                        | 5  |
| Inclusion criteria.....                                  | 5  |
| Data sources.....                                        | 5  |
| Consumption.....                                         | 5  |
| Prevalence.....                                          | 6  |
| Smoking Impact Ratio .....                               | 6  |
| Burden.....                                              | 6  |
| Relative risk.....                                       | 6  |
| Consumption data preparation .....                       | 6  |
| Consumption modeling.....                                | 7  |
| Smoking prevalence data preparation.....                 | 7  |
| Data extraction .....                                    | 7  |
| Crosswalking .....                                       | 7  |
| Smoking prevalence modeling.....                         | 8  |
| Smoking Impact Ratio calculation.....                    | 9  |
| Estimating attributable burden.....                      | 9  |
| Assessment of risk-outcome pairs .....                   | 9  |
| Relative risk.....                                       | 9  |
| Population Attributable Fraction (PAF) calculation ..... | 9  |
| Attributable burden calculation.....                     | 9  |
| Decomposition .....                                      | 10 |
| Supplemental results .....                               | 10 |
| References .....                                         | 11 |

## Supplemental Figures and Tables

**Figure S1. Estimation flowchart including data inputs, database inputs, modeling processes, and results.**

**Figure S2. Prevalence of daily smoking for men (A) and women (B), aged 15-19, in 2015.** ATG=Antigua and Barbuda; VCT= Saint Vincent and the Grenadines; BRB=Barbados; COM=Comoros; DMA=Dominica; GRD=Grenada; MDV=Maldives; MUS=Mauritius; LCA=Saint Lucia; TTO=Trinidad and Tobago; TLS=Timor-Leste; SYC=Seychelles; W Africa=Western Africa; E Med.=Eastern Mediterranean; MLT=Malta; SGP=Singapore; MHL=Marshall Islands; KIR=Kiribati; SLB=Solomon Islands; FSM=Federated States of Micronesia; VUT=Vanuatu; WSM=Samoa; FJI=Fiji; TON=Tonga.

**Figure S3. Percent change in age-standardized smoking prevalence from 1990 to 2015, for men (A) and women (B).** Countries without a statistically significant change from 1990 to 2015 are indicated in grey.

**Figure S4. Prevalence of daily smoking across birth cohorts over time, at the global level and by super region, for men (A) and women (B).** Birth cohorts are colour-coded by five-year intervals, with the most recent birth cohort in red (2005) to the least recent birth cohort in dark blue (1910). Each dot represents the prevalence of daily smoking for a given birth cohort and age group.

**Figure S5. Leading 30 level 3 global causes for DALYs attributable to smoking for males (A) and females (B), 1990, 2005, and 2015 with percentage change in the number of DALYs, and all-age, and age-standardised rates.** Causes are connected by arrows between time periods. For the time period 1990 to 2005 and for 2005 to 2015, three measures of change are shown: percent change in the number of DALYs, percent change in the all-age DALY rate and percent change in the age-standardised DALY rate. Changes that are statistically significant are shown in bold. DALYs=disability-adjusted life-years.

**Figure S6. Rankings of smoking as a risk factor for all-cause, all-age attributable DALYs for both sexes combined in 1990 (A) and 2005 (B).** DALYs = disability-adjusted life-years. ATG=Antigua and Barbuda; VCT= Saint Vincent and the Grenadines; BRB=Barbados; COM=Comoros; DMA=Dominica; GRD=Grenada; MDV=Maldives; MUS=Mauritius; LCA=Saint Lucia; TTO=Trinidad and Tobago; TLS=Timor-Leste; SYC=Seychelles; W Africa=Western Africa; E Med.=Eastern Mediterranean; MLT=Malta; SGP=Singapore; MHL=Marshall Islands; KIR=Kiribati; SLB=Solomon Islands; FSM=Federated States of Micronesia; VUT=Vanuatu; WSM=Samoa; FJI=Fiji; TON=Tonga.

**Table S1. Geographies estimated, SDI value, and SDI level.** SDI = Socio-demographic Index. SDI values and levels reflect 2015 estimates for the component factors: total fertility rate, mean educational attainment, and lag-distributed income per capita.

**Table S2. Citations for sources used in relative risk estimation.**

**Table S3. Number of data points extracted for each frequency-type indicator.** Data points are location-, year-, age-, sex-specific. Columns are different frequencies of tobacco use captured. Rows are different types of tobacco captured.

**Table S4. Crosswalking coefficients, model fit, and number of data points using each crosswalk.** Data points are location-, year-, age-, sex-specific. \*Used to crosswalk data from sources that did not have



data on any of the five other frequency-type combinations with crosswalk models with R-squared values > 0.8.

**Table S5. Strength of evidence supporting a causal relationship between smoking and 38 included outcomes.** Prospective observational studies with a significant association in the opposite direction is missing if there were no prospective observational studies or the strength of evidence was assessed through a pooled analysis. Biologic plausibility indicates whether any biological or mechanistic pathway exists that could potentially explain the relationship between smoking and the outcome. Analogy indicates whether smoking is associated with another outcome from the same category and whether any evidence exists that smoking can cause the current outcome through the same biological or mechanistic pathway.

**Table S6. Citations for evidence used in assessing causal relationships between smoking and 38 included outcomes.**

**Table S7. Relative-risk estimates, by age and sex, for 38 included outcomes.**

**Table S8. All-cause all-age (30+) deaths and DALYs and all-cause age-standardized mortality and DALY rates (per 100) in 2015 for men and women.** 95% uncertainty intervals are reported in parentheses: (lower, upper).

## Geographies estimated and Socio-demographic Index

Consistent with the protocol of the Global Burden of Disease Study 2015, we estimated smoking prevalence from 1980-2015 for 195 countries and territories (Table S1), both sexes, and 15 five-year age groups (age group 10-14 through age group 80+). We estimated smoking attributable burden for the same 195 countries and territories from 1990-2015, both sexes, and 11 five-year age groups (age group 30-34 through age group 80+). Additionally, we calculated aggregate estimates by geography and level of development. Geographic aggregates (regions, super regions, and global) are consistent with the previously published GBD location hierarchy.<sup>1</sup> Aggregation by level of development used the Socio-demographic Index (SDI) level method used throughout GBD estimation to create five levels of development- high, high-middle, middle, low-middle, and low- to which there is a one-to-one map for all 195 countries and territories presented in this work.

Full details of calculation of SDI level were previously published.<sup>1</sup> Briefly, SDI is a composite indicator including total fertility rate, mean educational attainment, measured as number years of schooling completed among individuals ages 15+, and lag-distributed income per capita. Calculation of the composite indicator followed the methodology used in construction of the Human Development Index.<sup>2</sup> SDI values are included in Table S1, along with the geography's SDI level. SDI levels reflect 2015 values for the component indicators.

## Age-standardisation

For age-standardised rates we used the GBD population standard.<sup>1</sup>

## Data and modeling flowchart

Figure S1 shows the full estimation process, from data inputs to results.

## Inclusion criteria

We included nationally representative survey data sources that captured information on primary tobacco use among individuals over age 10. We included only self-reported smoking data and excluded data from questions asking about others' smoking behaviors. We included data that was collected between 1 January 1980 and 31 December 2015 in any of the 195 geographies included in this study.

For consumption estimation, we included nationally representative supply-side data on tobacco availability from sources covering multiple countries. Data were included if they were collected between 1 January 1960 and 31 December 2015 and covered one of the 195 geographies included in this study.

## Data sources

A complete list of sources is available from the GBD 2015 Data Input Sources Tool (<http://ghdx.healthdata.org/gbd-2015/data-input-sources>).

## Consumption

We estimated country-wide consumption of tobacco as grams per capita using four supply-side data sources: 1) the United Nations Food and Agriculture Organization (FAO),<sup>3</sup> which covered 171 countries and territories from 1961-2013 and reported data as domestic supply in tonnes of tobacco; 2) the US Department of Agriculture (USDA),<sup>4</sup> which covered 153 countries from 1960 to 2005 and reported data as domestic consumption of manufactured cigarettes; 3) Euromonitor,<sup>5</sup> which covered 80 countries from 1998-2015 and reported data as sales of cigarettes including manufactured, roll-your-own, and

illicit sales; and 4) sales data (personal correspondence from Christopher Tan, MBA, September 2013), which covered 18 countries from 1997 to 2012.

### Prevalence

We searched the Global Health Data Exchange (GHDx) database for primary data sources with the keyword “Tobacco Use” on 1 May 2015 and again on 16 February 2016 to ensure all available data sources were captured. Of the 3,318 sources identified in the GHDx, 2,224 sources met inclusion criteria and were included.

In addition to the primary data sources identified through the GHDx, we supplemented with secondary database estimates from the WHO InfoBase Database and International Smoking Statistics Database for sources for which primary data are unavailable. We included 281 sources from the WHO InfoBase and 313 sources from the International Smoking Statistics Database.

### Smoking Impact Ratio

The Smoking Impact Ratio (SIR) is computed using four estimates: 1) lung cancer mortality rates in a reference population of smokers, 2) lung cancer mortality rates in a reference population of never-smokers, 3) lung cancer mortality rates among never smokers in a population of interest, and 4) observed lung cancer mortality rates in a population of interest. We used available prospective cohort studies to estimate values 1, 2, and 3. A list of included prospective cohorts is available in the GBD 2015 Data Input Sources Tool (<http://ghdx.healthdata.org/gbd-2015/data-input-sources>). We used lung cancer mortality rate estimates from GBD 2015 for value 4.<sup>6</sup>

### Burden

Inputs to calculate attributable burden included GBD 2015 deaths and DALYs for the 38 outcomes included in this analysis. Estimates are publically available through the GBD Results Tool: <http://ghdx.healthdata.org/gbd-results-tool>.

### Relative risk

Relative risk estimates were derived from prospective cohort studies. Sources used in relative risk estimation are reported in Table S2.

### Consumption data preparation

To prepare the supply-side tobacco consumption data for modeling, first we converted sources reporting data in units of cigarettes to units of grams of tobacco by equating one cigarette to one gram of tobacco. Next, we transformed all data to per capita estimates using GBD population estimates. Data reported for aggregated former geographies, such as the Soviet Union and the Socialist Federal Republic of Yugoslavia, were split using the ratios derived from four years after dissolution. Since FAO data were reported as availability of tobacco, not as sales or consumption, we assumed that there was noise resulting from compensation for overstock or understock. Since our metric of interest was consumption, we smoothed FAO data by taking a four-year historical average. To enforce consistency between prevalence and consumption, we assumed that grams per daily smoker per day would not exceed 30 and would not be less than five. Data outside these thresholds were considered to be outliers and were dropped. We controlled for differences between sources by crosswalking data from each source to the average of data from other sources paired by country-year. Uncertainty of data was estimated by calculating the standard deviation of data over a 10-year rolling window by source.

## Consumption modeling

We used spatiotemporal Gaussian process regression (ST-GPR) to model supply-side tobacco consumption. We updated the mean function used previously by Ng. et al to the following:

$$m_{g,a,s}(t) = X\beta + h(r_{g,t})$$

where  $h(r_{g,t})$  is a smoothing function for residuals from the mixed effects model that draws strength across geography and time, and  $X\beta$  is the estimate produced by the following mixed effects model, fit using restricted maximum likelihood in R:

$$\log(\text{consumption})_{g,t} = \beta_0 + \beta_1 \text{education}_{g,t} + \alpha_s + \alpha_r + \alpha_g + \epsilon_{g,t}$$

where  $\text{education}_{g,t}$  is the mean years of education completed among individuals over age 15 in geography  $g$  at time  $t$ , and  $\alpha_s$ ,  $\alpha_r$ , and  $\alpha_g$  are super region, region, and geography random intercepts, respectively. The linear model component ( $X\beta$ ) was fit using random effects, but predictions were made based only on the estimated beta coefficients. Differences from the previously published model include a different covariate and a different model specification. We used educational attainment, as opposed to the previously used GDP, based on out-of-sample cross validation analyses. We used spatiotemporal smoothing ( $h(r_{g,t})$ ), as opposed to the previously used region and geography random slopes to better capture the effect of time and incorporate more data in estimating the mean function in data-sparse regions. The ST-GPR method has been described in detail elsewhere.<sup>1</sup>

## Smoking prevalence data preparation

### Data extraction

We extracted primary data from individual-level microdata and survey report tabulations. We extracted data on current tobacco use reported as any combination of frequency of use (daily, occasional, and current, which includes both daily and occasional smokers) and of type of tobacco used (all tobacco including smoked and smokeless, all tobacco excluding cigarettes, smoked tobacco, cigarettes only, manufactured cigarettes, hand-rolled cigarettes, smoked tobacco excluding cigarettes, and smokeless tobacco), resulting in 24 possible combinations for frequency and type.

For microdata, we extracted relevant demographic information, including age, sex, location, and year, as well as survey metadata, including survey weights, primary sampling units, and strata. This information allowed us to tabulate individual-level data in the standard GBD five-year age-sex groups and produce accurate estimates of uncertainty. For survey report tabulations, we extracted data at the most granular age-sex group provided.

### Crosswalking

Our gold-standard smoking prevalence indicator is daily use of smoked tobacco products. All other data points were adjusted to be consistent with this definition. Table S3 shows the number of data points extracted for each indicator. Some sources contained information on more than one frequency-type combination indicator and these sources were used to develop the adjustment coefficient to transform that alternative frequency-type combinations to the gold-standard frequency-type combination of daily use of smoked tobacco. The adjustment coefficient was the beta value derived from the following model:

$$p_{\text{daily-smoked},k} = \beta p_{i,k} + \epsilon_k$$

where  $p_{\text{daily-smoked},k}$  is the prevalence of daily smoking reported in survey  $k$  and  $p_{i,k}$  is the prevalence of an alternative frequency-type combination  $i$  also reported in survey  $k$ . Models with adjusted R-squared values  $> 0.8$  were used in order of their R-squared value. Adjusting for frequency and type simultaneously improved upon the previously published method<sup>7</sup> by taking into account correlation between frequency and type. Five alternative frequency-type combinations had adjusted R-squared values  $> 0.8$ . For other alternative frequencies and types we used the previously published step-wise crosswalk, adjusting for frequency and type independently. Sources only reporting data on occasional use ( $n=202$  data points, 0.2%) were dropped because there was no sufficiently accurate crosswalk available. The estimated regression coefficients used for adjustment and the number of data points using that adjustment are reported in Table S4. Crosswalking models were fit using Stata 13.

We propagated uncertainty at the survey ( $k$ ) level from the crosswalk using the following equation:

$$PE_k = \sigma_\epsilon^2 + X_k^2 \text{var}(\hat{\beta})$$

where  $PE_k$  is the crosswalk prediction error that is added to the sampling variance of the data point,  $\sigma_\epsilon^2$  is the variance of the error,  $X_k^2$  is the squared value of the data being adjusted, and  $\text{var}(\hat{\beta})$  is the variance of the adjustment coefficient.

### Smoking prevalence modeling

We used ST-GPR to model smoking prevalence given the abundance of age and sex-specific data. Full details on the ST-GPR method have been previously published.<sup>1</sup> Briefly, the mean function input to GPR is a complete time series of estimates generated from a mixed effects hierarchical linear model plus weighted residuals smoothed across time, space, and age. The linear model formula, fit separately by sex using restricted maximum likelihood in R, is:

$$\text{logit}(p_{g,a,t}) = \beta_0 + \beta_1 \text{CPC}_{g,t} + \sum_{k=2}^{16} \beta_k I_{A[a]} + \alpha_s + \alpha_r + \alpha_g + \epsilon_{g,a,t}$$

where  $\text{CPC}_{c,t}$  is the tobacco consumption covariate, by geography  $g$  and time  $t$ , described above,  $I_{A[a]}$  is a dummy variable indicating specific age group  $A$  that the prevalence point  $p_{g,a,t}$  captures, and  $\alpha_s$ ,  $\alpha_r$ , and  $\alpha_g$  are super region, region, and geography random intercepts, respectively. Random effects were used in model fitting but were not used in prediction.

We used out-of-sample cross validation for hyperparameter selection for the space (zeta), age (omega), and time (lambda) weights used in spatiotemporal smoothing along with the scale used in Gaussian process regression (details on the effects of different parameters have been previously published). We used a space weight of 0.95 in data-dense countries (at least five years covered in a geography-age-sex group) and space weight of 0.7 in data-sparse countries. The other parameters were consistent across data-density levels: age weight = 1, time weight = 1, and scale = 10.

We minimized out-of-sample root mean squared error (RMSE) in parameter selection, and also assessed the full model fit using RMSE. The in-sample RMSE of the final model was 0.05 and the out-of-sample RMSE was 0.08. The in-sample coverage of the final model was 99.4% and the out-of-sample coverage was 99.8%.

## Smoking Impact Ratio calculation

We calculated SIR for each geography, year, age group, and sex included in attributable burden analysis using the following formula:

$$SIR = \frac{C_{LC} - N_{LC}}{S_{LC}^* - N_{LC}^*} \times \frac{N_{LC}^*}{N_{LC}}$$

where  $C_{LC}$  is the lung cancer mortality rate specific to the age-sex-geography-year of interest,  $N_{LC}$  is the age- sex- geography- year-specific lung cancer mortality rate of never-smokers in the population of interest,  $S_{LC}^*$  is the lung cancer mortality rate in a reference population of smokers,  $N_{LC}^*$  is the lung cancer mortality rate in a reference population of never-smokers. Additional details on SIR calculation can be found elsewhere.<sup>8</sup>

## Estimating attributable burden

### Assessment of risk-outcome pairs

We included outcomes based on the strength of available evidence supporting a causal relationship. Table S6 reports the strength of evidence for included outcomes and the exposure metric (5-year lagged prevalence or SIR) used for each outcome. Table S7 reports the sources used in evaluating strength of included outcomes.

### Relative risk

Table S8 reports relative risk estimates and uncertainty for the 38 outcomes included in analysis, by age and sex where applicable. Sources used in generating relative risk estimates are cited in the GBD 2015 Data Input Sources Tool (<http://ghdx.healthdata.org/gbd-2015/data-input-sources>).

### Population Attributable Fraction (PAF) calculation

We calculated population attributable fractions (PAFs) based on exposure estimates, relative risk estimates, and the theoretical minimum risk exposure level (TMREL), using the following formula for a dichotomous exposure:

$$PAF_{oasgt} = \frac{\sum_{x=0}^1 RR_{oasg}(x)P_{asgt}(x) - RR_{oasg}(TMREL_{as})}{\sum_{x=0}^1 RR_{oasg}(x)P_{asgt}(x)}$$

where  $PAF_{oasgt}$  is the population attributable fraction for outcome  $o$ , age group  $a$ , sex  $s$ , geography  $g$ , and year  $t$ .  $RR_{oasg}(x)$  is the relative risk as a function of exposure level  $x$  for outcome  $o$ , age group  $a$ , sex  $s$ , and geography  $g$ ;  $P_{asgt}(x)$  is the proportion of the population with exposure level  $x$  for age group  $a$ , sex  $s$ , geography  $g$ , and year  $t$ ;  $TMREL_{as}$  is the TMREL for age group  $a$ , and sex  $s$ . The TMREL for smoking is zero, meaning nobody in the population smokes. Additional details on PAF calculation are published elsewhere.<sup>1</sup>

### Attributable burden calculation

We calculated smoking attributable burden using the following formula for DALYs:

$$AB_{asgt} = \sum_{o=1}^{38} DALY_{oasgt} * PAF_{oasgt}$$

and deaths:

$$AB_{asgt} = \sum_{o=1}^{38} deaths_{oasgt} * PAF_{oasgt}$$

where  $AB_{asgt}$  is the total smoking attributable burden (as either DALYs or deaths) for a given age group  $a$ , sex  $s$ , geography  $g$ , time  $t$ , calculated from the sum of  $deaths * PAF$  for outcomes  $o$  one through 38. Further details on calculation of attributable burden are published elsewhere.<sup>1</sup>

### Decomposition

For the decomposition analysis, we used the methods developed by Das Gupta to decompose changes in total percent change in DALYs from 2005-2015 by SDI level due to changes in population structure (population ageing and population growth), risk-deleted DALY rate, which is the background DALY rate observed if smoking levels were at their TMREL, and risk exposure. Details on the decomposition methodology and implementation have been reported elsewhere.<sup>1</sup>

### Supplemental results

Figure S2 shows age-specific smoking prevalence for men and women ages 20-24. Figure S4 shows cohort plots by super region.

## References

- 1 Forouzanfar MH, Afshin A, Alexander LT, *et al.* Global, regional, and national comparative risk assessment of 79 behavioural, environmental and occupational, and metabolic risks or clusters of risks, 1990–2015: a systematic analysis for the Global Burden of Disease Study 2015. *The Lancet* 2016; **388**: 1659–724.
- 2 UNDP, editor. Work for human development. New York, NY: United Nations Development Programme, 2015.
- 3 FAOSTAT. <http://faostat.fao.org/beta/en/#data> (accessed Nov 8, 2016).
- 4 USDA Global Tobacco Database 1960-2005 | GHDx. <http://ghdx.healthdata.org/record/usda-global-tobacco-database-1960-2005> (accessed Nov 8, 2016).
- 5 Cigarette industry market research, statistics, and market share. <http://www.euromonitor.com/cigarettes?CountryCode=96650&IndustryCode=null&ContentType=null&ReportType=null&SortBy=1&PageNumber=0&PageSize=50&PageType=2> (accessed Nov 8, 2016).
- 6 Wang H, Naghavi M, Allen C, *et al.* Global, regional, and national life expectancy, all-cause mortality, and cause-specific mortality for 249 causes of death, 1980–2015: a systematic analysis for the Global Burden of Disease Study 2015. *The Lancet* 2016; **388**: 1459–544.
- 7 Ng M, Freeman MK, Fleming TD, *et al.* Smoking Prevalence and Cigarette Consumption in 187 Countries, 1980-2012. *JAMA* 2014; **311**: 183–92.
- 8 Ezzati M, Lopez AD. Smoking and oral tobacco use. *Comparative Quantification of Health Risks, WHO Publications* 2004. <http://citeseerx.ist.psu.edu/viewdoc/download?doi=10.1.1.378.3697&rep=rep1&type=pdf#page=907> (accessed Nov 8, 2016).



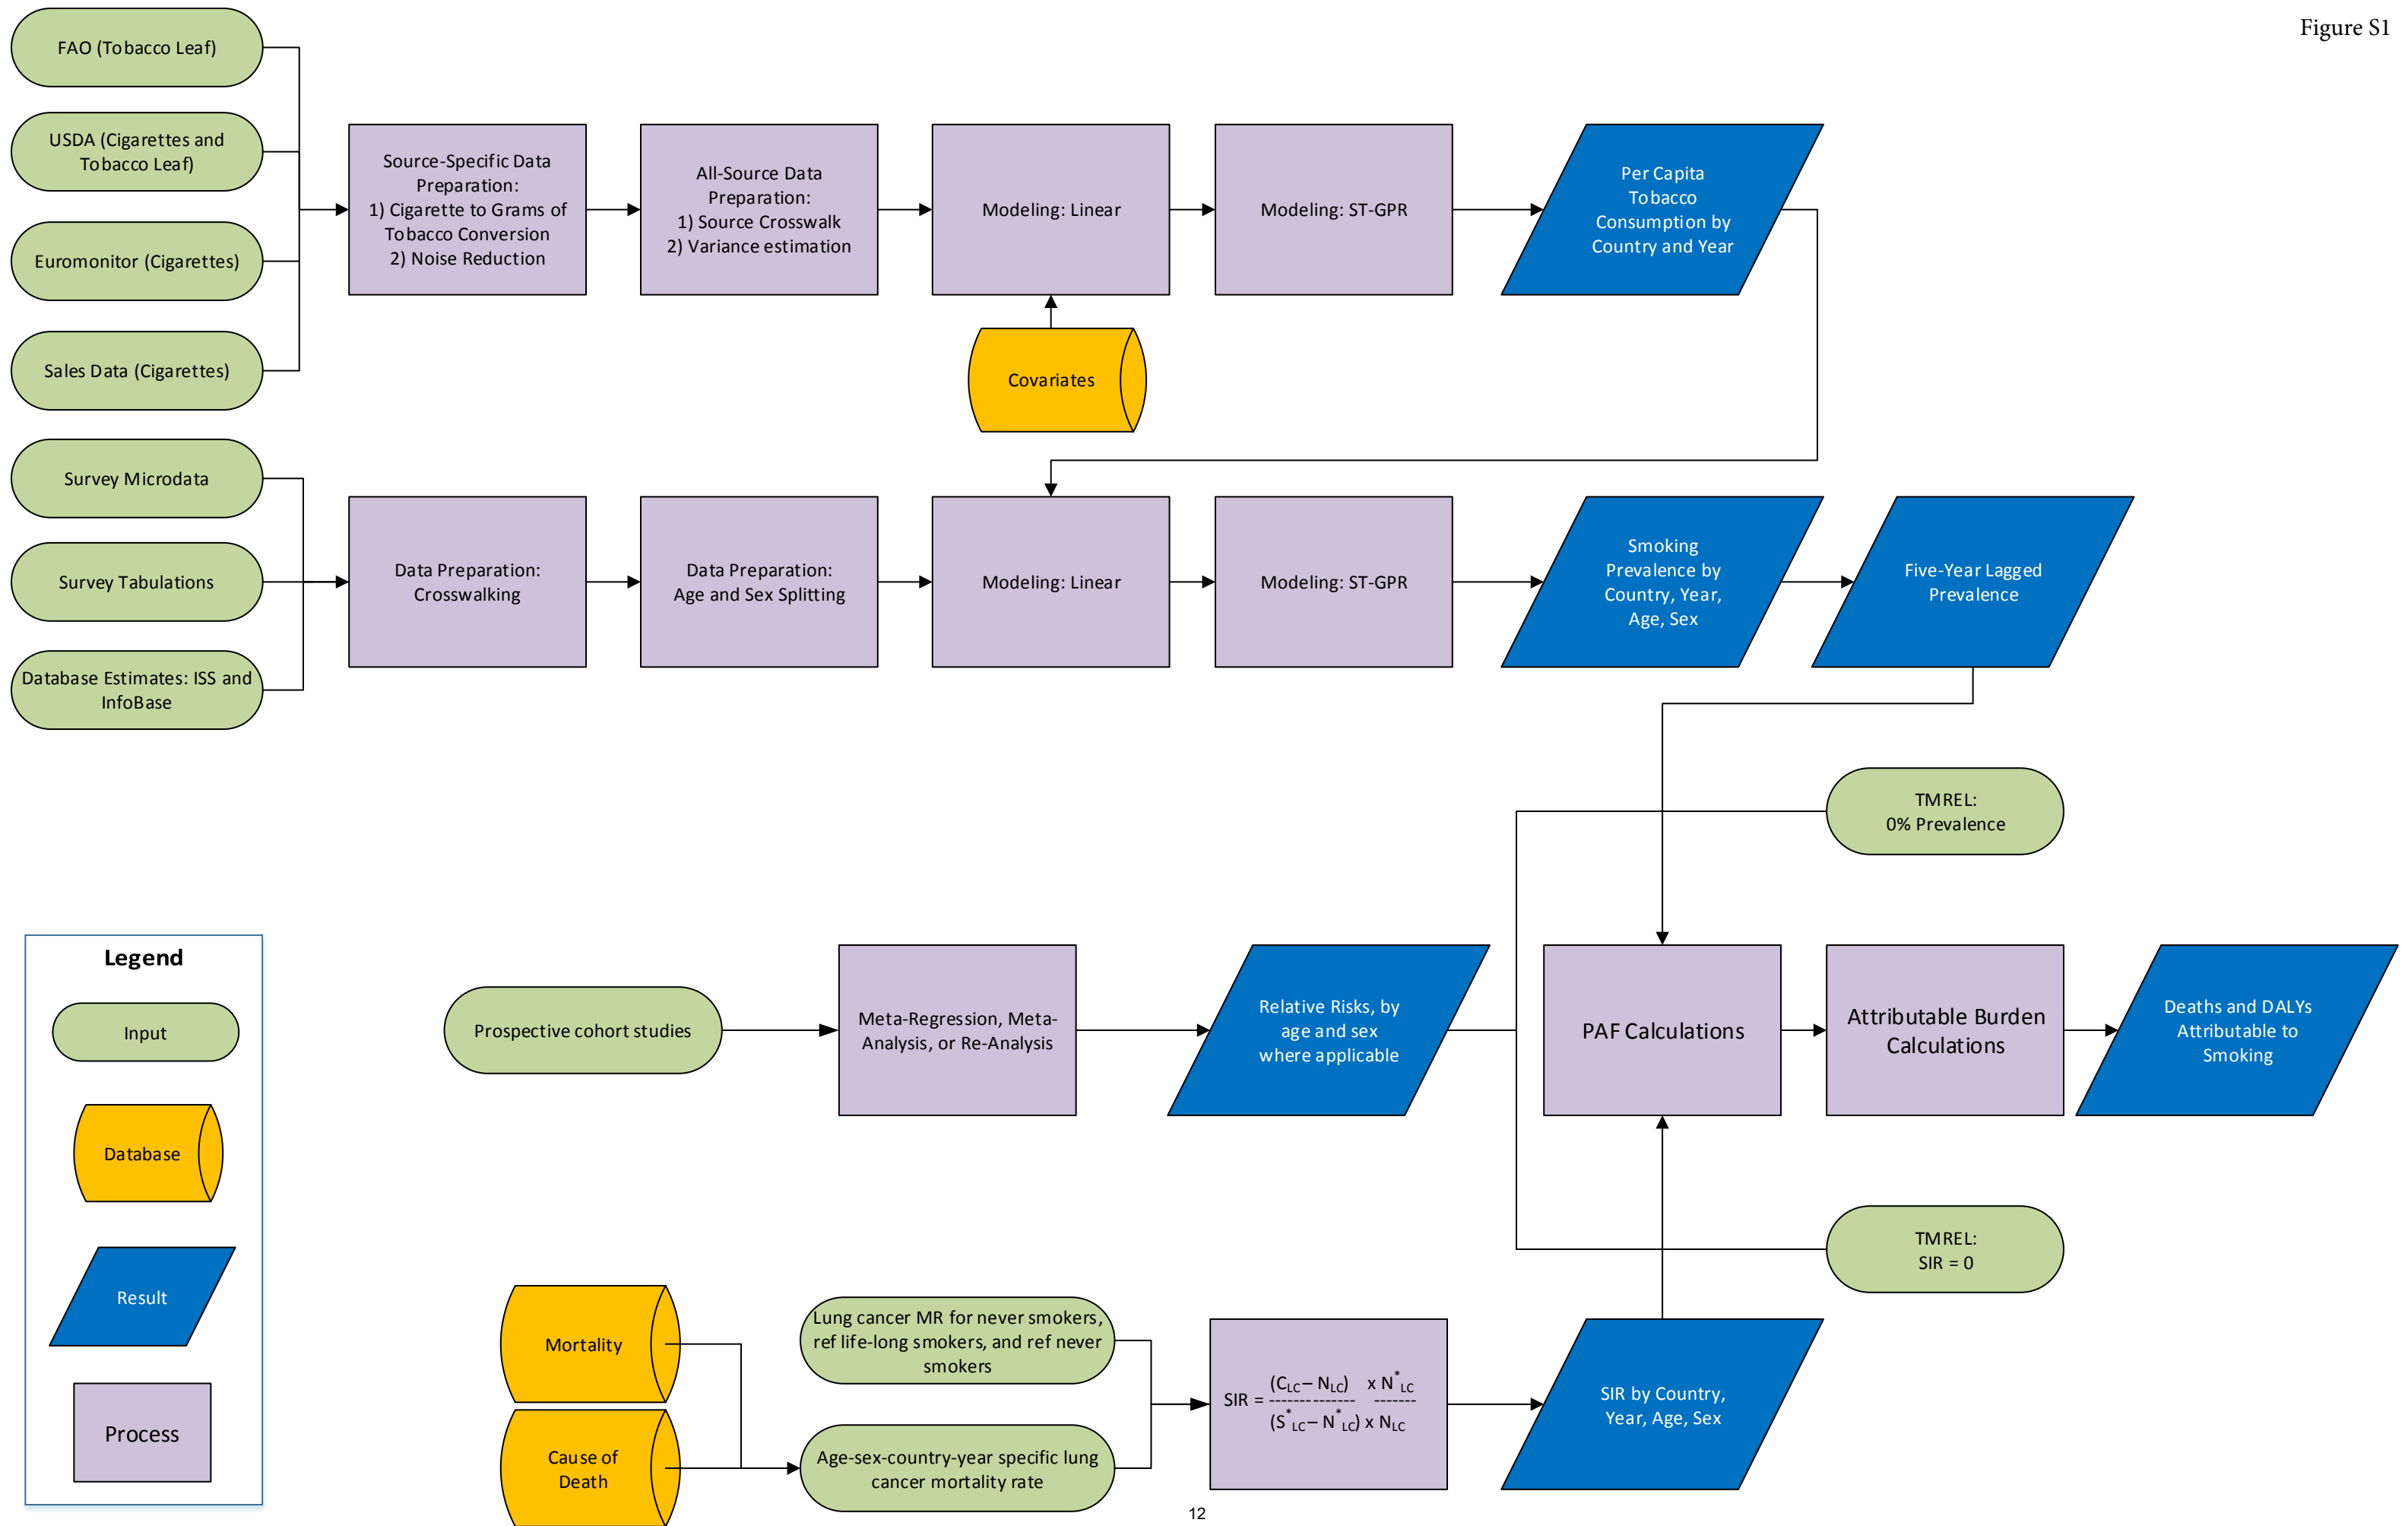

Figure S2a

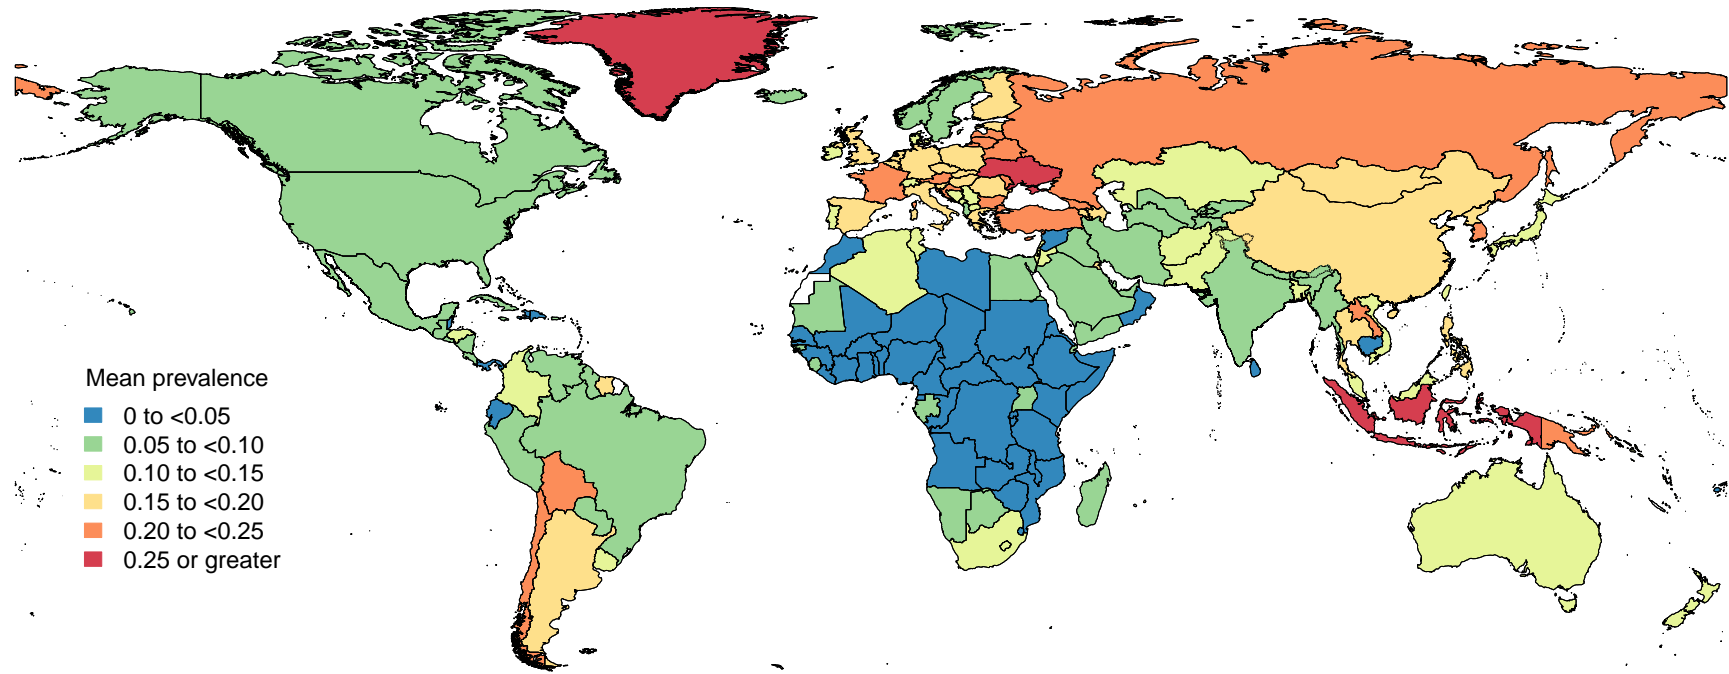

Mean prevalence

- 0 to <0.05
- 0.05 to <0.10
- 0.10 to <0.15
- 0.15 to <0.20
- 0.20 to <0.25
- 0.25 or greater

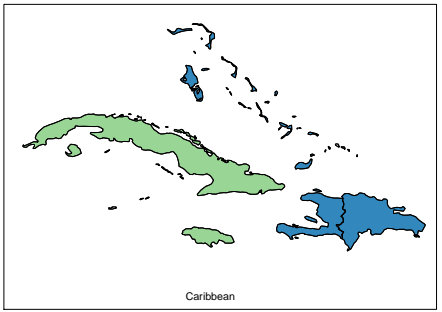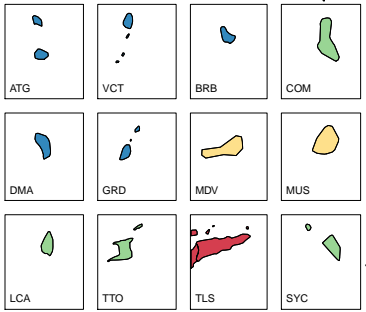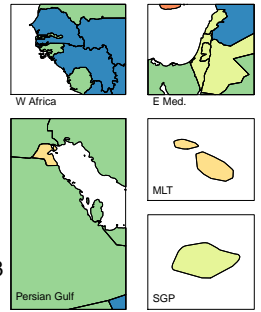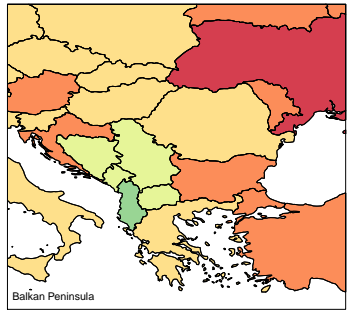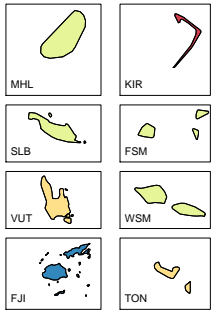

Figure S2b

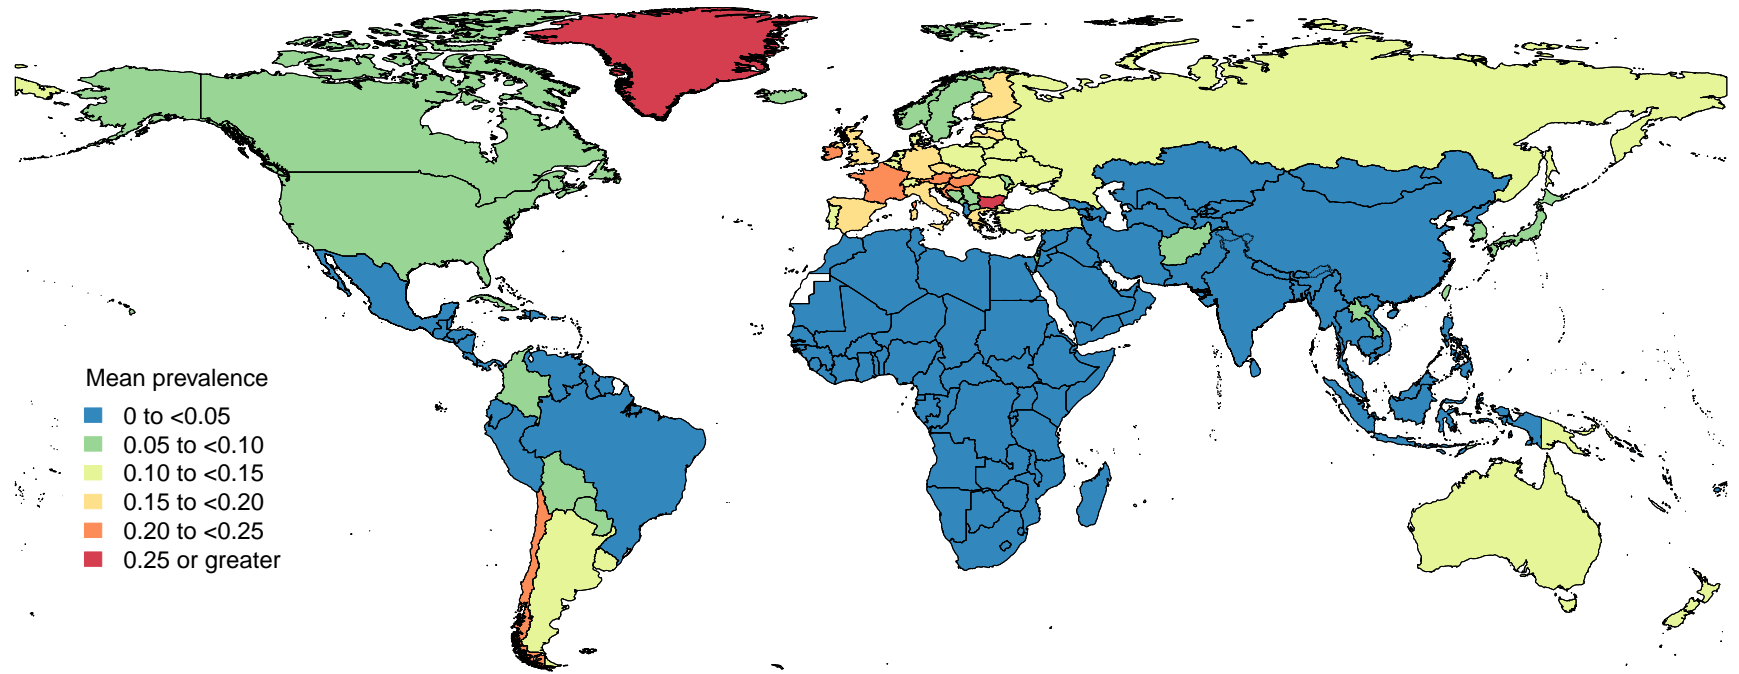

Mean prevalence

- 0 to <0.05
- 0.05 to <0.10
- 0.10 to <0.15
- 0.15 to <0.20
- 0.20 to <0.25
- 0.25 or greater

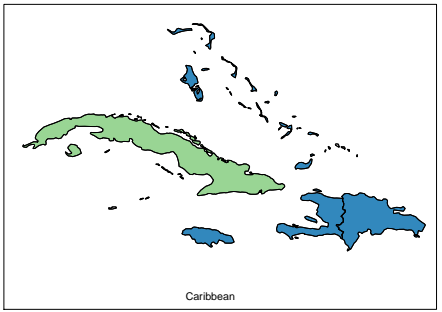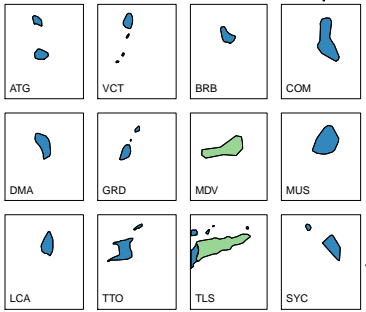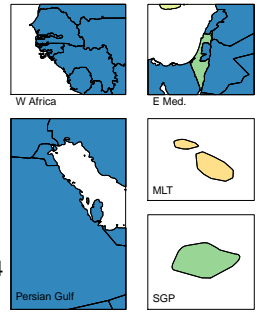

14

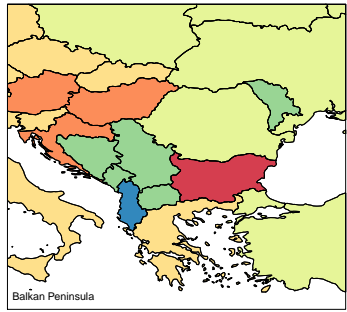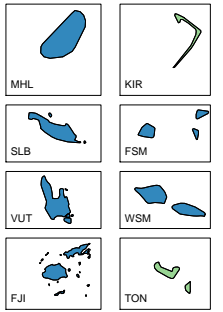

Figure S3a

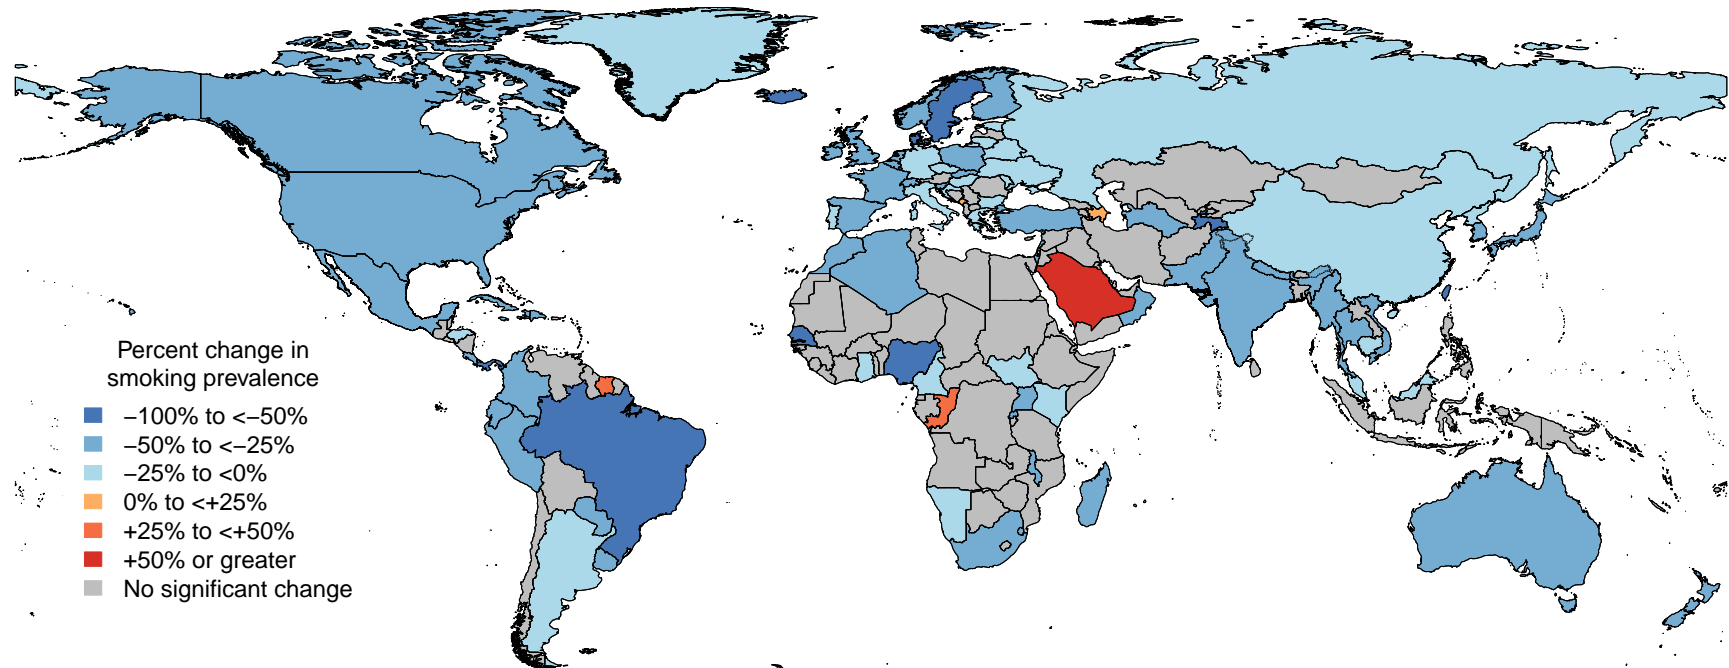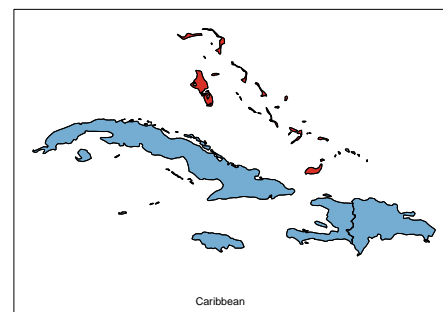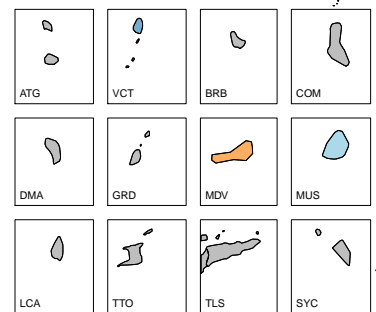

15

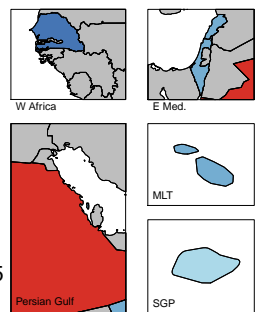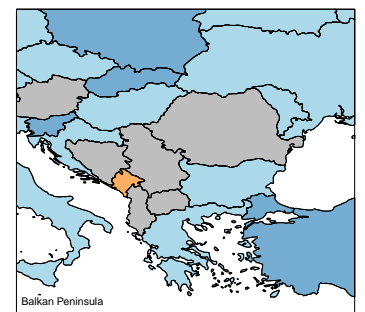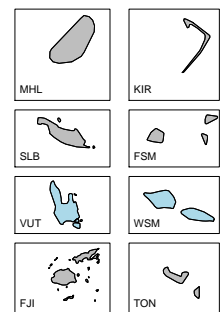

Figure S3b

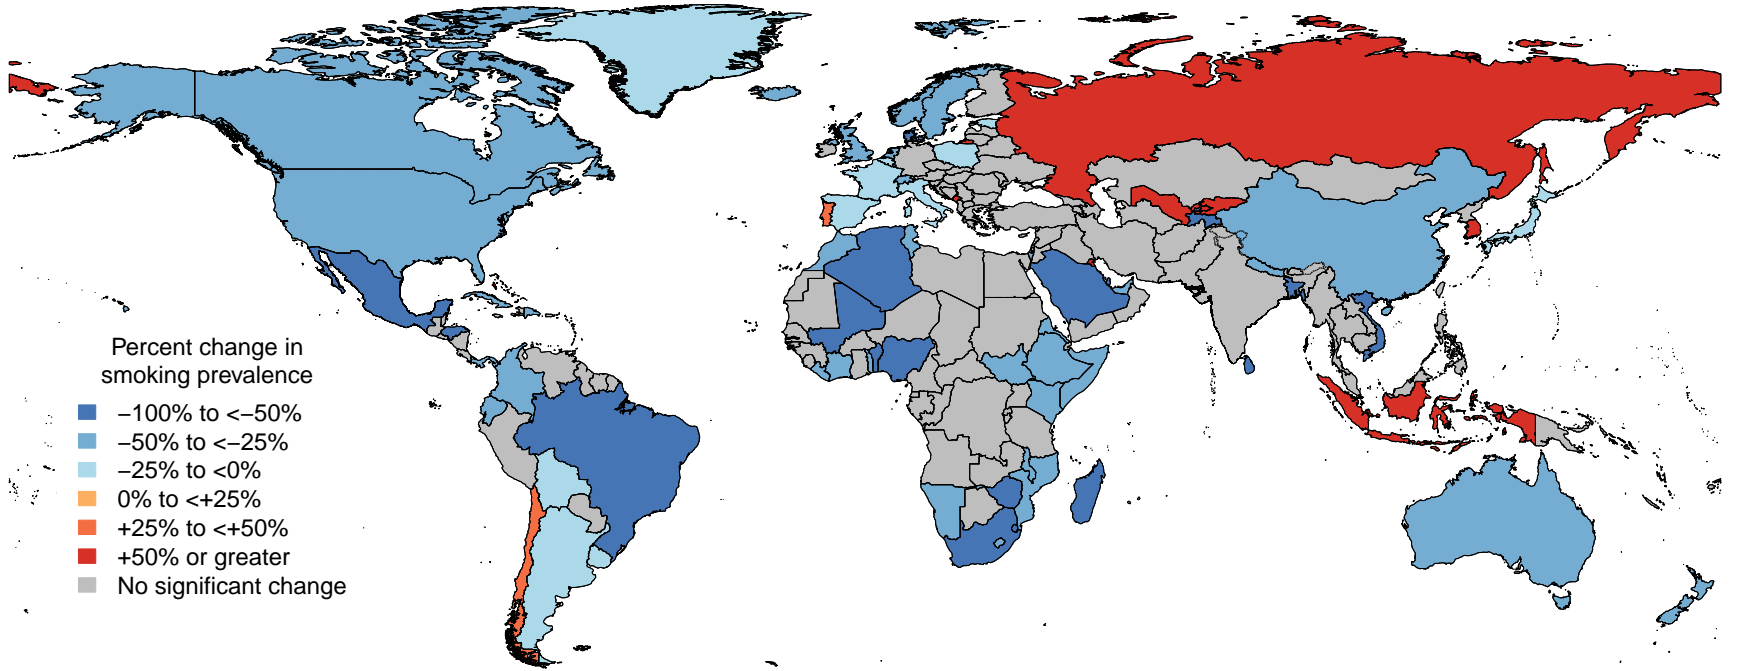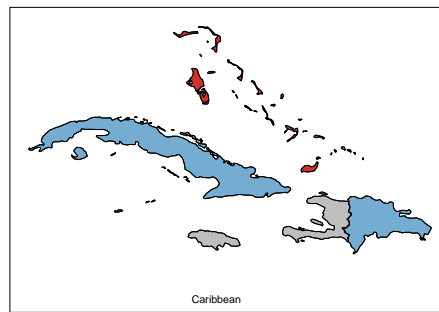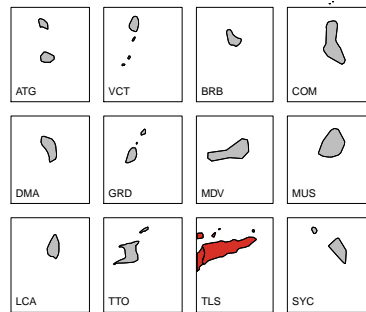

16

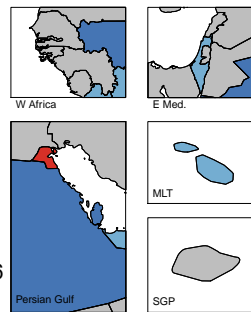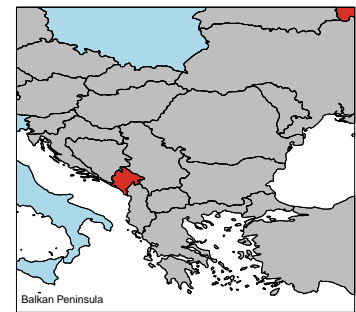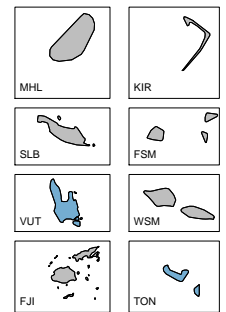

Figure S4a

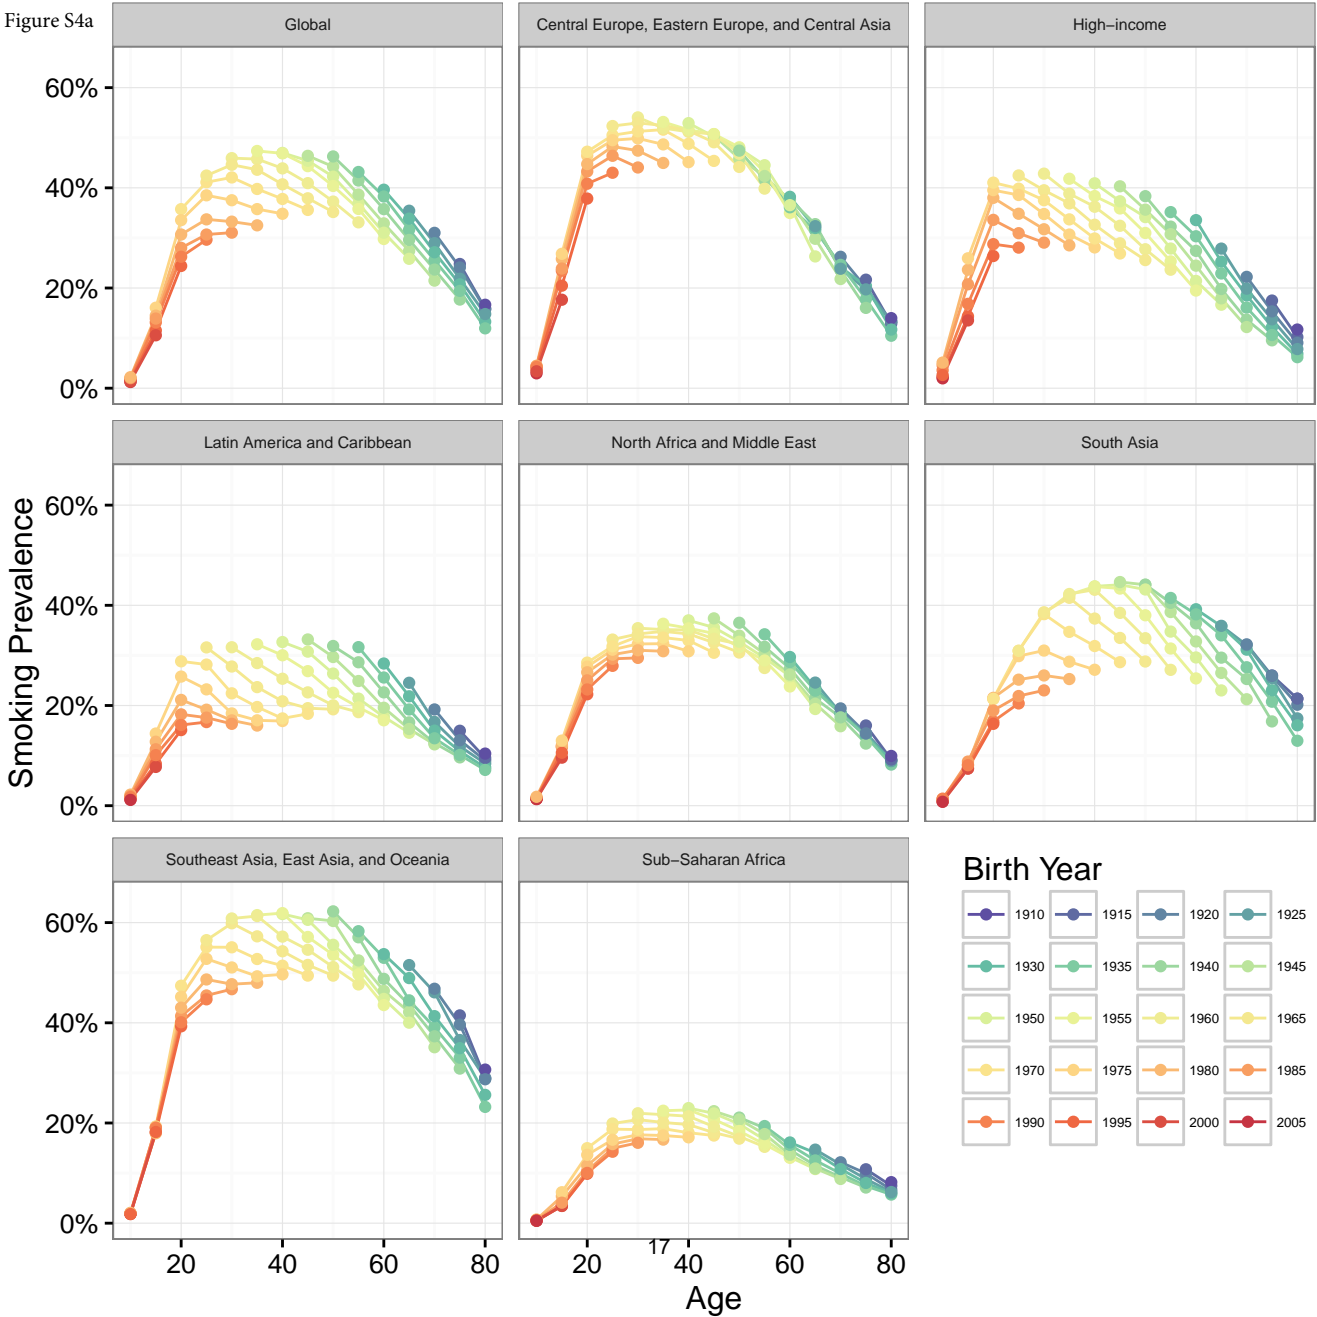

Figure S4b

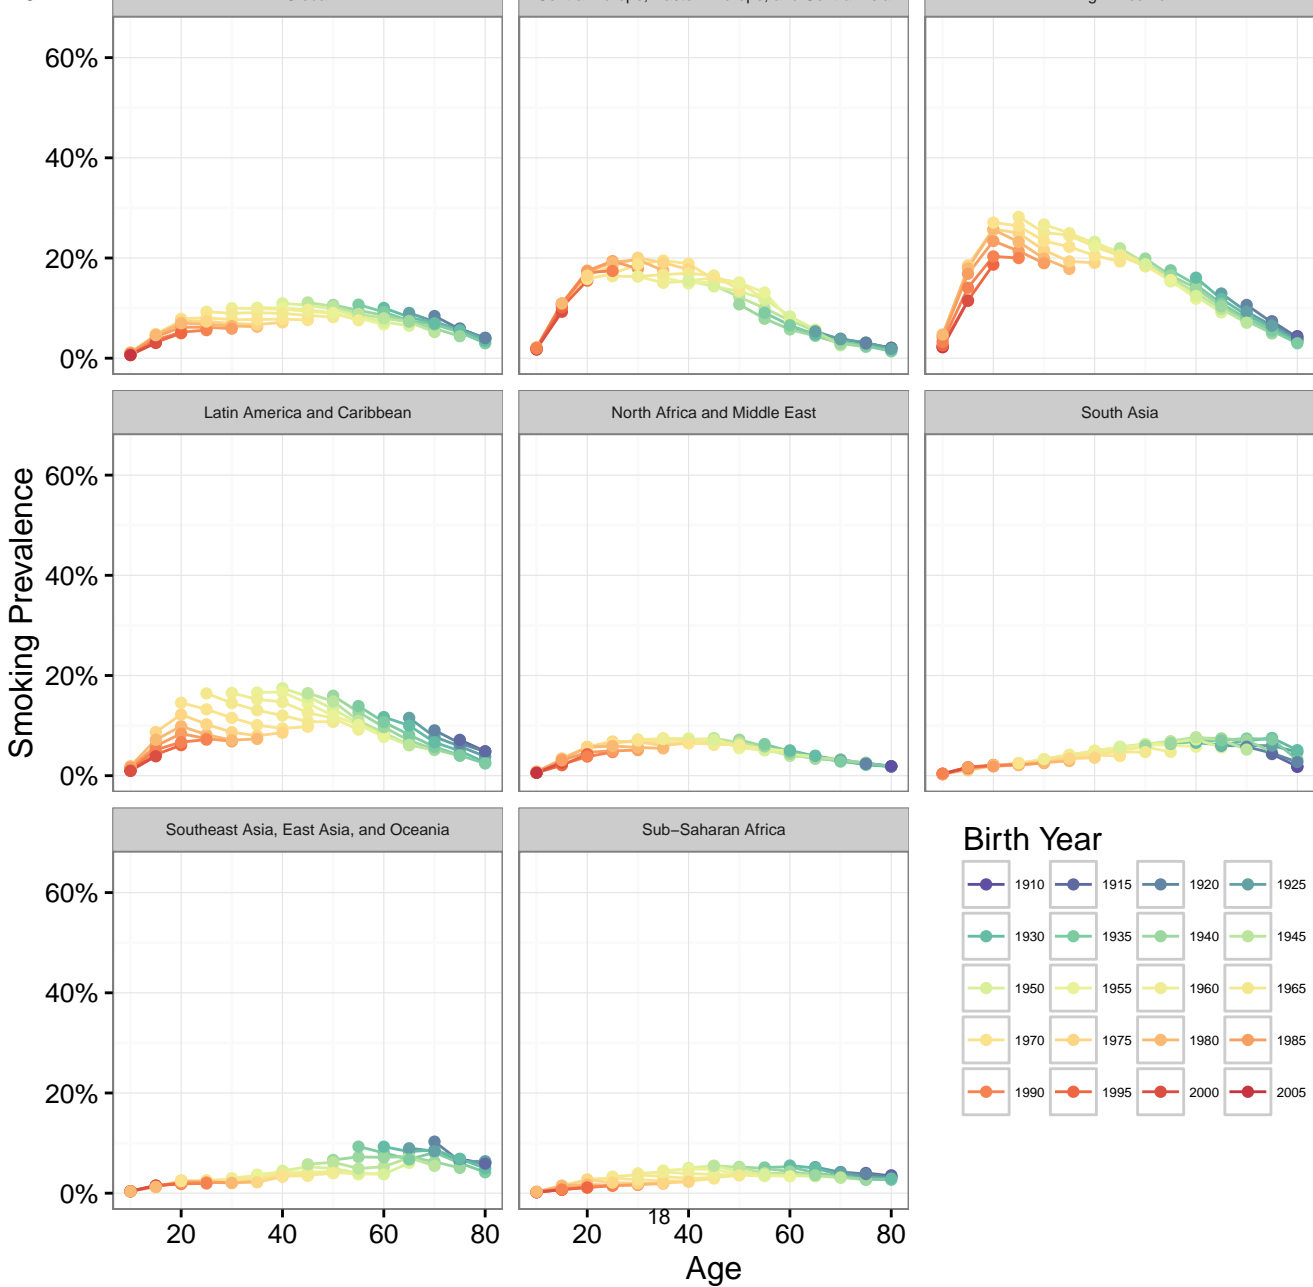

Figure S5a

| Leading causes 1990          | Leading causes 2005           | % change number of DALYs 1990-2005 | % change all-age DALY rate 1990-2005 | % change age-standardised DALY rate 1990-2005 | Leading causes 2015           | % change number of DALYs 2005-2015 | % change all-age DALY rate 2005-2015 | % change age-standardised DALY rate 2005-2015 |
|------------------------------|-------------------------------|------------------------------------|--------------------------------------|-----------------------------------------------|-------------------------------|------------------------------------|--------------------------------------|-----------------------------------------------|
| 1 Ischemic heart disease     | 1 Ischemic heart disease      | 23.1%                              | -0.1%                                | -15.7%                                        | 1 Ischemic heart disease      | 3.2%                               | -8.8%                                | -19.4%                                        |
| 2 Cerebrovascular disease    | 2 Cerebrovascular disease     | 25.9%                              | 2.3%                                 | -13.4%                                        | 2 Cerebrovascular disease     | -2.8%                              | -14.1%                               | -24.6%                                        |
| 3 COPD                       | 3 Lung cancer                 | 22.4%                              | -0.6%                                | -13.8%                                        | 3 Lung cancer                 | 10.2%                              | -2.6%                                | -15.5%                                        |
| 4 Lung cancer                | 4 COPD                        | 15.8%                              | -6.0%                                | -19.5%                                        | 4 COPD                        | 6.3%                               | -6.0%                                | -19.6%                                        |
| 5 Lower respiratory infect   | 5 Lower respiratory infect    | 24.2%                              | 0.8%                                 | -14.8%                                        | 5 Lower respiratory infect    | 0.8%                               | -10.9%                               | -20.9%                                        |
| 6 Tuberculosis               | 6 Tuberculosis                | -15.6%                             | -31.4%                               | -41.7%                                        | 6 Diabetes                    | 19.2%                              | 5.3%                                 | -6.9%                                         |
| 7 Esophageal cancer          | 7 Esophageal cancer           | 31.7%                              | 6.9%                                 | -6.9%                                         | 7 Esophageal cancer           | -4.6%                              | -15.7%                               | -26.6%                                        |
| 8 Hypertensive heart disease | 8 Diabetes                    | 54.6%                              | 25.5%                                | 7.0%                                          | 8 Tuberculosis                | -22.9%                             | -31.9%                               | -38.0%                                        |
| 9 Asthma                     | 9 Liver cancer                | 46.8%                              | 19.2%                                | 2.5%                                          | 9 Liver cancer                | -0.2%                              | -11.8%                               | -20.4%                                        |
| 10 Stomach cancer            | 10 Hypertensive heart disease | -3.2%                              | -21.4%                               | -33.9%                                        | 10 Hypertensive heart disease | 12.9%                              | -0.2%                                | -11.4%                                        |
| 11 Liver cancer              | 11 Asthma                     | -15.4%                             | -31.3%                               | -41.9%                                        | 11 Other cardiovascular       | 9.9%                               | -2.9%                                | -13.5%                                        |
| 12 Diabetes                  | 12 Stomach cancer             | -6.6%                              | -24.2%                               | -34.2%                                        | 12 Asthma                     | -8.4%                              | -19.0%                               | -28.3%                                        |
| 13 Other cardiovascular      | 13 Other cardiovascular       | 0.0%                               | -18.8%                               | -32.1%                                        | 13 Stomach cancer             | -15.2%                             | -25.1%                               | -33.9%                                        |
| 14 Peptic ulcer disease      | 14 Peptic ulcer disease       | -19.0%                             | -34.2%                               | -42.8%                                        | 14 Larynx cancer              | 4.9%                               | -7.3%                                | -19.5%                                        |
| 15 Larynx cancer             | 15 Larynx cancer              | 3.5%                               | -15.9%                               | -27.0%                                        | 15 Lip oral cavity cancer     | 19.6%                              | 5.7%                                 | -7.3%                                         |
| 16 Lip oral cavity cancer    | 16 Lip oral cavity cancer     | 30.1%                              | 5.6%                                 | -9.9%                                         | 16 Pancreatic cancer          | 8.5%                               | -4.1%                                | -16.5%                                        |
| 17 Pancreatic cancer         | 17 Pancreatic cancer          | 22.7%                              | -0.4%                                | -14.5%                                        | 17 Peptic ulcer disease       | -19.2%                             | -28.5%                               | -35.7%                                        |
| 18 Bladder cancer            | 18 Bladder cancer             | 13.3%                              | -8.0%                                | -21.3%                                        | 18 Bladder cancer             | 8.2%                               | -4.3%                                | -18.0%                                        |
| 19 Colorectal cancer         | 19 Colorectal cancer          | 11.6%                              | -9.4%                                | -22.3%                                        | 19 Colorectal cancer          | 1.6%                               | -10.2%                               | -21.7%                                        |
| 20 Leukemia                  | 20 Leukemia                   | 18.0%                              | -4.2%                                | -17.6%                                        | 20 Leukemia                   | 4.9%                               | -7.2%                                | -17.2%                                        |
| 21 Nasopharynx cancer        | 21 Nasopharynx cancer         | 32.4%                              | 7.5%                                 | -8.6%                                         | 21 Nasopharynx cancer         | 4.3%                               | -7.8%                                | -16.9%                                        |
| 22 Aortic aneurysm           | 22 Aortic aneurysm            | 26.3%                              | 2.5%                                 | -14.9%                                        | 22 Aortic aneurysm            | 5.8%                               | -6.5%                                | -17.9%                                        |
| 23 Kidney cancer             | 23 Atrial fibrillation        | 25.9%                              | 2.2%                                 | -14.7%                                        | 23 Atrial fibrillation        | 15.8%                              | 2.4%                                 | -12.2%                                        |
| 24 Atrial fibrillation       | 24 Kidney cancer              | 24.2%                              | 0.8%                                 | -13.3%                                        | 24 Kidney cancer              | 10.1%                              | -2.6%                                | -15.2%                                        |
| 25 Falls                     | 25 Road injuries              | 35.9%                              | 10.4%                                | -6.5%                                         | 25 Road injuries              | -0.4%                              | -12.0%                               | -20.5%                                        |
| 26 Road injuries             | 26 Falls                      | 8.4%                               | -12.0%                               | -22.3%                                        | 26 Falls                      | 2.7%                               | -9.3%                                | -19.2%                                        |
| 27 Sense organ diseases      | 27 Sense organ diseases       | 32.0%                              | 7.2%                                 | -10.1%                                        | 27 Sense organ diseases       | 13.9%                              | 0.7%                                 | -14.1%                                        |
| 28 Other chronic respiratory | 28 Interstitial lung disease  | 55.0%                              | 25.8%                                | 9.8%                                          | 28 Interstitial lung disease  | 23.8%                              | 9.4%                                 | -5.2%                                         |
| 29 Rheumatoid arthritis      | 29 Rheumatoid arthritis       | 20.8%                              | -1.9%                                | -14.3%                                        | 29 Rheumatoid arthritis       | 11.3%                              | -1.6%                                | -11.5%                                        |
| 30 Interstitial lung disease | 30 Other chronic respiratory  | -9.5%                              | -26.6%                               | -37.5%                                        | 30 Other chronic respiratory  | 10.9%                              | -2.0%                                | -12.0%                                        |

**Legend:**  
Communicable, maternal, neonatal and nutritional  
Non-communicable  
Injuries



Figure S5b

| Leading causes 1990          | Leading causes 2005          | % change number of DALYs 1990-2005 | % change all-age DALY rate 1990-2005 | % change age-standardised DALY rate 1990-2005 | Leading causes 2015          | % change number of DALYs 2005-2015 | % change all-age DALY rate 2005-2015 | % change age-standardised DALY rate 2005-2015 |
|------------------------------|------------------------------|------------------------------------|--------------------------------------|-----------------------------------------------|------------------------------|------------------------------------|--------------------------------------|-----------------------------------------------|
| 1 COPD                       | 1 COPD                       | 14.8%                              | -6.5%                                | -17.9%                                        | 1 COPD                       | -5.5%                              | -16.3%                               | -27.0%                                        |
| 2 Ischemic heart disease     | 2 Ischemic heart disease     | -3.2%                              | -21.2%                               | -31.6%                                        | 2 Lung cancer                | 6.8%                               | -5.4%                                | -16.9%                                        |
| 3 Cerebrovascular disease    | 3 Lung cancer                | 47.9%                              | 20.5%                                | 5.9%                                          | 3 Ischemic heart disease     | -7.8%                              | -18.4%                               | -28.3%                                        |
| 4 Lung cancer                | 4 Cerebrovascular disease    | -3.5%                              | -21.4%                               | -31.6%                                        | 4 Cerebrovascular disease    | -18.5%                             | -27.8%                               | -36.3%                                        |
| 5 Lower respiratory infect   | 5 Lower respiratory infect   | 6.9%                               | -12.9%                               | -24.1%                                        | 5 Lower respiratory infect   | -9.7%                              | -20.0%                               | -29.2%                                        |
| 6 Asthma                     | 6 Esophageal cancer          | 32.1%                              | 7.6%                                 | -5.4%                                         | 6 Esophageal cancer          | -25.7%                             | -34.2%                               | -42.4%                                        |
| 7 Esophageal cancer          | 7 Other cardiovascular       | -2.7%                              | -20.7%                               | -31.4%                                        | 7 Other cardiovascular       | -1.2%                              | -12.5%                               | -22.0%                                        |
| 8 Other cardiovascular       | 8 Asthma                     | -12.8%                             | -29.0%                               | -38.3%                                        | 8 Hypertensive heart disease | -5.4%                              | -16.3%                               | -26.2%                                        |
| 9 Hypertensive heart disease | 9 Hypertensive heart disease | -10.0%                             | -26.7%                               | -36.5%                                        | 9 Asthma                     | -11.5%                             | -21.7%                               | -29.4%                                        |
| 10 Tuberculosis              | 10 Cervical cancer           | 23.9%                              | 0.9%                                 | -13.4%                                        | 10 Pancreatic cancer         | 15.6%                              | 2.3%                                 | -10.6%                                        |
| 11 Cervical cancer           | 11 Pancreatic cancer         | 44.6%                              | 17.8%                                | 3.6%                                          | 11 Colorectal cancer         | 2.3%                               | -9.4%                                | -20.4%                                        |
| 12 Stomach cancer            | 12 Colorectal cancer         | 25.6%                              | 2.3%                                 | -10.5%                                        | 12 Cervical cancer           | -7.1%                              | -17.8%                               | -25.3%                                        |
| 13 Colorectal cancer         | 13 Liver cancer              | 36.0%                              | 10.8%                                | -1.9%                                         | 13 Larynx cancer             | 7.2%                               | -5.1%                                | -16.6%                                        |
| 14 Peptic ulcer disease      | 14 Stomach cancer            | 2.0%                               | -16.9%                               | -27.0%                                        | 14 Lip oral cavity cancer    | 23.3%                              | 9.1%                                 | -4.0%                                         |
| 15 Larynx cancer             | 15 Tuberculosis              | -23.9%                             | -38.0%                               | -46.1%                                        | 15 Liver cancer              | -12.4%                             | -22.4%                               | -30.5%                                        |
| 16 Pancreatic cancer         | 16 Larynx cancer             | 9.1%                               | -11.1%                               | -22.3%                                        | 16 Stomach cancer            | -20.4%                             | -29.5%                               | -37.0%                                        |
| 17 Liver cancer              | 17 Lip oral cavity cancer    | 43.3%                              | 16.8%                                | 1.4%                                          | 17 Tuberculosis              | -33.4%                             | -41.0%                               | -46.9%                                        |
| 18 Lip oral cavity cancer    | 18 Peptic ulcer disease      | -22.5%                             | -36.9%                               | -44.4%                                        | 18 Diabetes                  | 6.6%                               | -5.6%                                | -17.1%                                        |
| 19 Diabetes                  | 19 Diabetes                  | 21.3%                              | -1.2%                                | -13.5%                                        | 19 Peptic ulcer disease      | -17.3%                             | -26.8%                               | -35.0%                                        |
| 20 Rheumatoid arthritis      | 20 Nasopharynx cancer        | 9.5%                               | -10.8%                               | -22.2%                                        | 20 Atrial fibrillation       | 11.0%                              | -1.7%                                | -14.7%                                        |
| 21 Nasopharynx cancer        | 21 Rheumatoid arthritis      | 5.3%                               | -14.2%                               | -24.1%                                        | 21 Bladder cancer            | 11.4%                              | -1.3%                                | -14.1%                                        |
| 22 Falls                     | 22 Atrial fibrillation       | 12.1%                              | -8.7%                                | -20.9%                                        | 22 Rheumatoid arthritis      | 4.7%                               | -7.3%                                | -16.6%                                        |
| 23 Atrial fibrillation       | 23 Bladder cancer            | 36.2%                              | 11.0%                                | -2.8%                                         | 23 Nasopharynx cancer        | -17.2%                             | -26.7%                               | -33.2%                                        |
| 24 Bladder cancer            | 24 Falls                     | -1.5%                              | -19.7%                               | -29.0%                                        | 24 Interstitial lung disease | 24.8%                              | 10.5%                                | -2.8%                                         |
| 25 Aortic aneurysm           | 25 Interstitial lung disease | 96.6%                              | 60.2%                                | 41.5%                                         | 25 Falls                     | -5.6%                              | -16.4%                               | -26.0%                                        |
| 26 Sense organ diseases      | 26 Sense organ diseases      | 26.8%                              | 3.3%                                 | -10.7%                                        | 26 Sense organ diseases      | 4.7%                               | -7.3%                                | -19.7%                                        |
| 27 Other chronic respiratory | 27 Aortic aneurysm           | 12.0%                              | -8.7%                                | -21.2%                                        | 27 Aortic aneurysm           | 3.9%                               | -8.0%                                | -18.5%                                        |
| 28 Kidney cancer             | 28 Kidney cancer             | 29.7%                              | 5.7%                                 | -6.9%                                         | 28 Kidney cancer             | 12.0%                              | -0.8%                                | -13.0%                                        |
| 29 Leukemia                  | 29 Leukemia                  | 31.1%                              | 6.8%                                 | -6.2%                                         | 29 Leukemia                  | -1.6%                              | -12.9%                               | -21.2%                                        |
| 30 Road injuries             | 30 Other chronic respiratory | -4.9%                              | -22.5%                               | -32.0%                                        | 30 Other chronic respiratory | 7.3%                               | -5.0%                                | -15.0%                                        |
| 31 Interstitial lung disease | 31 Road injuries             |                                    |                                      |                                               | 32 Road injuries             |                                    |                                      |                                               |

**Legend:**  
 Communicable, maternal, neonatal and nutritional  
 Non-communicable  
 Injuries

Figure S6a

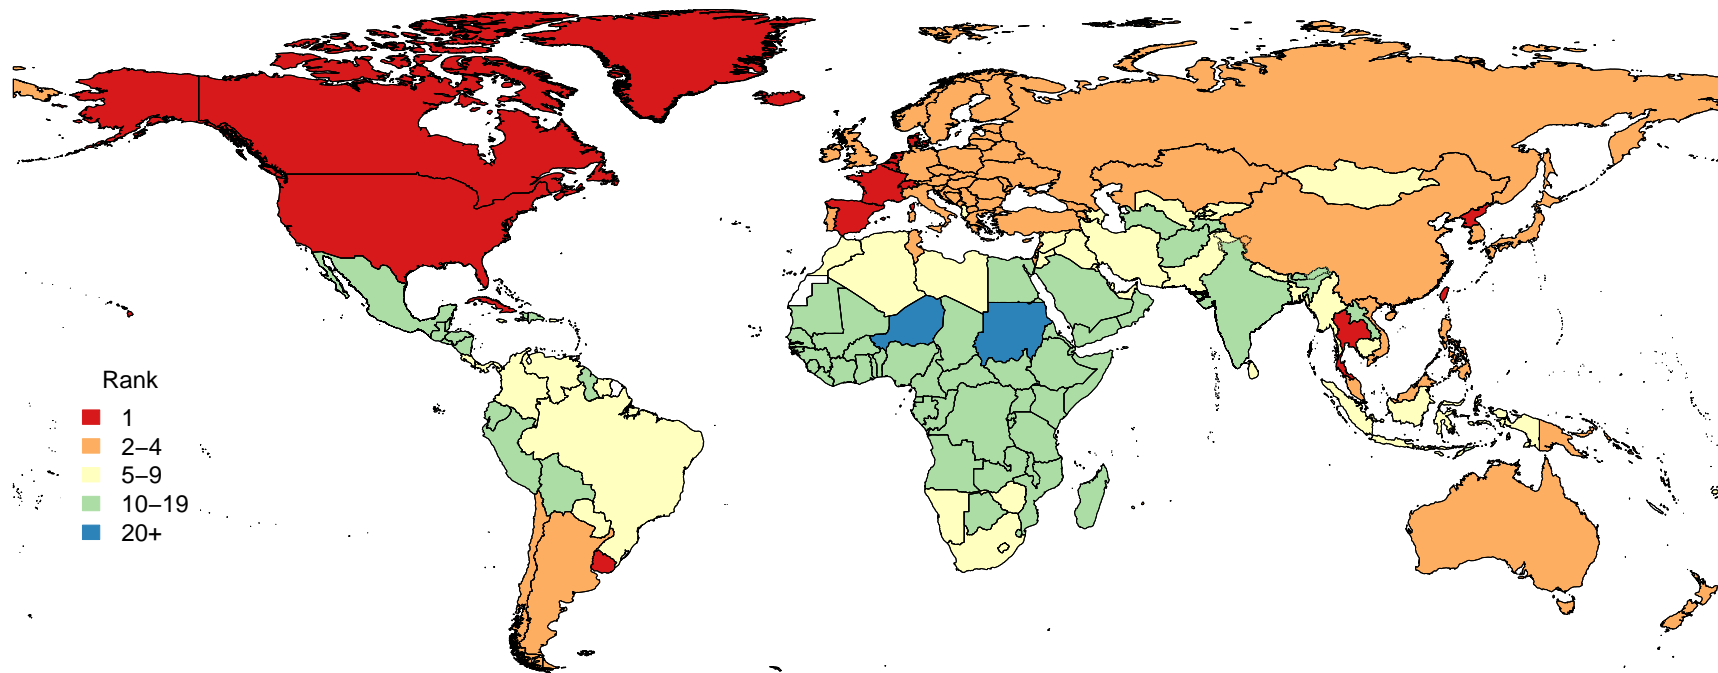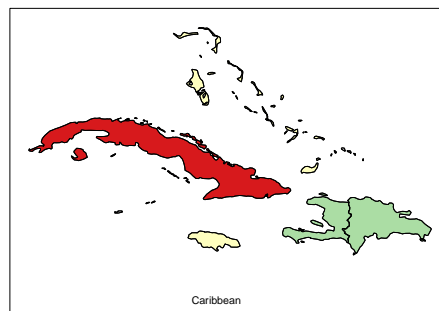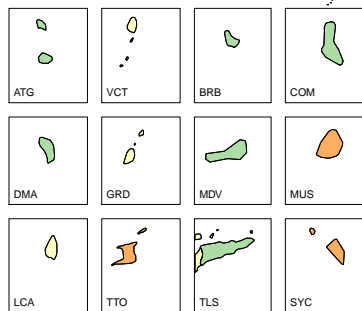

21

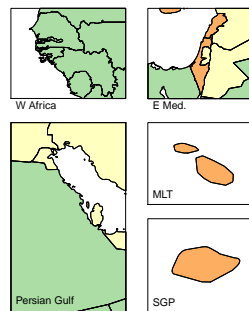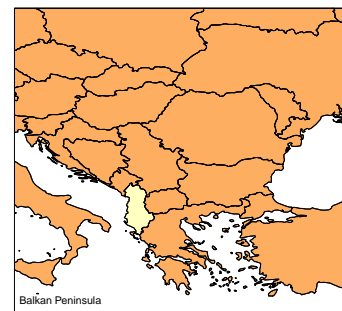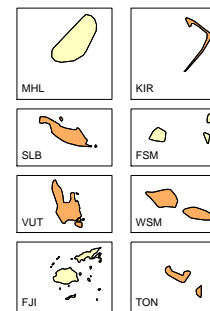

Figure S6b

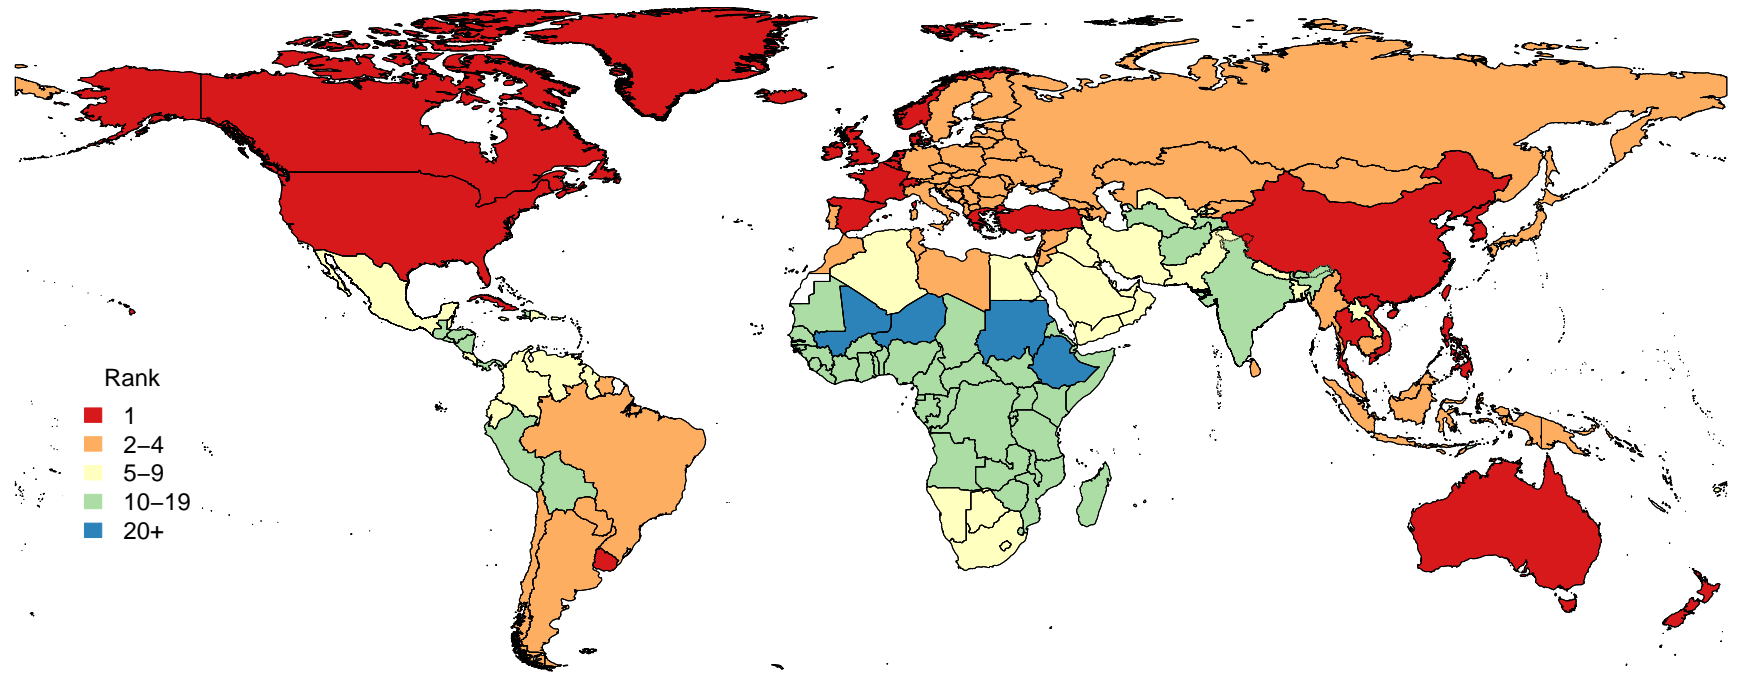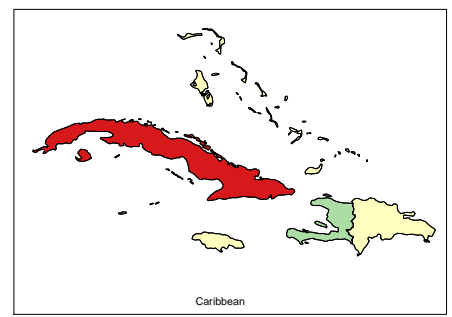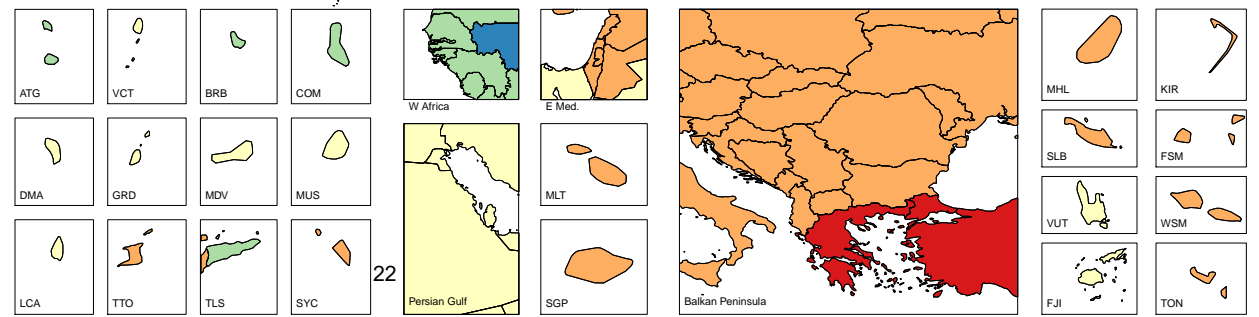

Table S1

| <b>Location</b>          | <b>SDI Group</b> | <b>SDI Value</b> |
|--------------------------|------------------|------------------|
| Afghanistan              | Low SDI          | 0.2888           |
| Albania                  | High-middle SDI  | 0.7364           |
| Algeria                  | Middle SDI       | 0.59             |
| American Samoa           | High-middle SDI  | 0.7136           |
| Andorra                  | High SDI         | 0.9186           |
| Angola                   | Low-middle SDI   | 0.4191           |
| Antigua and Barbuda      | High SDI         | 0.841            |
| Argentina                | High-middle SDI  | 0.772            |
| Armenia                  | High-middle SDI  | 0.7552           |
| Australia                | High SDI         | 0.9151           |
| Austria                  | High SDI         | 0.8883           |
| Azerbaijan               | High-middle SDI  | 0.7883           |
| Bahrain                  | High-middle SDI  | 0.7764           |
| Bangladesh               | Low-middle SDI   | 0.4716           |
| Barbados                 | High-middle SDI  | 0.7824           |
| Belarus                  | High SDI         | 0.8468           |
| Belgium                  | High SDI         | 0.8815           |
| Belize                   | Middle SDI       | 0.6652           |
| Benin                    | Low SDI          | 0.3446           |
| Bermuda                  | High SDI         | 0.9164           |
| Bhutan                   | Low-middle SDI   | 0.5321           |
| Bolivia                  | Middle SDI       | 0.612            |
| Bosnia and Herzegovina   | High-middle SDI  | 0.7387           |
| Botswana                 | Middle SDI       | 0.6411           |
| Brazil                   | Middle SDI       | 0.6616           |
| Brunei                   | High SDI         | 0.9232           |
| Bulgaria                 | High-middle SDI  | 0.8079           |
| Burkina Faso             | Low SDI          | 0.2374           |
| Burundi                  | Low SDI          | 0.2395           |
| Cambodia                 | Low-middle SDI   | 0.4861           |
| Cameroon                 | Low-middle SDI   | 0.4641           |
| Canada                   | High SDI         | 0.9375           |
| Cape Verde               | Low-middle SDI   | 0.5485           |
| Central African Republic | Low SDI          | 0.2817           |
| Chad                     | Low SDI          | 0.2871           |
| Chile                    | High-middle SDI  | 0.8048           |
| China                    | Middle SDI       | 0.678            |
| Colombia                 | High-middle SDI  | 0.6998           |
| Comoros                  | Low SDI          | 0.365            |
| Congo                    | Low-middle SDI   | 0.5265           |
| Costa Rica               | High-middle SDI  | 0.7232           |
| Cote d'Ivoire            | Low SDI          | 0.3807           |
| Croatia                  | High-middle SDI  | 0.7842           |
| Cuba                     | High-middle SDI  | 0.7662           |
| Cyprus                   | High SDI         | 0.8805           |
| Czech Republic           | High SDI         | 0.8918           |

|                                  |                 |        |
|----------------------------------|-----------------|--------|
| Democratic Republic of the Congo | Low SDI         | 0.2388 |
| Denmark                          | High SDI        | 0.9096 |
| Djibouti                         | Low-middle SDI  | 0.4615 |
| Dominica                         | High-middle SDI | 0.7526 |
| Dominican Republic               | High-middle SDI | 0.6837 |
| Ecuador                          | High-middle SDI | 0.6852 |
| Egypt                            | Middle SDI      | 0.6191 |
| El Salvador                      | Middle SDI      | 0.6187 |
| Equatorial Guinea                | Middle SDI      | 0.6086 |
| Eritrea                          | Low SDI         | 0.3238 |
| Estonia                          | High SDI        | 0.8608 |
| Ethiopia                         | Low SDI         | 0.3022 |
| Federated States of Micronesia   | Middle SDI      | 0.6242 |
| Fiji                             | High-middle SDI | 0.6934 |
| Finland                          | High SDI        | 0.8929 |
| France                           | High SDI        | 0.8343 |
| Gabon                            | Middle SDI      | 0.6435 |
| Georgia                          | High-middle SDI | 0.7611 |
| Germany                          | High SDI        | 0.9026 |
| Ghana                            | Low-middle SDI  | 0.511  |
| Greece                           | High-middle SDI | 0.8246 |
| Greenland                        | High-middle SDI | 0.7575 |
| Grenada                          | High-middle SDI | 0.7532 |
| Guam                             | High SDI        | 0.8841 |
| Guatemala                        | Low-middle SDI  | 0.5427 |
| Guinea                           | Low SDI         | 0.2777 |
| Guinea-Bissau                    | Low SDI         | 0.2943 |
| Guyana                           | Middle SDI      | 0.6546 |
| Haiti                            | Low-middle SDI  | 0.4118 |
| Honduras                         | Middle SDI      | 0.5684 |
| Hungary                          | High SDI        | 0.8491 |
| Iceland                          | High SDI        | 0.8933 |
| India                            | Low-middle SDI  | 0.5564 |
| Indonesia                        | Middle SDI      | 0.6523 |
| Iran                             | High-middle SDI | 0.7154 |
| Iraq                             | Middle SDI      | 0.5756 |
| Ireland                          | High SDI        | 0.8852 |
| Israel                           | High SDI        | 0.8424 |
| Italy                            | High SDI        | 0.8559 |
| Jamaica                          | High-middle SDI | 0.7189 |
| Japan                            | High SDI        | 0.8955 |
| Jordan                           | High-middle SDI | 0.6949 |
| Kazakhstan                       | High-middle SDI | 0.8067 |
| Kenya                            | Low SDI         | 0.4716 |
| Kiribati                         | Low-middle SDI  | 0.4778 |
| Kuwait                           | High SDI        | 0.8624 |
| Kyrgyzstan                       | Middle SDI      | 0.6307 |

|                          |                 |        |
|--------------------------|-----------------|--------|
| Laos                     | Low-middle SDI  | 0.5077 |
| Latvia                   | High SDI        | 0.8614 |
| Lebanon                  | High-middle SDI | 0.7547 |
| Lesotho                  | Low-middle SDI  | 0.5217 |
| Liberia                  | Low SDI         | 0.2827 |
| Libya                    | Middle SDI      | 0.643  |
| Lithuania                | High SDI        | 0.8369 |
| Luxembourg               | High SDI        | 0.9111 |
| Macedonia                | High-middle SDI | 0.7622 |
| Madagascar               | Low SDI         | 0.3698 |
| Malawi                   | Low SDI         | 0.3086 |
| Malaysia                 | High-middle SDI | 0.7669 |
| Maldives                 | Middle SDI      | 0.6229 |
| Mali                     | Low SDI         | 0.2309 |
| Malta                    | High-middle SDI | 0.8062 |
| Marshall Islands         | Middle SDI      | 0.5916 |
| Mauritania               | Low SDI         | 0.4014 |
| Mauritius                | High-middle SDI | 0.7353 |
| Mexico                   | Middle SDI      | 0.7176 |
| Moldova                  | High-middle SDI | 0.7033 |
| Mongolia                 | High-middle SDI | 0.7047 |
| Montenegro               | High-middle SDI | 0.7989 |
| Morocco                  | Low-middle SDI  | 0.4959 |
| Mozambique               | Low SDI         | 0.278  |
| Myanmar                  | Low-middle SDI  | 0.52   |
| Namibia                  | Middle SDI      | 0.617  |
| Nepal                    | Low-middle SDI  | 0.4227 |
| Netherlands              | High SDI        | 0.8936 |
| New Zealand              | High SDI        | 0.8842 |
| Nicaragua                | Middle SDI      | 0.5631 |
| Niger                    | Low SDI         | 0.1465 |
| Nigeria                  | Low-middle SDI  | 0.474  |
| North Korea              | Middle SDI      | 0.5652 |
| Northern Mariana Islands | High SDI        | 0.8406 |
| Norway                   | High SDI        | 0.9365 |
| Oman                     | High-middle SDI | 0.7301 |
| Pakistan                 | Low-middle SDI  | 0.4676 |
| Palestine                | Middle SDI      | 0.567  |
| Panama                   | High-middle SDI | 0.7467 |
| Papua New Guinea         | Low-middle SDI  | 0.4481 |
| Paraguay                 | Middle SDI      | 0.6436 |
| Peru                     | High-middle SDI | 0.705  |
| Philippines              | Middle SDI      | 0.6454 |
| Poland                   | High SDI        | 0.8675 |
| Portugal                 | High-middle SDI | 0.7522 |
| Puerto Rico              | High SDI        | 0.882  |
| Qatar                    | High-middle SDI | 0.8045 |

|                                  |                 |        |
|----------------------------------|-----------------|--------|
| Romania                          | High-middle SDI | 0.7991 |
| Russia                           | High SDI        | 0.8564 |
| Rwanda                           | Low SDI         | 0.3713 |
| Saint Lucia                      | High-middle SDI | 0.7408 |
| Saint Vincent and the Grenadines | High-middle SDI | 0.7473 |
| Samoa                            | Middle SDI      | 0.6367 |
| Sao Tome and Principe            | Low-middle SDI  | 0.4481 |
| Saudi Arabia                     | High-middle SDI | 0.7593 |
| Senegal                          | Low SDI         | 0.3341 |
| Serbia                           | High-middle SDI | 0.7718 |
| Seychelles                       | High-middle SDI | 0.7585 |
| Sierra Leone                     | Low SDI         | 0.323  |
| Singapore                        | High SDI        | 0.8811 |
| Slovakia                         | High SDI        | 0.8615 |
| Slovenia                         | High SDI        | 0.8561 |
| Solomon Islands                  | Low-middle SDI  | 0.4614 |
| Somalia                          | Low SDI         | 0.1506 |
| South Africa                     | Middle SDI      | 0.7164 |
| South Korea                      | High SDI        | 0.8713 |
| South Sudan                      | Low SDI         | 0.2616 |
| Spain                            | High-middle SDI | 0.8192 |
| Sri Lanka                        | High-middle SDI | 0.7054 |
| Sudan                            | Low-middle SDI  | 0.4282 |
| Suriname                         | High-middle SDI | 0.7037 |
| Swaziland                        | Middle SDI      | 0.6232 |
| Sweden                           | High SDI        | 0.8921 |
| Switzerland                      | High SDI        | 0.9282 |
| Syria                            | Middle SDI      | 0.579  |
| Taiwan                           | High SDI        | 0.8648 |
| Tajikistan                       | Middle SDI      | 0.5741 |
| Tanzania                         | Low-middle SDI  | 0.4114 |
| Thailand                         | High-middle SDI | 0.705  |
| The Bahamas                      | High SDI        | 0.8348 |
| The Gambia                       | Low SDI         | 0.3266 |
| Timor-Leste                      | Low-middle SDI  | 0.4499 |
| Togo                             | Low SDI         | 0.3617 |
| Tonga                            | Middle SDI      | 0.6224 |
| Trinidad and Tobago              | High SDI        | 0.8327 |
| Tunisia                          | Middle SDI      | 0.6515 |
| Turkey                           | High-middle SDI | 0.69   |
| Turkmenistan                     | High-middle SDI | 0.7805 |
| Uganda                           | Low SDI         | 0.3768 |
| Ukraine                          | High-middle SDI | 0.8111 |
| United Arab Emirates             | High SDI        | 0.8747 |
| United Kingdom                   | High SDI        | 0.893  |
| United States                    | High SDI        | 0.9311 |
| Uruguay                          | High-middle SDI | 0.745  |

|                      |                 |        |
|----------------------|-----------------|--------|
| Uzbekistan           | High-middle SDI | 0.6992 |
| Vanuatu              | Low-middle SDI  | 0.536  |
| Venezuela            | High-middle SDI | 0.7283 |
| Vietnam              | Middle SDI      | 0.6283 |
| Virgin Islands, U.S. | High SDI        | 0.8861 |
| Yemen                | Low-middle SDI  | 0.408  |
| Zambia               | Low-middle SDI  | 0.467  |
| Zimbabwe             | Low-middle SDI  | 0.5384 |



Table S2

---

**Relative Risk Citations**


---

Anda RF, Williamson DF, Escobedo LG, Remington PL. Smoking and the risk of peptic ulcer disease among women in the United States. *Arch Intern Med.* 1990; 150(7): 1437–41.

Buch H, Vinding T, la Cour M, Jensen GB, Prause JU, Nielsen NV. Risk factors for age-related maculopathy in a 14-year follow-up study: the Copenhagen City Eye Study. *Acta Ophthalmol Scand.* 2005; 83(4): 409-18 as it appears in Chakravarthy U, Wong TY, Fletcher A, Piau E, Evans C, Zlateva G, Buggage R, Pleil A, Mitchell P. Clinical risk factors for age-related macular degeneration in men. *JAMA.* 2000; 284(6): 713-6 as it appears in Ye J, He J, Wang C, Wu H, Shi X, Zhang H, Xie J, Lee SY. Smoking and risk of age-related cataract: a meta-analysis. *Invest Ophthalmol Vis Sci.* 2012; 53(12): 7133-40.

Christen WG, Glynn RJ, Ajani UA, Schaumberg DA, Buring JE, Hennekens CH, Manson JE. Smoking cessation and risk of age-related cataract in men. *JAMA.* 2000; 284(6): 713-6 as it appears in Ye J, He J, Wang C, Wu H, Shi X, Zhang H, Xie J, Lee SY. Smoking and risk of age-related cataract: a meta-analysis. *Invest Ophthalmol Vis Sci.* 2012; 53(12): 7133-40.

Christen WG, Glynn RJ, Manson JE, Ajani UA, Buring JE. A prospective study of cigarette smoking and risk of age-related macular degeneration in men. *JAMA.* 1996; 276(14): 1147-51 as it appears in Chakravarthy U, Wong TY, Fletcher A, Piau E, Evans C, Zlateva G, Buggage R, Pleil A, Mitchell P. Clinical risk factors for age-related macular degeneration in men. *JAMA.* 2000; 284(6): 713-6 as it appears in Ye J, He J, Wang C, Wu H, Shi X, Zhang H, Xie J, Lee SY. Smoking and risk of age-related cataract: a meta-analysis. *Invest Ophthalmol Vis Sci.* 2012; 53(12): 7133-40.

Costenbader KH, Feskanich D, Mandl LA, Karlson EW. Smoking Intensity, Duration, and Cessation, and the Risk of Rheumatoid Arthritis in Women. *Am J Med.* 2006; 119(6): 503e1-9 as it appears in Sugiyama D, Nishimura K, Tamaki K, Tsuji G, Nakazawa T, Morinobu A, Kumagai S. Impact of smoking as a risk factor for developing rheumatoid arthritis: a meta-analysis of 10 studies. *Arthritis Rheum.* 2007; 50(12): 3733-41.

Criswell LA, Merlino LA, Cerhan JR, Mikuls TR, Mudano AS, Burma M, Folsom AR, Saag KG. Cigarette Smoking and the Risk of Rheumatoid Arthritis among Postmenopausal Women: Results from the Iowa Women's Health Study. *Am J Med.* 2002; 112(6): 465-71 as it appears in Sugiyama D, Nishimura K, Tamaki K, Tsuji G, Nakazawa T, Morinobu A, Kumagai S. Impact of smoking as a risk factor for developing rheumatoid arthritis: a meta-analysis of 10 studies. *Arthritis Rheum.* 2007; 50(12): 3733-41.

Delcourt C, Carrière I, Delage M, Descomps B, Cristol JP, Papoz L. Associations of cataract with antioxidant enzymes and other risk factors: the French Age-Related Eye Diseases (POLA) Prospective Study. *Ophthalmology.* 2003; 110(12): 2318-26 as it appears in Ye J, He J, Wang C, Wu H, Shi X, Zhang H, Xie J, Lee SY. Smoking and risk of age-related cataract: a meta-analysis. *Invest Ophthalmol Vis Sci.* 2012; 53(12): 7133-40.

European Prospective Osteoporosis Study (EPOS) Group, Felsenberg D, Silman AJ, Lunt M, Armbrecht G, Ismail AA, Finn JD, Cockerill WC, Banzer D, Benevolenskaya LI, Bhalla A, Bruges Armas J, Cannata JB, Cooper C, Dequeker J, Eastell R, Felsch B, Gowin W, Havelka S, Hoszowski K, Jajic I, Janott J, Johnell O, Kanis JA, Kragl G, Lopes Vaz A, Lorenc R, Lyritis G, Masaryk P, Matthis C, Miazgowski T, Parisi G, Pols H a. P, Poor G, Raspe HH, Reid DM, Reisinger W, Schedit-Nave C, Stepan JJ, Todd CJ, Weber K, Woolf AD, Yershova OB, Reeve J, O'Neill TW. Incidence of vertebral fracture in europe: results from the European Prospective Osteoporosis Study (EPOS). *J Bone Miner Res.* 2002; 17(12): 2300-10.

European Prospective Osteoporosis Study (EPOS) Group, Felsenberg D, Silman AJ, Lunt M, Armbrecht G, Ismail AA, Finn JD, Cockerill WC, Banzer D, Benevolenskaya LI, Bhalla A, Bruges Armas J, Cannata JB, Cooper C, Dequeker J, Eastell R, Felsch B, Gowin W, Havelka S, Hoszowski K, Jajic I, Janott J, Johnell O, Kanis JA, Kragl G, Lopes Vaz A, Lorenc R, Lyritis G, Masaryk P, Matthis C, Miazgowski T, Parisi G, Pols H a. P, Poor G, Raspe HH, Reid DM, Reisinger W, Schedit-Nave C, Stepan JJ, Todd CJ, Weber K, Woolf AD, Yershova OB, Reeve J, O'Neill TW. Incidence of vertebral fracture in europe: results from the European Prospective Osteoporosis Study (EPOS). *J Bone Miner Res.* 2002; 17(12): 2300-10.

Fujiwara S, Kasagi F, Yamada M, Kodama K. Risk factors for hip fracture in a Japanese cohort. *J Bone Miner Res.* 1997; 12(7): 998-1004 as it appears in Vestergaard P, Mosekilde L. Fracture risk associated with smoking: a meta-analysis. *Am J Epidemiol.* 2003; 157(11): 957-64.

Heliövaara M, Aho K, Aromaa A, Knekt P, Reunanen A. Smoking and risk of rheumatoid arthritis. *J Rheumatol.* 1993; 20(11): 1830-5 as it appears in Sugiyama D, Nishimura K, Tamaki K, Tsuji G, Nakazawa T, Morinobu A, Kumagai S. Impact of smoking as a risk factor for developing rheumatoid arthritis: a meta-analysis of 10 studies. *Arthritis Rheum.* 2007; 50(12): 3733-41.

Hiller R, Sperduto RD, Podgor MJ, Wilson PW, Ferris FL 3rd, Colton T, D'Agostino RB, Roseman MJ, Stockman ME, Milton RC. Cigarette smoking and the risk of development of lens opacities. The Framingham studies. *Arch Ophthalmol.* 1997; 115(9): 1113-8 as it appears in Ye J, He J, Wang C, Wu H, Shi X, Zhang H, Xie J, Lee SY. Smoking and risk of age-related cataract: a meta-analysis. *Invest Ophthalmol Vis Sci.* 2012; 53(12): 7133-40.

Hofman A, Grobbee DE, de Jong PT, van den Ouweland FA. Determinants of disease and disability in the elderly: The Rotterdam Elderly Study. *Eur J Epidemiol.* 1991; 7(4): 403-22 as it appears in Vestergaard P, Mosekilde L. Fracture risk associated with smoking: a meta-analysis. *J Intern Med.* 2003; 254(6): 572-83.

---

### Relative Risk Citations

---

Hofman A, Grobbee DE, de Jong PT, van den Ouweland FA. Determinants of disease and disability in the elderly: The Rotterdam Elderly Study. *Eur J Epidemiol.* 1991; 7(4): 403-22 as it appears in Vestergaard P, Mosekilde L. Fracture risk associated with smoking: a meta-analysis. *J Intern Med.* 2003; 254(6): 572-83.

Honkanen R, Kröger H, Tuppurainen M, Alhava E, Saarikoski S. Fractures and low axial bone density in perimenopausal women. *J Clin Epidemiol.* 1995; 48(7): 881-8 as it appears in Vestergaard P, Mosekilde L. Fracture risk associated with smoking: a meta-analysis. *J Intern Med.* 2003; 254(6): 572-83.

Hozawa A, Houston T, Steffes MW, Widome R, Williams OD, Iribarren C, Pletcher MJ, Daviglius ML, Carr JJ, Jacobs DR. The association of cigarette smoking with self-reported disease before middle age: the Coronary Artery Risk Project. *Am J Epidemiol.* 2004; 160(10): 811-8 as it appears in Vestergaard P, Mosekilde L. Fracture risk associated with smoking: a meta-analysis. *J Intern Med.* 2003; 254(6): 572-83.

Johansson H, Oden A, Johnell O, Jonsson B, De Laet C, Oglesby A, McCloskey EV, Kayan J, Jalava T, Kanis JA. Optimization of BMD measurements to identify high risk groups for treatment--a test analysis. *J Bone Miner Res.* 2004; 19(6): 906-13 as it appears in Vestergaard P, Mosekilde L. Fracture risk associated with smoking: a meta-analysis. *J Intern Med.* 2003; 254(6): 572-83.

Johansson H, Oden A, Johnell O, Jonsson B, De Laet C, Oglesby A, McCloskey EV, Kayan J, Jalava T, Kanis JA. Optimization of BMD measurements to identify high risk groups for treatment--a test analysis. *J Bone Miner Res.* 2004; 19(6): 906-13 as it appears in Vestergaard P, Mosekilde L. Fracture risk associated with smoking: a meta-analysis. *J Intern Med.* 2003; 254(6): 572-83.

Jones G, Nguyen TV, Sambrook PN, Kelly PJ, Gilbert C, Eisman JA. Symptomatic fracture incidence in elderly men and women: the Dubbo Osteoporosis Epidemiology Study (DOES). *Osteoporos Int.* 1994; 4(5): 277-82 as it appears in Vestergaard P, Mosekilde L. Fracture risk associated with smoking: a meta-analysis. *J Intern Med.* 2003; 254(6): 572-83.

Karlsøn EW, Lee IM, Cook NR, Manson JE, Buring JE, Hennekens CH. A retrospective cohort study of cigarette smoking and risk of rheumatoid arthritis in female health professionals. *Arthritis Rheum.* 1999; 45(5): 910-7 as it appears in Sugiyama D, Nishimura K, Tamaki K, Tsuji G, Nakazawa T, Morinobu A, Kumagai S. Impact of smoking as a risk factor for developing rheumatoid arthritis: a meta-analysis of observational studies. *Ann Rheum Dis.* 2003; 62(11): 1203-8.

Klein BE, Klein R, Lee KE, Meuer SM. Socioeconomic and Lifestyle Factors and the 10-year Incidence of Age-related Cataracts. *Am J Ophthalmol.* 2003; 136(3): 506-12 as it appears in Ye J, He J, Wang C, Wu H, Shi X, Zhang H, Xie J, Lee SY. Smoking and risk of age-related cataract: a meta-analysis. *Invest Ophthalmol Vis Sci.* 2012; 53(7): 3885-95.

Klein R, Klein BE, Linton KL. Prevalence of age-related maculopathy. The Beaver Dam Eye Study. *Ophthalmology.* 1992; 99(6): 933-43 as it appears in Chakravarthy U, Wong TY, Fletcher A, Piau E, Evans C, Zlateva G, Buggage R, Pleil A, Mitchell P. Clinical risk factors for age-related macular degeneration: a systematic review and meta-analysis. *BMJ.* 2006; 333(7590): 972-83.

Kreiger N, Tenenhouse A, Joseph L, Mackenzie T, Poliquin S, Brown JP, Prior JC, Rittmaster RS. Research Notes: The Canadian Multicentre Osteoporosis Study (CaMos): Background, Rationale, Methods. *Can J Aging.* 1999; 18(3): 376-87 as it appears in Vestergaard P, Mosekilde L. Fracture risk associated with smoking: a meta-analysis. *J Intern Med.* 2003; 254(6): 572-83.

Kreiger N, Tenenhouse A, Joseph L, Mackenzie T, Poliquin S, Brown JP, Prior JC, Rittmaster RS. Research Notes: The Canadian Multicentre Osteoporosis Study (CaMos): Background, Rationale, Methods. *Can J Aging.* 1999; 18(3): 376-87 as it appears in Vestergaard P, Mosekilde L. Fracture risk associated with smoking: a meta-analysis. *J Intern Med.* 2003; 254(6): 572-83.

Kurata JH, Nogawa AN, Abbey DE, Petersen F. A prospective study of risk for peptic ulcer disease in Seventh-Day Adventists. *Gastroenterology.* 1992; 102(3): 902-9.

Leske MC, Chylack LT Jr, He Q, Wu SY, Schoenfeld E, Friend J, Wolfe J. Risk factors for nuclear opalescence in a longitudinal study. *Am J Epidemiol.* 1998; 147(1): 36-41 as it appears in Ye J, He J, Wang C, Wu H, Shi X, Zhang H, Xie J, Lee SY. Smoking and risk of age-related cataract: a meta-analysis. *Invest Ophthalmol Vis Sci.* 2012; 53(7): 3885-95.

Leske MC, Wu SY, Hennis A, Nemesure B, Yang L, Hyman L, Schachat AP; Barbados Eye Studies Group. Nine-year incidence of age-related macular degeneration in the Barbados Eye Studies. *Ophthalmology.* 2006; 113(1): 29-35 as it appears in Chakravarthy U, Wong TY, Fletcher A, Piau E, Evans C, Zlateva G, Buggage R, Pleil A, Mitchell P. Clinical risk factors for age-related macular degeneration: a systematic review and meta-analysis. *BMC Ophthalmol.* 2006; 6: 12.

Lindblad BE, Håkansson N, Svensson H, Philipson B, Wolk A. Intensity of Smoking and Smoking Cessation in Relation to Risk of Cataract Extraction: A Prospective Study of Women. *Am J Epidemiol.* 2005; 162(1): 73-9 as it appears in Ye J, He J, Wang C, Wu H, Shi X, Zhang H, Xie J, Lee SY. Smoking and risk of age-related cataract: a meta-analysis. *Invest Ophthalmol Vis Sci.* 2012; 53(7): 3885-95.

---

### Relative Risk Citations

---

Melton LJ, Crowson CS, O'Fallon WM, Wahner HW, Riggs BL. Relative contributions of bone density, bone turnover, and clinical risk factors to long-term fracture prediction. *J Bone Miner Res.* 2003; 18(2): 312-8 as it appears in Vestergaard P, Mosekilde L. Fracture risk associated with smoking: a meta-analysis. *J Intern Med.* 2003;

Melton LJ, Crowson CS, O'Fallon WM, Wahner HW, Riggs BL. Relative contributions of bone density, bone turnover, and clinical risk factors to long-term fracture prediction. *J Bone Miner Res.* 2003; 18(2): 312-8 as it appears in Vestergaard P, Mosekilde L. Fracture risk associated with smoking: a meta-analysis. *J Intern Med.* 2003;

Mukesh BN, Le A, Dimitrov PN, Ahmed S, Taylor HR, McCarty CA. Development of cataract and associated risk factors: the Visual Impairment Project. *Arch Ophthalmol.* 2006; 124(1): 79-85 as it appears in Ye J, He J, Wang C, Wu H, Shi X, Zhang H, Xie J, Lee SY. Smoking and risk of age-related cataract: a meta-analysis. *Invest Ophthalmol*

Oza S, Thun MJ, Henley SJ, Lopez AD, Ezzati M. How many deaths are attributable to smoking in the United States? Comparison of methods for estimating smoking-attributable mortality when smoking prevalence changes. *Paffenbarger RS, Wing AL, Hyde RT. Chronic disease in former college students; 13. Early precursors of peptic*

Schoon IM, Mellstrom D, Oden A, Ytterberg BO. Peptic ulcer disease in older age groups in Gothenburg in 1985: the association with smoking. *Age Ageing.* 1991; 20(5): 371-6.

Stenstrom M, Olsson JO, Mellstrom D. Thyroid hormone replacement is not related to increased risk of osteoporosis. *Osteoporos Int.* 2000; 11(Suppl. 2): S144 as it appears in Vestergaard P, Mosekilde L. Fracture risk

Stenstrom M, Olsson JO, Mellstrom D. Thyroid hormone replacement is not related to increased risk of osteoporosis. *Osteoporos Int.* 2000; 11(Suppl. 2): S144 as it appears in Vestergaard P, Mosekilde L. Fracture risk

Svanborg A. Seventy-year-old people in Gothenburg a population study in an industrialized Swedish city. II. General presentation of social and medical conditions. *Acta Med Scand.* 1977; 611(Suppl 5): 5-37 as it appears in Vestergaard P, Mosekilde L. Fracture risk associated with smoking: a meta-analysis. *J Intern Med.* 2003; 254(6):

Tan JS, Wang JJ, Younan C, Cumming RG, Rochtchina E, Mitchell P. Smoking and the long-term incidence of cataract: the Blue Mountains Eye Study. *Ophthalmic Epidemiol.* 2008; 15(3): 155-61 as it appears in Ye J, He J, Wang C, Wu H, Shi X, Zhang H, Xie J, Lee SY. Smoking and risk of age-related cataract: a meta-analysis. *Invest*

Tomany SC, Wang JJ, Van Leeuwen R, Klein R, Mitchell P, Vingerling JR, Klein BE, Smith W, De Jong PT. Risk factors for incident age-related macular degeneration: pooled findings from 3 continents. *Ophthalmology.* 2004; 111(7): 1280-7 as it appears in Chakravarthy U, Wong TY, Fletcher A, Pault E, Evans C, Zlateva G, Buggage R, Pleil A, Mitchell P. Clinical risk factors for age-related macular degeneration: a systematic review and meta-analysis. *BMC*

Vessey MP, Villard-Mackintosh L, Yeates D. Oral Contraceptives, cigarette smoking and other factors in relation to arthritis. *Contraception.* 1987; 35(5): 457-64 as it appears in Sugiyama D, Nishimura K, Tamaki K, Tsuji G, Nakazawa T, Morinobu A, Kumagai S. Impact of smoking as a risk factor for developing rheumatoid arthritis: a

Weintraub JM, Willett WC, Rosner B, Colditz GA, Seddon JM, Hankinson SE. Smoking Cessation and Risk of Cataract Extraction among US Women and Men. *Am J Epidemiol.* 2002; 155(1): 72-9 as it appears in Ye J, He J, Wang C, Wu H, Shi X, Zhang H, Xie J, Lee SY. Smoking and risk of age-related cataract: a meta-analysis. *Invest*

West S, Muñoz B, Schein OD, Vitale S, Maguire M, Taylor HR, Bressler NM. Cigarette smoking and risk for progression of nuclear opacities. *Arch Ophthalmol.* 1995; 113(11): 1377-80 as it appears in Ye J, He J, Wang C, Wu H, Shi X, Zhang H, Xie J, Lee SY. Smoking and risk of age-related cataract: a meta-analysis. *Invest Ophthalmol Vis*

West S, Muñoz B, Schein OD, Vitale S, Maguire M, Taylor HR, Bressler NM. Cigarette smoking and risk for progression of nuclear opacities. *Arch Ophthalmol.* 1995; 113(11): 1377-80 as it appears in Ye J, He J, Wang C, Wu H, Shi X, Zhang H, Xie J, Lee SY. Smoking and risk of age-related cataract: a meta-analysis. *Invest Ophthalmol Vis*

---

| Table S3                                   | Daily | Current | Occasional | Number of Data Points |
|--------------------------------------------|-------|---------|------------|-----------------------|
| <b>Smoked Tobacco</b>                      | 59250 | 19692   | 6717       | 85659                 |
| <b>Cigarettes</b>                          | 13636 | 20378   | 9342       | 43356                 |
| <b>Manufactured Cigarettes</b>             | 5036  | 7375    | 4286       | 16697                 |
| <b>Hand-Rolled Cigarettes</b>              | 4865  | 8045    | 4620       | 17530                 |
| <b>All Tobacco</b>                         | 2793  | 7775    | 1225       | 11793                 |
| <b>Smoked Tobacco Excluding Cigarettes</b> | 2231  | 11696   | 2146       | 16073                 |
| <b>Smokeless Tobacco</b>                   | 1612  | 5566    | 1167       | 8345                  |
| <b>All Tobacco Excluding Cigarettes</b>    | 221   | 623     | 188        | 1032                  |
| <b>Number of Data Points</b>               | 89644 | 81150   | 29691      | 200485                |

Table S4

| <b>Frequency-Type Combination</b>      | <b>Adjustment<br/>(95% CI)</b> | <b>Adjusted R-<br/>Squared</b> | <b>Number of Data<br/>Points</b> |
|----------------------------------------|--------------------------------|--------------------------------|----------------------------------|
| <b>Daily - Smoked Tobacco</b>          | -                              | -                              | 59,250                           |
| <b>Current - Smoked Tobacco</b>        | 0.831<br>(0.826, 0.836)        | 0.971                          | 13,658                           |
| <b>Daily - Cigarettes</b>              | 1.077<br>(1.052, 1.102)        | 0.918                          | 7,097                            |
| <b>Current - All Tobacco</b>           | 0.659<br>(0.642, 0.675)        | 0.855                          | 2,096                            |
| <b>Daily - All Tobacco</b>             | 0.742<br>(0.723, 0.760)        | 0.853                          | 562                              |
| <b>Daily - Manufactured Cigarettes</b> | 1.132<br>(1.089, 1.175)        | 0.849                          | 11                               |
| <b>Current*</b>                        | 0.852<br>(0.849, 0.855)        | 0.972                          | 5,439                            |
| <b>Cigarettes*</b>                     | 1.107<br>(1.090, 1.124)        | 0.854                          | 5,493                            |

Table S5

| Outcome                                             | Exposure                 | Prospective observational studies (n) | Prospective observational studies with significant association in the opposite direction (%) | Lower limit of RR > 1.5 | Biologic plausibility | Analogy |
|-----------------------------------------------------|--------------------------|---------------------------------------|----------------------------------------------------------------------------------------------|-------------------------|-----------------------|---------|
| Tuberculosis                                        | 5-year lagged prevalence | 4                                     | 0                                                                                            | ●                       | ●                     | ●       |
| Lower respiratory infections <sup>1</sup>           | 5-year lagged prevalence | 0                                     | ..                                                                                           | ●                       | ●                     | ●       |
| Lip and oral cavity cancer                          | Smoking impact ratio     | 3                                     | 0                                                                                            | ●                       | ●                     | ●       |
| Nasopharynx cancer <sup>2</sup>                     | Smoking impact ratio     | 3                                     | 0                                                                                            | ●                       | ●                     | ●       |
| Oesophageal cancer                                  | Smoking impact ratio     | 5                                     | 0                                                                                            | ●                       | ●                     | ●       |
| Larynx cancer                                       | Smoking impact ratio     | 4                                     | 0                                                                                            | ●                       | ●                     | ●       |
| Stomach cancer                                      | Smoking impact ratio     | 9                                     | 0                                                                                            | ●                       | ●                     | ●       |
| Colon and rectum cancer                             | Smoking impact ratio     | 19                                    | 0                                                                                            | ●                       | ●                     | ●       |
| Liver cancer <sup>3</sup>                           | Smoking impact ratio     | 54                                    | 0                                                                                            | ●                       | ●                     | ●       |
| Pancreatic cancer                                   | Smoking impact ratio     | 13                                    | 0                                                                                            | ●                       | ●                     | ●       |
| Tracheal, bronchus, and lung cancer                 | Smoking impact ratio     | 38                                    | 0                                                                                            | ●                       | ●                     | ●       |
| Cervical cancer                                     | Smoking impact ratio     | 15                                    | 0                                                                                            | ●                       | ●                     | ●       |
| Kidney cancer                                       | Smoking impact ratio     | 8                                     | 0                                                                                            | ●                       | ●                     | ●       |
| Bladder cancer <sup>4</sup>                         | Smoking impact ratio     | 17                                    | 0                                                                                            | ●                       | ●                     | ●       |
| Leukaemia                                           | Smoking impact ratio     | 14                                    | 0                                                                                            | ●                       | ●                     | ●       |
| Ischaemic heart disease                             | 5-year lagged prevalence | 86                                    | ..                                                                                           | ●                       | ●                     | ●       |
| Ischemic stroke                                     | 5-year lagged prevalence | 60                                    | ..                                                                                           | ●                       | ●                     | ●       |
| Hemorrhagic stroke                                  | 5-year lagged prevalence | 60                                    | ..                                                                                           | ●                       | ●                     | ●       |
| Hypertensive heart disease                          | 5-year lagged prevalence | 5                                     | ..                                                                                           | ●                       | ●                     | ●       |
| Atrial fibrillation and flutter                     | 5-year lagged prevalence | 16                                    | 0                                                                                            | ●                       | ●                     | ●       |
| Aortic aneurysm                                     | 5-year lagged prevalence | 10                                    | 0                                                                                            | ●                       | ●                     | ●       |
| Peripheral vascular disease                         | 5-year lagged prevalence | 10                                    | 0                                                                                            | ●                       | ●                     | ●       |
| Other cardiovascular and circulatory diseases       | 5-year lagged prevalence | 1                                     | 0                                                                                            | ●                       | ●                     | ●       |
| Chronic obstructive pulmonary disease               | Smoking impact ratio     | 42                                    | 0                                                                                            | ●                       | ●                     | ●       |
| Silicosis                                           | Smoking impact ratio     | 0                                     | ..                                                                                           | ●                       | ●                     | ●       |
| Asbestosis <sup>5</sup>                             | Smoking impact ratio     | 0                                     | ..                                                                                           | ●                       | ●                     | ●       |
| Coal workers pneumoconiosis                         | Smoking impact ratio     | 0                                     | ..                                                                                           | ●                       | ●                     | ●       |
| Other pneumoconiosis                                | Smoking impact ratio     | 0                                     | ..                                                                                           | ●                       | ●                     | ●       |
| Asthma                                              | 5-year lagged prevalence | 6                                     | 0                                                                                            | ●                       | ●                     | ●       |
| Interstitial lung disease and pulmonary sarcoidosis | Smoking impact ratio     | 0                                     | ..                                                                                           | ●                       | ●                     | ●       |
| Other chronic respiratory diseases                  | Smoking impact ratio     | 1                                     | 0                                                                                            | ●                       | ●                     | ●       |
| Peptic ulcer disease                                | 5-year lagged prevalence | 7                                     | 0                                                                                            | ●                       | ●                     | ●       |
| Diabetes mellitus                                   | 5-year lagged prevalence | 51                                    | 0                                                                                            | ●                       | ●                     | ●       |

| Outcome              | Exposure                 | Prospective observational studies (n) | Prospective observational studies with significant association in the opposite direction (%) | Lower limit of RR > 1.5 | Biologic plausibility | Analogy |
|----------------------|--------------------------|---------------------------------------|----------------------------------------------------------------------------------------------|-------------------------|-----------------------|---------|
| Cataract             | 5-year lagged prevalence | 10                                    | 0                                                                                            | ●                       | ●                     | ●       |
| Macular degeneration | 5-year lagged prevalence | 5                                     | 20                                                                                           | ●                       | ●                     | ●       |
| Rheumatoid arthritis | 5-year lagged prevalence | 5                                     | 0                                                                                            | ●                       | ●                     | ●       |
| Hip fracture         | 5-year lagged prevalence | 15                                    | 20                                                                                           | ●                       | ●                     | ●       |
| Non-hip fracture     | 5-year lagged prevalence | 14                                    | 14                                                                                           | ●                       | ●                     | ●       |

● Yes  
● No

**Footnotes**

- 1 Evidence on the relationship between smoking and lower respiratory infections comes 10 case-control or cross-sectional studies
- 2 The evidence on causal relationship of alcohol and smoking with nasopharynx cancer was from the studies evaluating oral cavity and pharyngeal cancers as outcome
- 3 Liver cancer included liver cancer due to alcohol use, hepatitis B, hepatitis C, and other causes
- 4 The evidence on causal relationship of smoking and bladder cancer was based on the studies evaluating the lower urinary tract as outcome
- 5 Asbestosis, coal workers pneumoconiosis, other pneumoconiosis, silicosis were included as outcomes for smoking as they were included in the other chronic respiratory diseases category

Table S6

| <b>Outcome</b>                            | <b>Citation</b>                                                                                                                                                                                                                              |
|-------------------------------------------|----------------------------------------------------------------------------------------------------------------------------------------------------------------------------------------------------------------------------------------------|
| <b>Tuberculosis</b>                       | Bates MN, Khalakdina A, Pai M, Chang L, Lessa F, Smith KR. Risk of tuberculosis from exposure to tobacco smoke: a systematic review and meta-analysis. <i>Arch Intern Med</i> 2007; 167: 335–42.                                             |
| <b>Tuberculosis</b>                       | Lin H-H, Ezzati M, Murray M. Tobacco smoke, indoor air pollution and tuberculosis: a systematic review and meta-analysis. <i>PLoS Med</i> 2007; 4: e20.                                                                                      |
| <b>Tuberculosis</b>                       | Slama K, Chiang C-Y, Enarson DA, et al. Tobacco and tuberculosis: a qualitative systematic review and meta-analysis. <i>Int J Tuberc Lung Dis</i> 2007; 11: 1049–61.                                                                         |
| <b>Lower respiratory infections</b>       | Surgeon General's Report - The Health Consequences of Smoking. U.S. Department of Health & Human Services, 2004<br><a href="http://www.cdc.gov/tobacco/data_statistics/sgr/2004/">http://www.cdc.gov/tobacco/data_statistics/sgr/2004/</a> . |
| <b>Lip and oral cavity cancer</b>         | Surgeon General's Report - The Health Consequences of Smoking. U.S. Department of Health & Human Services, 2004<br><a href="http://www.cdc.gov/tobacco/data_statistics/sgr/2004/">http://www.cdc.gov/tobacco/data_statistics/sgr/2004/</a> . |
| <b>Nasopharynx cancer</b>                 | Surgeon General's Report - The Health Consequences of Smoking. U.S. Department of Health & Human Services, 2004<br><a href="http://www.cdc.gov/tobacco/data_statistics/sgr/2004/">http://www.cdc.gov/tobacco/data_statistics/sgr/2004/</a> . |
| <b>Oesophageal cancer</b>                 | Surgeon General's Report - The Health Consequences of Smoking. U.S. Department of Health & Human Services, 2004<br><a href="http://www.cdc.gov/tobacco/data_statistics/sgr/2004/">http://www.cdc.gov/tobacco/data_statistics/sgr/2004/</a> . |
| <b>Stomach cancer</b>                     | Surgeon General's Report - The Health Consequences of Smoking. U.S. Department of Health & Human Services, 2004<br><a href="http://www.cdc.gov/tobacco/data_statistics/sgr/2004/">http://www.cdc.gov/tobacco/data_statistics/sgr/2004/</a> . |
| <b>Colon and rectum cancer</b>            | Surgeon General's Report - The Health Consequences of Smoking. U.S. Department of Health & Human Services, 2004<br><a href="http://www.cdc.gov/tobacco/data_statistics/sgr/2004/">http://www.cdc.gov/tobacco/data_statistics/sgr/2004/</a> . |
| <b>Liver cancer</b>                       | Surgeon General's Report - The Health Consequences of Smoking. U.S. Department of Health & Human Services, 2004<br><a href="http://www.cdc.gov/tobacco/data_statistics/sgr/2004/">http://www.cdc.gov/tobacco/data_statistics/sgr/2004/</a> . |
| <b>Pancreatic cancer</b>                  | Surgeon General's Report - The Health Consequences of Smoking. U.S. Department of Health & Human Services, 2004<br><a href="http://www.cdc.gov/tobacco/data_statistics/sgr/2004/">http://www.cdc.gov/tobacco/data_statistics/sgr/2004/</a> . |
| <b>Larynx cancer</b>                      | International Agency for Research on Cancer Working Group on the Evaluation of Carcinogenic Risks to Humans. IARC monographs on the evaluation of carcinogenic risks to humans: Tobacco Smoke and Involuntary Smoking. Lyon: IARC, 2004.     |
| <b>Tracheal, bronchus and lung cancer</b> | International Agency for Research on Cancer Working Group on the Evaluation of Carcinogenic Risks to Humans. IARC monographs on the evaluation of carcinogenic risks to humans: Tobacco Smoke and Involuntary Smoking. Lyon: IARC, 2004.     |
| <b>Cervical cancer</b>                    | International Agency for Research on Cancer Working Group on the Evaluation of Carcinogenic Risks to Humans. IARC monographs on the evaluation of carcinogenic risks to humans: Tobacco Smoke and Involuntary Smoking. Lyon: IARC, 2004.     |



|                                                      |                                                                                                                                                                                                                                                                                                    |
|------------------------------------------------------|----------------------------------------------------------------------------------------------------------------------------------------------------------------------------------------------------------------------------------------------------------------------------------------------------|
| <b>Kidney cancer</b>                                 | International Agency for Research on Cancer Working Group on the Evaluation of Carcinogenic Risks to Humans. IARC monographs on the evaluation of carcinogenic risks to humans: Tobacco Smoke and Involuntary Smoking. Lyon: IARC, 2004.                                                           |
| <b>Bladder cancer</b>                                | International Agency for Research on Cancer Working Group on the Evaluation of Carcinogenic Risks to Humans. IARC monographs on the evaluation of carcinogenic risks to humans: Tobacco Smoke and Involuntary Smoking. Lyon: IARC, 2004.                                                           |
| <b>Leukaemia</b>                                     | Surgeon General’s Report - The Health Consequences of Smoking. U.S. Department of Health & Human Services, 2004<br><a href="http://www.cdc.gov/tobacco/data_statistics/sgr/2004/">http://www.cdc.gov/tobacco/data_statistics/sgr/2004/</a> .                                                       |
| <b>Ischaemic heart disease</b>                       | Huxley RR, Woodward M. Cigarette smoking as a risk factor for coronary heart disease in women compared with men: a systematic review and meta-analysis of prospective cohort studies. <i>Lancet</i> 2011; 378: 1297–305.                                                                           |
| <b>Cerebrovascular disease</b>                       | Peters SAE, Huxley RR, Woodward M. Smoking as a risk factor for stroke in women compared with men: a systematic review and meta-analysis of 81 cohorts, including 3,980,359 individuals and 42,401 strokes. <i>Stroke</i> 2013; 44: 2821–8.                                                        |
| <b>Hypertensive heart disease</b>                    | Carter BD, Abnet CC, Feskanich D, et al. Smoking and mortality--beyond established causes. <i>N Engl J Med</i> 2015; 372: 631–40.                                                                                                                                                                  |
| <b>Atrial fibrillation and flutter</b>               | Zhu W, Yuan P, Shen Y, Wan R, Hong K. Association of smoking with the risk of incident atrial fibrillation: A meta-analysis of prospective studies. <i>Int J Cardiol</i> 2016; 218: 259–66.                                                                                                        |
| <b>Aortic aneurysm</b>                               | Lederle FA, Nelson DB, Joseph AM. Smokers’ relative risk for aortic aneurysm compared with other smoking-related diseases: a systematic review. <i>J Vasc Surg</i> 2003; 38: 329–34.                                                                                                               |
| <b>Peripheral vascular disease</b>                   | Lu L, Mackay DF, Pell JP. Meta-analysis of the association between cigarette smoking and peripheral arterial disease. <i>Heart</i> 2014; 100: 414–23.                                                                                                                                              |
| <b>Other cardiovascular and circulatory diseases</b> | Carter BD, Abnet CC, Feskanich D, et al. Smoking and mortality--beyond established causes. <i>N Engl J Med</i> 2015; 372: 631–40.                                                                                                                                                                  |
| <b>Chronic obstructive pulmonary disease</b>         | Forey BA, Thornton AJ, Lee PN. Systematic review with meta-analysis of the epidemiological evidence relating smoking to COPD, chronic bronchitis and emphysema. <i>BMC Pulm Med</i> 2011; 11: 36.                                                                                                  |
| <b>Asthma</b>                                        | The Health Consequences of Smoking—50 Years of Progress. U.S. Department of Health & Human Services, 2014<br><a href="http://www.surgeongeneral.gov/library/reports/50-years-of-progress/full-report.pdf">http://www.surgeongeneral.gov/library/reports/50-years-of-progress/full-report.pdf</a> . |
| <b>Other chronic respiratory diseases</b>            | Carter BD, Abnet CC, Feskanich D, et al. Smoking and mortality--beyond established causes. <i>N Engl J Med</i> 2015; 372: 631–40.                                                                                                                                                                  |

|                             |                                                                                                                                                                                                                                                                                                    |
|-----------------------------|----------------------------------------------------------------------------------------------------------------------------------------------------------------------------------------------------------------------------------------------------------------------------------------------------|
| <b>Peptic ulcer disease</b> | Kurata JH, Nogawa AN. Meta-analysis of risk factors for peptic ulcer. Nonsteroidal antiinflammatory drugs, Helicobacter pylori, and smoking. <i>J Clin Gastroenterol</i> 1997; 24: 2–17.                                                                                                           |
| <b>Diabetes mellitus</b>    | The Health Consequences of Smoking—50 Years of Progress. U.S. Department of Health & Human Services, 2014<br><a href="http://www.surgeongeneral.gov/library/reports/50-years-of-progress/full-report.pdf">http://www.surgeongeneral.gov/library/reports/50-years-of-progress/full-report.pdf</a> . |
| <b>Rheumatoid arthritis</b> | Sugiyama D, Nishimura K, Tamaki K, et al. Impact of smoking as a risk factor for developing rheumatoid arthritis: a meta-analysis of observational studies. <i>Ann Rheum Dis</i> 2010; 69: 70–81.                                                                                                  |
| <b>Cataract</b>             | Ye J, He J, Wang C, et al. Smoking and risk of age-related cataract: a meta-analysis. <i>Invest Ophthalmol Vis Sci</i> 2012; 53: 3885–95.                                                                                                                                                          |
| <b>Macular degeneration</b> | Chakravarthy U, Wong TY, Fletcher A, et al. Clinical risk factors for age-related macular degeneration: a systematic review and meta-analysis. <i>BMC Ophthalmol</i> 2010; 10: 31.                                                                                                                 |
| <b>Hip fracture</b>         | Vestergaard P, Mosekilde L. Fracture risk associated with smoking: a meta-analysis. <i>J Intern Med</i> 2003; 254: 572–83.                                                                                                                                                                         |
| <b>Non-hip fracture</b>     | Vestergaard P, Mosekilde L. Fracture risk associated with smoking: a meta-analysis. <i>J Intern Med</i> 2003; 254: 572–83.                                                                                                                                                                         |

Table S7

|                                               | Sex    | 30-34 years               | 35-39 years               | 40-44 years               | 45-49 years               | 50-54 years               | 55-59 years               | 60-64 years               |
|-----------------------------------------------|--------|---------------------------|---------------------------|---------------------------|---------------------------|---------------------------|---------------------------|---------------------------|
| Tuberculosis                                  | Male   | 1.588<br>(1.242 to 2.039) | 1.588<br>(1.242 to 2.039) | 1.588<br>(1.242 to 2.039) | 1.588<br>(1.242 to 2.039) | 1.588<br>(1.242 to 2.039) | 1.588<br>(1.242 to 2.039) | 1.588<br>(1.242 to 2.039) |
| Tuberculosis                                  | Female | 1.599<br>(1.258 to 2.024) | 1.599<br>(1.258 to 2.024) | 1.599<br>(1.258 to 2.024) | 1.599<br>(1.258 to 2.024) | 1.599<br>(1.258 to 2.024) | 1.599<br>(1.258 to 2.024) | 1.599<br>(1.258 to 2.024) |
| Ischaemic heart disease                       | Male   | 4.316<br>(3.127 to 5.810) | 3.924<br>(2.905 to 5.186) | 3.569<br>(2.699 to 4.630) | 3.246<br>(2.508 to 4.133) | 2.952<br>(2.330 to 3.689) | 2.685<br>(2.165 to 3.293) | 2.443<br>(2.011 to 2.940) |
| Ischaemic heart disease                       | Female | 6.145<br>(5.060 to 7.413) | 5.464<br>(4.557 to 6.515) | 4.859<br>(4.105 to 5.725) | 4.321<br>(3.697 to 5.031) | 3.843<br>(3.330 to 4.421) | 3.417<br>(2.999 to 3.885) | 3.039<br>(2.701 to 3.414) |
| Ischaemic stroke                              | Male   | 4.175<br>(3.165 to 5.452) | 3.805<br>(2.939 to 4.887) | 3.468<br>(2.728 to 4.381) | 3.161<br>(2.533 to 3.927) | 2.882<br>(2.351 to 3.520) | 2.627<br>(2.183 to 3.155) | 2.395<br>(2.026 to 2.828) |
| Ischaemic stroke                              | Female | 6.020<br>(4.248 to 8.410) | 5.357<br>(3.869 to 7.331) | 4.767<br>(3.525 to 6.390) | 4.243<br>(3.211 to 5.569) | 3.777<br>(2.925 to 4.855) | 3.363<br>(2.664 to 4.231) | 2.994<br>(2.427 to 3.688) |
| Hemorrhagic stroke                            | Male   | 4.175<br>(3.165 to 5.452) | 3.805<br>(2.939 to 4.887) | 3.468<br>(2.728 to 4.381) | 3.161<br>(2.533 to 3.927) | 2.882<br>(2.351 to 3.520) | 2.627<br>(2.183 to 3.155) | 2.395<br>(2.026 to 2.828) |
| Hemorrhagic stroke                            | Female | 6.020<br>(4.248 to 8.410) | 5.357<br>(3.869 to 7.331) | 4.767<br>(3.525 to 6.390) | 4.243<br>(3.211 to 5.569) | 3.777<br>(2.925 to 4.855) | 3.363<br>(2.664 to 4.231) | 2.994<br>(2.427 to 3.688) |
| Hypertensive heart disease                    | Male   | 4.153<br>(2.995 to 5.659) | 3.785<br>(2.790 to 5.061) | 3.451<br>(2.600 to 4.525) | 3.146<br>(2.422 to 4.046) | 2.868<br>(2.257 to 3.618) | 2.616<br>(2.102 to 3.236) | 2.386<br>(1.959 to 2.893) |
| Hypertensive heart disease                    | Female | 4.110<br>(2.053 to 7.209) | 3.740<br>(1.960 to 6.346) | 3.405<br>(1.871 to 5.587) | 3.102<br>(1.786 to 4.919) | 2.826<br>(1.705 to 4.330) | 2.576<br>(1.628 to 3.812) | 2.350<br>(1.554 to 3.356) |
| Atrial fibrillation and flutter               | Male   | 4.153<br>(2.995 to 5.659) | 3.785<br>(2.790 to 5.061) | 3.451<br>(2.600 to 4.525) | 3.146<br>(2.422 to 4.046) | 2.868<br>(2.257 to 3.618) | 2.616<br>(2.102 to 3.236) | 2.386<br>(1.959 to 2.893) |
| Atrial fibrillation and flutter               | Female | 4.110<br>(2.053 to 7.209) | 3.740<br>(1.960 to 6.346) | 3.405<br>(1.871 to 5.587) | 3.102<br>(1.786 to 4.919) | 2.826<br>(1.705 to 4.330) | 2.576<br>(1.628 to 3.812) | 2.350<br>(1.554 to 3.356) |
| Aortic aneurysm                               | Male   | 4.153<br>(2.995 to 5.659) | 3.785<br>(2.790 to 5.061) | 3.451<br>(2.600 to 4.525) | 3.146<br>(2.422 to 4.046) | 2.868<br>(2.257 to 3.618) | 2.616<br>(2.102 to 3.236) | 2.386<br>(1.959 to 2.893) |
| Aortic aneurysm                               | Female | 4.110<br>(2.053 to 7.209) | 3.740<br>(1.960 to 6.346) | 3.405<br>(1.871 to 5.587) | 3.102<br>(1.786 to 4.919) | 2.826<br>(1.705 to 4.330) | 2.576<br>(1.628 to 3.812) | 2.350<br>(1.554 to 3.356) |
| Peripheral vascular disease                   | Male   | 4.153<br>(2.995 to 5.659) | 3.785<br>(2.790 to 5.061) | 3.451<br>(2.600 to 4.525) | 3.146<br>(2.422 to 4.046) | 2.868<br>(2.257 to 3.618) | 2.616<br>(2.102 to 3.236) | 2.386<br>(1.959 to 2.893) |
| Peripheral vascular disease                   | Female | 4.110<br>(2.053 to 7.209) | 3.740<br>(1.960 to 6.346) | 3.405<br>(1.871 to 5.587) | 3.102<br>(1.786 to 4.919) | 2.826<br>(1.705 to 4.330) | 2.576<br>(1.628 to 3.812) | 2.350<br>(1.554 to 3.356) |
| Other cardiovascular and circulatory diseases | Male   | 4.153<br>(2.995 to 5.659) | 3.785<br>(2.790 to 5.061) | 3.451<br>(2.600 to 4.525) | 3.146<br>(2.422 to 4.046) | 2.868<br>(2.257 to 3.618) | 2.616<br>(2.102 to 3.236) | 2.386<br>(1.959 to 2.893) |
| Other cardiovascular and circulatory diseases | Female | 4.110<br>(2.053 to 7.209) | 3.740<br>(1.960 to 6.346) | 3.405<br>(1.871 to 5.587) | 3.102<br>(1.786 to 4.919) | 2.826<br>(1.705 to 4.330) | 2.576<br>(1.628 to 3.812) | 2.350<br>(1.554 to 3.356) |
| Asthma                                        | Male   | 2.098<br>(1.761 to 2.460) | 2.098<br>(1.761 to 2.460) | 2.098<br>(1.761 to 2.460) | 2.098<br>(1.761 to 2.460) | 2.098<br>(1.761 to 2.460) | 2.098<br>(1.761 to 2.460) | 2.098<br>(1.761 to 2.460) |
| Asthma                                        | Female | 1.976<br>(1.788 to 2.181) | 1.976<br>(1.788 to 2.181) | 1.976<br>(1.788 to 2.181) | 1.976<br>(1.788 to 2.181) | 1.976<br>(1.788 to 2.181) | 1.976<br>(1.788 to 2.181) | 1.976<br>(1.788 to 2.181) |
| Peptic ulcer disease                          | Both   | 2.040<br>(1.684 to 2.483) | 2.040<br>(1.684 to 2.483) | 2.040<br>(1.684 to 2.483) | 2.040<br>(1.684 to 2.483) | 2.040<br>(1.684 to 2.483) | 2.040<br>(1.684 to 2.483) | 2.040<br>(1.684 to 2.483) |
| Diabetes mellitus                             | Male   | 1.426<br>(1.094 to 1.842) | 1.426<br>(1.094 to 1.842) | 1.426<br>(1.094 to 1.842) | 1.426<br>(1.094 to 1.842) | 1.426<br>(1.094 to 1.842) | 1.426<br>(1.094 to 1.842) | 1.426<br>(1.094 to 1.842) |

|                                               | Sex    | 65-69 years               | 70-74 years               | 75-79 years               | 80+ years                 |
|-----------------------------------------------|--------|---------------------------|---------------------------|---------------------------|---------------------------|
| Tuberculosis                                  | Male   | 1.588<br>(1.242 to 2.039) | 1.588<br>(1.242 to 2.039) | 1.588<br>(1.242 to 2.039) | 1.588<br>(1.242 to 2.039) |
| Tuberculosis                                  | Female | 1.599<br>(1.258 to 2.024) | 1.599<br>(1.258 to 2.024) | 1.599<br>(1.258 to 2.024) | 1.599<br>(1.258 to 2.024) |
| Ischaemic heart disease                       | Male   | 2.223<br>(1.869 to 2.624) | 2.023<br>(1.736 to 2.343) | 1.841<br>(1.613 to 2.091) | 1.598<br>(1.445 to 1.764) |
| Ischaemic heart disease                       | Female | 2.703<br>(2.433 to 3.000) | 2.404<br>(2.191 to 2.636) | 2.139<br>(1.974 to 2.317) | 1.794<br>(1.687 to 1.908) |
| Ischaemic stroke                              | Male   | 2.184<br>(1.881 to 2.535) | 1.992<br>(1.746 to 2.272) | 1.816<br>(1.621 to 2.036) | 1.582<br>(1.450 to 1.728) |
| Ischaemic stroke                              | Female | 2.666<br>(2.210 to 3.215) | 2.375<br>(2.014 to 2.802) | 2.115<br>(1.834 to 2.442) | 1.778<br>(1.595 to 1.988) |
| Hemorrhagic stroke                            | Male   | 2.184<br>(1.881 to 2.535) | 1.992<br>(1.746 to 2.272) | 1.816<br>(1.621 to 2.036) | 1.582<br>(1.450 to 1.728) |
| Hemorrhagic stroke                            | Female | 2.666<br>(2.210 to 3.215) | 2.375<br>(2.014 to 2.802) | 2.115<br>(1.834 to 2.442) | 1.778<br>(1.595 to 1.988) |
| Hypertensive heart disease                    | Male   | 2.176<br>(1.825 to 2.587) | 1.985<br>(1.700 to 2.313) | 1.811<br>(1.584 to 2.069) | 1.578<br>(1.425 to 1.749) |
| Hypertensive heart disease                    | Female | 2.144<br>(1.484 to 2.954) | 1.957<br>(1.416 to 2.601) | 1.787<br>(1.352 to 2.290) | 1.560<br>(1.261 to 1.891) |
| Atrial fibrillation and flutter               | Male   | 2.176<br>(1.825 to 2.587) | 1.985<br>(1.700 to 2.313) | 1.811<br>(1.584 to 2.069) | 1.578<br>(1.425 to 1.749) |
| Atrial fibrillation and flutter               | Female | 2.144<br>(1.484 to 2.954) | 1.957<br>(1.416 to 2.601) | 1.787<br>(1.352 to 2.290) | 1.560<br>(1.261 to 1.891) |
| Aortic aneurysm                               | Male   | 2.176<br>(1.825 to 2.587) | 1.985<br>(1.700 to 2.313) | 1.811<br>(1.584 to 2.069) | 1.578<br>(1.425 to 1.749) |
| Aortic aneurysm                               | Female | 2.144<br>(1.484 to 2.954) | 1.957<br>(1.416 to 2.601) | 1.787<br>(1.352 to 2.290) | 1.560<br>(1.261 to 1.891) |
| Peripheral vascular disease                   | Male   | 2.176<br>(1.825 to 2.587) | 1.985<br>(1.700 to 2.313) | 1.811<br>(1.584 to 2.069) | 1.578<br>(1.425 to 1.749) |
| Peripheral vascular disease                   | Female | 2.144<br>(1.484 to 2.954) | 1.957<br>(1.416 to 2.601) | 1.787<br>(1.352 to 2.290) | 1.560<br>(1.261 to 1.891) |
| Other cardiovascular and circulatory diseases | Male   | 2.176<br>(1.825 to 2.587) | 1.985<br>(1.700 to 2.313) | 1.811<br>(1.584 to 2.069) | 1.578<br>(1.425 to 1.749) |
| Other cardiovascular and circulatory diseases | Female | 2.144<br>(1.484 to 2.954) | 1.957<br>(1.416 to 2.601) | 1.787<br>(1.352 to 2.290) | 1.560<br>(1.261 to 1.891) |
| Asthma                                        | Male   | 2.098<br>(1.761 to 2.460) | 2.098<br>(1.761 to 2.460) | 2.098<br>(1.761 to 2.460) | 2.098<br>(1.761 to 2.460) |
| Asthma                                        | Female | 1.976<br>(1.788 to 2.181) | 1.976<br>(1.788 to 2.181) | 1.976<br>(1.788 to 2.181) | 1.976<br>(1.788 to 2.181) |
| Peptic ulcer disease                          | Both   | 2.040<br>(1.684 to 2.483) | 2.040<br>(1.684 to 2.483) | 2.040<br>(1.684 to 2.483) | 2.040<br>(1.684 to 2.483) |
| Diabetes mellitus                             | Male   | 1.426<br>(1.094 to 1.842) | 1.426<br>(1.094 to 1.842) | 1.426<br>(1.094 to 1.842) | 1.426<br>(1.094 to 1.842) |

|                                     | Sex    | 30-34 years                    | 35-39 years                    | 40-44 years                    | 45-49 years                    | 50-54 years                    | 55-59 years                    | 60-64 years                    |
|-------------------------------------|--------|--------------------------------|--------------------------------|--------------------------------|--------------------------------|--------------------------------|--------------------------------|--------------------------------|
| Diabetes mellitus                   | Female | 1·102<br>(0·953 to 1·275)      | 1·102<br>(0·953 to 1·275)      | 1·102<br>(0·953 to 1·275)      | 1·102<br>(0·953 to 1·275)      | 1·102<br>(0·953 to 1·275)      | 1·102<br>(0·953 to 1·275)      | 1·102<br>(0·953 to 1·275)      |
| Rheumatoid arthritis                | Both   | 1·375<br>(1·142 to 1·652)      | 1·375<br>(1·142 to 1·652)      | 1·375<br>(1·142 to 1·652)      | 1·375<br>(1·142 to 1·652)      | 1·375<br>(1·142 to 1·652)      | 1·375<br>(1·142 to 1·652)      | 1·375<br>(1·142 to 1·652)      |
| Cataract                            | Both   | 1·671<br>(1·479 to 1·875)      | 1·671<br>(1·479 to 1·875)      | 1·671<br>(1·479 to 1·875)      | 1·671<br>(1·479 to 1·875)      | 1·671<br>(1·479 to 1·875)      | 1·671<br>(1·479 to 1·875)      | 1·671<br>(1·479 to 1·875)      |
| Macular degeneration                | Both   | 1·911<br>(1·265 to 2·740)      | 1·911<br>(1·265 to 2·740)      | 1·911<br>(1·265 to 2·740)      | 1·911<br>(1·265 to 2·740)      | 1·911<br>(1·265 to 2·740)      | 1·911<br>(1·265 to 2·740)      | 1·911<br>(1·265 to 2·740)      |
| Lip and oral cavity cancer          | Male   | 8·162<br>(5·617 to 11·378)     | 8·162<br>(5·617 to 11·378)     | 8·162<br>(5·617 to 11·378)     | 8·162<br>(5·617 to 11·378)     | 8·162<br>(5·617 to 11·378)     | 8·162<br>(5·617 to 11·378)     | 8·162<br>(5·617 to 11·378)     |
| Lip and oral cavity cancer          | Female | 6·056<br>(4·232 to 8·541)      | 6·056<br>(4·232 to 8·541)      | 6·056<br>(4·232 to 8·541)      | 6·056<br>(4·232 to 8·541)      | 6·056<br>(4·232 to 8·541)      | 6·056<br>(4·232 to 8·541)      | 6·056<br>(4·232 to 8·541)      |
| Nasopharynx cancer                  | Male   | 8·227<br>(5·677 to 11·505)     | 8·227<br>(5·677 to 11·505)     | 8·227<br>(5·677 to 11·505)     | 8·227<br>(5·677 to 11·505)     | 8·227<br>(5·677 to 11·505)     | 8·227<br>(5·677 to 11·505)     | 8·227<br>(5·677 to 11·505)     |
| Nasopharynx cancer                  | Female | 6·089<br>(4·288 to 8·470)      | 6·089<br>(4·288 to 8·470)      | 6·089<br>(4·288 to 8·470)      | 6·089<br>(4·288 to 8·470)      | 6·089<br>(4·288 to 8·470)      | 6·089<br>(4·288 to 8·470)      | 6·089<br>(4·288 to 8·470)      |
| Oesophageal cancer                  | Male   | 6·676<br>(4·136 to 10·250)     | 6·676<br>(4·136 to 10·250)     | 6·676<br>(4·136 to 10·250)     | 6·676<br>(4·136 to 10·250)     | 6·676<br>(4·136 to 10·250)     | 6·676<br>(4·136 to 10·250)     | 6·676<br>(4·136 to 10·250)     |
| Oesophageal cancer                  | Female | 6·357<br>(4·442 to 8·634)      | 6·357<br>(4·442 to 8·634)      | 6·357<br>(4·442 to 8·634)      | 6·357<br>(4·442 to 8·634)      | 6·357<br>(4·442 to 8·634)      | 6·357<br>(4·442 to 8·634)      | 6·357<br>(4·442 to 8·634)      |
| Stomach cancer                      | Male   | 1·927<br>(1·443 to 2·535)      | 1·927<br>(1·443 to 2·535)      | 1·927<br>(1·443 to 2·535)      | 1·927<br>(1·443 to 2·535)      | 1·927<br>(1·443 to 2·535)      | 1·927<br>(1·443 to 2·535)      | 1·927<br>(1·443 to 2·535)      |
| Stomach cancer                      | Female | 1·570<br>(1·246 to 1·925)      | 1·570<br>(1·246 to 1·925)      | 1·570<br>(1·246 to 1·925)      | 1·570<br>(1·246 to 1·925)      | 1·570<br>(1·246 to 1·925)      | 1·570<br>(1·246 to 1·925)      | 1·570<br>(1·246 to 1·925)      |
| Colon and rectum cancer             | Male   | 1·325<br>(1·195 to 1·471)      | 1·325<br>(1·195 to 1·471)      | 1·325<br>(1·195 to 1·471)      | 1·325<br>(1·195 to 1·471)      | 1·325<br>(1·195 to 1·471)      | 1·325<br>(1·195 to 1·471)      | 1·325<br>(1·195 to 1·471)      |
| Colon and rectum cancer             | Female | 1·418<br>(1·278 to 1·571)      | 1·418<br>(1·278 to 1·571)      | 1·418<br>(1·278 to 1·571)      | 1·418<br>(1·278 to 1·571)      | 1·418<br>(1·278 to 1·571)      | 1·418<br>(1·278 to 1·571)      | 1·418<br>(1·278 to 1·571)      |
| Pancreatic cancer                   | Male   | 2·506<br>(1·962 to 3·111)      | 2·506<br>(1·962 to 3·111)      | 2·506<br>(1·962 to 3·111)      | 2·506<br>(1·962 to 3·111)      | 2·506<br>(1·962 to 3·111)      | 2·506<br>(1·962 to 3·111)      | 2·506<br>(1·962 to 3·111)      |
| Pancreatic cancer                   | Female | 2·098<br>(1·838 to 2·371)      | 2·098<br>(1·838 to 2·371)      | 2·098<br>(1·838 to 2·371)      | 2·098<br>(1·838 to 2·371)      | 2·098<br>(1·838 to 2·371)      | 2·098<br>(1·838 to 2·371)      | 2·098<br>(1·838 to 2·371)      |
| Larynx cancer                       | Male   | 14·602<br>(8·528 to 23·334)    | 14·602<br>(8·528 to 23·334)    | 14·602<br>(8·528 to 23·334)    | 14·602<br>(8·528 to 23·334)    | 14·602<br>(8·528 to 23·334)    | 14·602<br>(8·528 to 23·334)    | 14·602<br>(8·528 to 23·334)    |
| Larynx cancer                       | Female | 135·959<br>(23·287 to 465·991) | 135·959<br>(23·287 to 465·991) | 135·959<br>(23·287 to 465·991) | 135·959<br>(23·287 to 465·991) | 135·959<br>(23·287 to 465·991) | 135·959<br>(23·287 to 465·991) | 135·959<br>(23·287 to 465·991) |
| Tracheal, bronchus, and lung cancer | Male   | 22·511<br>(19·062 to 26·715)   | 22·511<br>(19·062 to 26·715)   | 22·511<br>(19·062 to 26·715)   | 22·511<br>(19·062 to 26·715)   | 22·511<br>(19·062 to 26·715)   | 22·511<br>(19·062 to 26·715)   | 22·511<br>(19·062 to 26·715)   |
| Tracheal, bronchus, and lung cancer | Female | 14·095<br>(13·045 to 15·359)   | 14·095<br>(13·045 to 15·359)   | 14·095<br>(13·045 to 15·359)   | 14·095<br>(13·045 to 15·359)   | 14·095<br>(13·045 to 15·359)   | 14·095<br>(13·045 to 15·359)   | 14·095<br>(13·045 to 15·359)   |
| Cervical cancer                     | Female | 1·679<br>(1·207 to 2·240)      | 1·679<br>(1·207 to 2·240)      | 1·679<br>(1·207 to 2·240)      | 1·679<br>(1·207 to 2·240)      | 1·679<br>(1·207 to 2·240)      | 1·679<br>(1·207 to 2·240)      | 1·679<br>(1·207 to 2·240)      |
| Kidney cancer                       | Male   | 2·293<br>(1·677 to 3·039)      | 2·293<br>(1·677 to 3·039)      | 2·293<br>(1·677 to 3·039)      | 2·293<br>(1·677 to 3·039)      | 2·293<br>(1·677 to 3·039)      | 2·293<br>(1·677 to 3·039)      | 2·293<br>(1·677 to 3·039)      |

|                                     | Sex    | 65-69 years                    | 70-74 years                    | 75-79 years                    | 80+ years                      |
|-------------------------------------|--------|--------------------------------|--------------------------------|--------------------------------|--------------------------------|
| Diabetes mellitus                   | Female | 1.102<br>(0.953 to 1.275)      | 1.102<br>(0.953 to 1.275)      | 1.102<br>(0.953 to 1.275)      | 1.102<br>(0.953 to 1.275)      |
| Rheumatoid arthritis                | Both   | 1.375<br>(1.142 to 1.652)      | 1.375<br>(1.142 to 1.652)      | 1.375<br>(1.142 to 1.652)      | 1.375<br>(1.142 to 1.652)      |
| Cataract                            | Both   | 1.671<br>(1.479 to 1.875)      | 1.671<br>(1.479 to 1.875)      | 1.671<br>(1.479 to 1.875)      | 1.671<br>(1.479 to 1.875)      |
| Macular degeneration                | Both   | 1.911<br>(1.265 to 2.740)      | 1.911<br>(1.265 to 2.740)      | 1.911<br>(1.265 to 2.740)      | 1.911<br>(1.265 to 2.740)      |
| Lip and oral cavity cancer          | Male   | 8.162<br>(5.617 to 11.378)     | 8.162<br>(5.617 to 11.378)     | 8.162<br>(5.617 to 11.378)     | 8.162<br>(5.617 to 11.378)     |
| Lip and oral cavity cancer          | Female | 6.056<br>(4.232 to 8.541)      | 6.056<br>(4.232 to 8.541)      | 6.056<br>(4.232 to 8.541)      | 6.056<br>(4.232 to 8.541)      |
| Nasopharynx cancer                  | Male   | 8.227<br>(5.677 to 11.505)     | 8.227<br>(5.677 to 11.505)     | 8.227<br>(5.677 to 11.505)     | 8.227<br>(5.677 to 11.505)     |
| Nasopharynx cancer                  | Female | 6.089<br>(4.288 to 8.470)      | 6.089<br>(4.288 to 8.470)      | 6.089<br>(4.288 to 8.470)      | 6.089<br>(4.288 to 8.470)      |
| Oesophageal cancer                  | Male   | 6.676<br>(4.136 to 10.250)     | 6.676<br>(4.136 to 10.250)     | 6.676<br>(4.136 to 10.250)     | 6.676<br>(4.136 to 10.250)     |
| Oesophageal cancer                  | Female | 6.357<br>(4.442 to 8.634)      | 6.357<br>(4.442 to 8.634)      | 6.357<br>(4.442 to 8.634)      | 6.357<br>(4.442 to 8.634)      |
| Stomach cancer                      | Male   | 1.927<br>(1.443 to 2.535)      | 1.927<br>(1.443 to 2.535)      | 1.927<br>(1.443 to 2.535)      | 1.927<br>(1.443 to 2.535)      |
| Stomach cancer                      | Female | 1.570<br>(1.246 to 1.925)      | 1.570<br>(1.246 to 1.925)      | 1.570<br>(1.246 to 1.925)      | 1.570<br>(1.246 to 1.925)      |
| Colon and rectum cancer             | Male   | 1.325<br>(1.195 to 1.471)      | 1.325<br>(1.195 to 1.471)      | 1.325<br>(1.195 to 1.471)      | 1.325<br>(1.195 to 1.471)      |
| Colon and rectum cancer             | Female | 1.418<br>(1.278 to 1.571)      | 1.418<br>(1.278 to 1.571)      | 1.418<br>(1.278 to 1.571)      | 1.418<br>(1.278 to 1.571)      |
| Pancreatic cancer                   | Male   | 2.506<br>(1.962 to 3.111)      | 2.506<br>(1.962 to 3.111)      | 2.506<br>(1.962 to 3.111)      | 2.506<br>(1.962 to 3.111)      |
| Pancreatic cancer                   | Female | 2.098<br>(1.838 to 2.371)      | 2.098<br>(1.838 to 2.371)      | 2.098<br>(1.838 to 2.371)      | 2.098<br>(1.838 to 2.371)      |
| Larynx cancer                       | Male   | 14.602<br>(8.528 to 23.334)    | 14.602<br>(8.528 to 23.334)    | 14.602<br>(8.528 to 23.334)    | 14.602<br>(8.528 to 23.334)    |
| Larynx cancer                       | Female | 135.959<br>(23.287 to 465.991) | 135.959<br>(23.287 to 465.991) | 135.959<br>(23.287 to 465.991) | 135.959<br>(23.287 to 465.991) |
| Tracheal, bronchus, and lung cancer | Male   | 22.511<br>(19.062 to 26.715)   | 22.511<br>(19.062 to 26.715)   | 22.511<br>(19.062 to 26.715)   | 22.511<br>(19.062 to 26.715)   |
| Tracheal, bronchus, and lung cancer | Female | 14.095<br>(13.045 to 15.359)   | 14.095<br>(13.045 to 15.359)   | 14.095<br>(13.045 to 15.359)   | 14.095<br>(13.045 to 15.359)   |
| Cervical cancer                     | Female | 1.679<br>(1.207 to 2.240)      | 1.679<br>(1.207 to 2.240)      | 1.679<br>(1.207 to 2.240)      | 1.679<br>(1.207 to 2.240)      |
| Kidney cancer                       | Male   | 2.293<br>(1.677 to 3.039)      | 2.293<br>(1.677 to 3.039)      | 2.293<br>(1.677 to 3.039)      | 2.293<br>(1.677 to 3.039)      |

|                                                     | Sex    | 30-34 years                  | 35-39 years                  | 40-44 years                  | 45-49 years                  | 50-54 years                  | 55-59 years                  | 60-64 years                  |
|-----------------------------------------------------|--------|------------------------------|------------------------------|------------------------------|------------------------------|------------------------------|------------------------------|------------------------------|
| Kidney cancer                                       | Female | 1.518<br>(1.204 to 1.874)    | 1.518<br>(1.204 to 1.874)    | 1.518<br>(1.204 to 1.874)    | 1.518<br>(1.204 to 1.874)    | 1.518<br>(1.204 to 1.874)    | 1.518<br>(1.204 to 1.874)    | 1.518<br>(1.204 to 1.874)    |
| Bladder cancer                                      | Male   | 3.332<br>(2.364 to 4.558)    | 3.332<br>(2.364 to 4.558)    | 3.332<br>(2.364 to 4.558)    | 3.332<br>(2.364 to 4.558)    | 3.332<br>(2.364 to 4.558)    | 3.332<br>(2.364 to 4.558)    | 3.332<br>(2.364 to 4.558)    |
| Bladder cancer                                      | Female | 2.582<br>(1.923 to 3.420)    | 2.582<br>(1.923 to 3.420)    | 2.582<br>(1.923 to 3.420)    | 2.582<br>(1.923 to 3.420)    | 2.582<br>(1.923 to 3.420)    | 2.582<br>(1.923 to 3.420)    | 2.582<br>(1.923 to 3.420)    |
| Leukaemia                                           | Male   | 2.013<br>(1.390 to 2.873)    | 2.013<br>(1.390 to 2.873)    | 2.013<br>(1.390 to 2.873)    | 2.013<br>(1.390 to 2.873)    | 2.013<br>(1.390 to 2.873)    | 2.013<br>(1.390 to 2.873)    | 2.013<br>(1.390 to 2.873)    |
| Leukaemia                                           | Female | 1.163<br>(0.894 to 1.479)    | 1.163<br>(0.894 to 1.479)    | 1.163<br>(0.894 to 1.479)    | 1.163<br>(0.894 to 1.479)    | 1.163<br>(0.894 to 1.479)    | 1.163<br>(0.894 to 1.479)    | 1.163<br>(0.894 to 1.479)    |
| Chronic obstructive pulmonary disease               | Male   | 11.546<br>(8.894 to 14.932)  | 11.546<br>(8.894 to 14.932)  | 11.546<br>(8.894 to 14.932)  | 11.546<br>(8.894 to 14.932)  | 11.546<br>(8.894 to 14.932)  | 11.546<br>(8.894 to 14.932)  | 11.546<br>(8.894 to 14.932)  |
| Chronic obstructive pulmonary disease               | Female | 15.257<br>(13.637 to 17.152) | 15.257<br>(13.637 to 17.152) | 15.257<br>(13.637 to 17.152) | 15.257<br>(13.637 to 17.152) | 15.257<br>(13.637 to 17.152) | 15.257<br>(13.637 to 17.152) | 15.257<br>(13.637 to 17.152) |
| Interstitial lung disease and pulmonary sarcoidosis | Male   | 2.086<br>(1.774 to 2.441)    | 2.086<br>(1.774 to 2.441)    | 2.086<br>(1.774 to 2.441)    | 2.086<br>(1.774 to 2.441)    | 2.086<br>(1.774 to 2.441)    | 2.086<br>(1.774 to 2.441)    | 2.086<br>(1.774 to 2.441)    |
| Interstitial lung disease and pulmonary sarcoidosis | Female | 1.967<br>(1.768 to 2.176)    | 1.967<br>(1.768 to 2.176)    | 1.967<br>(1.768 to 2.176)    | 1.967<br>(1.768 to 2.176)    | 1.967<br>(1.768 to 2.176)    | 1.967<br>(1.768 to 2.176)    | 1.967<br>(1.768 to 2.176)    |
| Other chronic respiratory diseases                  | Male   | 2.100<br>(1.774 to 2.462)    | 2.100<br>(1.774 to 2.462)    | 2.100<br>(1.774 to 2.462)    | 2.100<br>(1.774 to 2.462)    | 2.100<br>(1.774 to 2.462)    | 2.100<br>(1.774 to 2.462)    | 2.100<br>(1.774 to 2.462)    |
| Other chronic respiratory diseases                  | Female | 1.982<br>(1.800 to 2.172)    | 1.982<br>(1.800 to 2.172)    | 1.982<br>(1.800 to 2.172)    | 1.982<br>(1.800 to 2.172)    | 1.982<br>(1.800 to 2.172)    | 1.982<br>(1.800 to 2.172)    | 1.982<br>(1.800 to 2.172)    |
| Hip Fracture                                        | Both   | 1.850<br>(1.518 to 2.250)    | 1.850<br>(1.518 to 2.250)    | 1.850<br>(1.518 to 2.250)    | 1.850<br>(1.518 to 2.250)    | 1.850<br>(1.518 to 2.250)    | 1.850<br>(1.518 to 2.250)    | 1.850<br>(1.518 to 2.250)    |
| Non-Hip Fracture                                    | Both   | 1.250<br>(1.153 to 1.359)    | 1.250<br>(1.153 to 1.359)    | 1.250<br>(1.153 to 1.359)    | 1.250<br>(1.153 to 1.359)    | 1.250<br>(1.153 to 1.359)    | 1.250<br>(1.153 to 1.359)    | 1.250<br>(1.153 to 1.359)    |

|                                                     | Sex    | 65-69 years                  | 70-74 years                  | 75-79 years                  | 80+ years                    |
|-----------------------------------------------------|--------|------------------------------|------------------------------|------------------------------|------------------------------|
| Kidney cancer                                       | Female | 1.518<br>(1.204 to 1.874)    | 1.518<br>(1.204 to 1.874)    | 1.518<br>(1.204 to 1.874)    | 1.518<br>(1.204 to 1.874)    |
| Bladder cancer                                      | Male   | 3.332<br>(2.364 to 4.558)    | 3.332<br>(2.364 to 4.558)    | 3.332<br>(2.364 to 4.558)    | 3.332<br>(2.364 to 4.558)    |
| Bladder cancer                                      | Female | 2.582<br>(1.923 to 3.420)    | 2.582<br>(1.923 to 3.420)    | 2.582<br>(1.923 to 3.420)    | 2.582<br>(1.923 to 3.420)    |
| Leukaemia                                           | Male   | 2.013<br>(1.390 to 2.873)    | 2.013<br>(1.390 to 2.873)    | 2.013<br>(1.390 to 2.873)    | 2.013<br>(1.390 to 2.873)    |
| Leukaemia                                           | Female | 1.163<br>(0.894 to 1.479)    | 1.163<br>(0.894 to 1.479)    | 1.163<br>(0.894 to 1.479)    | 1.163<br>(0.894 to 1.479)    |
| Chronic obstructive pulmonary disease               | Male   | 11.546<br>(8.894 to 14.932)  | 11.546<br>(8.894 to 14.932)  | 11.546<br>(8.894 to 14.932)  | 11.546<br>(8.894 to 14.932)  |
| Chronic obstructive pulmonary disease               | Female | 15.257<br>(13.637 to 17.152) | 15.257<br>(13.637 to 17.152) | 15.257<br>(13.637 to 17.152) | 15.257<br>(13.637 to 17.152) |
| Interstitial lung disease and pulmonary sarcoidosis | Male   | 2.086<br>(1.774 to 2.441)    | 2.086<br>(1.774 to 2.441)    | 2.086<br>(1.774 to 2.441)    | 2.086<br>(1.774 to 2.441)    |
| Interstitial lung disease and pulmonary sarcoidosis | Female | 1.967<br>(1.768 to 2.176)    | 1.967<br>(1.768 to 2.176)    | 1.967<br>(1.768 to 2.176)    | 1.967<br>(1.768 to 2.176)    |
| Other chronic respiratory diseases                  | Male   | 2.100<br>(1.774 to 2.462)    | 2.100<br>(1.774 to 2.462)    | 2.100<br>(1.774 to 2.462)    | 2.100<br>(1.774 to 2.462)    |
| Other chronic respiratory diseases                  | Female | 1.982<br>(1.800 to 2.172)    | 1.982<br>(1.800 to 2.172)    | 1.982<br>(1.800 to 2.172)    | 1.982<br>(1.800 to 2.172)    |
| Hip Fracture                                        | Both   | 1.850<br>(1.518 to 2.250)    | 1.850<br>(1.518 to 2.250)    | 1.850<br>(1.518 to 2.250)    | 1.850<br>(1.518 to 2.250)    |
| Non-Hip Fracture                                    | Both   | 1.250<br>(1.153 to 1.359)    | 1.250<br>(1.153 to 1.359)    | 1.250<br>(1.153 to 1.359)    | 1.250<br>(1.153 to 1.359)    |



Table S8

| Country or Territory   | Male Smoking Attributable DALYs 2015 (95% UI) | Male Smoking Attributable Deaths 2015 (95% UI) | Male Smoking Attributable DALY Rate 2015, per 100 (95% UI) | Male Smoking Attributable Death Rate 2015, per 100 (95% UI) | Female Smoking Attributable DALYs 2015 (95% UI) | Female Smoking Attributable Deaths 2015 (95% UI) | Female Smoking Attributable DALY Rate 2015, per 100 (95% UI) | Female Smoking Attributable Death Rate 2015, per 100 (95% UI) |
|------------------------|-----------------------------------------------|------------------------------------------------|------------------------------------------------------------|-------------------------------------------------------------|-------------------------------------------------|--------------------------------------------------|--------------------------------------------------------------|---------------------------------------------------------------|
| Global                 | 120092504.0<br>(107836744.0 - 132522080.0)    | 4959156.0<br>(4451601.0 - 5465780.5)           | 36.7<br>(33 - 40.5)                                        | 1.7<br>(1.5 - 1.9)                                          | 28530670<br>(24894928 - 32916060)               | 1443038.4<br>(1239590.9 - 1664258.4)             | 8<br>(7 - 9.3)                                               | 0.4<br>(0.4 - 0.5)                                            |
| Afghanistan            | 487982.9<br>(313737.8 - 694353.3)             | 15301.9<br>(9700.5 - 21600.1)                  | 68.5<br>(44.1 - 95.2)                                      | 2.6<br>(1.7 - 3.6)                                          | 337174.4<br>(188783.6 - 534311.1)               | 10163.6<br>(5703.2 - 15892.3)                    | 45.1<br>(25.4 - 70)                                          | 1.6<br>(0.9 - 2.4)                                            |
| Albania                | 65824.5<br>(55668.7 - 76563.3)                | 2993.6<br>(2466.4 - 3555.8)                    | 38.3<br>(32.6 - 44.4)                                      | 1.8<br>(1.5 - 2.1)                                          | 9040.6<br>(7379.6 - 10844)                      | 469.4<br>(364.2 - 598.2)                         | 4.9<br>(4 - 5.9)                                             | 0.2<br>(0.2 - 0.3)                                            |
| Algeria                | 240717.8<br>(188012 - 299717)                 | 8455.7<br>(6424.4 - 10633.1)                   | 15.8<br>(12.4 - 19.6)                                      | 0.6<br>(0.5 - 0.8)                                          | 34093.8<br>(21164.5 - 50070.7)                  | 1294.7<br>(786.3 - 2026.9)                       | 2.2<br>(1.4 - 3.3)                                           | 0.1<br>(0.1 - 0.2)                                            |
| American Samoa         | 1085.1<br>(799.6 - 1409.3)                    | 31.2<br>(23.1 - 40.3)                          | 44.7<br>(34 - 56.2)                                        | 1.8<br>(1.4 - 2.2)                                          | 494.8<br>(353.9 - 673)                          | 15.1<br>(10.8 - 20.9)                            | 17.9<br>(13.1 - 23.8)                                        | 0.7<br>(0.5 - 1)                                              |
| Andorra                | 1125.4<br>(969.2 - 1278.9)                    | 67<br>(57.7 - 76.7)                            | 18.2<br>(15.6 - 20.8)                                      | 1<br>(0.8 - 1.1)                                            | 269<br>(190.9 - 343.5)                          | 19.5<br>(12.9 - 26.7)                            | 3.7<br>(2.6 - 4.7)                                           | 0.2<br>(0.1 - 0.2)                                            |
| Angola                 | 177659.7<br>(57776 - 596549.1)                | 5577.6<br>(1770.1 - 18235.6)                   | 36.3<br>(12.4 - 114.8)                                     | 1.4<br>(0.5 - 4.2)                                          | 68215.8<br>(5623.2 - 270962.5)                  | 2302.8<br>(184.5 - 8410.9)                       | 13.2<br>(1.1 - 47.6)                                         | 0.5<br>(0 - 1.8)                                              |
| Antigua and Barbuda    | 337<br>(243.5 - 424.6)                        | 12.7<br>(8.7 - 16.1)                           | 8.4<br>(6 - 10.6)                                          | 0.4<br>(0.2 - 0.5)                                          | 89.9<br>(57.9 - 124.8)                          | 3.8<br>(2.4 - 5.5)                               | 1.9<br>(1.2 - 2.6)                                           | 0.1<br>(0.1 - 0.1)                                            |
| Argentina              | 678571.6<br>(624431.9 - 738296.4)             | 30754<br>(28263.4 - 33659.5)                   | 34<br>(31.3 - 37.1)                                        | 1.6<br>(1.5 - 1.8)                                          | 283905.3<br>(255063.9 - 314399.2)               | 14722.9<br>(12599.6 - 16974.8)                   | 11.5<br>(10.3 - 12.7)                                        | 0.5<br>(0.5 - 0.6)                                            |
| Armenia                | 102410.5<br>(91469.7 - 113149.8)              | 4314.9<br>(3817.2 - 4809.1)                    | 66.8<br>(59.7 - 73.9)                                      | 2.9<br>(2.6 - 3.3)                                          | 10444.2<br>(8281.5 - 12528.6)                   | 472.3<br>(323.5 - 618.1)                         | 5.1<br>(4 - 6)                                               | 0.2<br>(0.2 - 0.3)                                            |
| Australia              | 242428.1<br>(223159.9 - 262672.4)             | 13697.3<br>(12595.3 - 14865.7)                 | 15.7<br>(14.4 - 17)                                        | 0.9<br>(0.8 - 0.9)                                          | 140109.2<br>(128896 - 151736.5)                 | 8544.6<br>(7732.6 - 9421)                        | 8.3<br>(7.6 - 9)                                             | 0.4<br>(0.4 - 0.5)                                            |
| Austria                | 141686.6<br>(130047.4 - 152745.6)             | 6724.5<br>(6152.4 - 7268.7)                    | 22.2<br>(20.3 - 24)                                        | 1<br>(0.9 - 1.1)                                            | 64126.5<br>(58815.6 - 70175.6)                  | 3523.7<br>(3062.1 - 4027.1)                      | 8.7<br>(8 - 9.5)                                             | 0.4<br>(0.3 - 0.4)                                            |
| Azerbaijan             | 240046.2<br>(205857.1 - 276125.2)             | 8132.5<br>(6877.4 - 9511.8)                    | 54.9<br>(46.6 - 63.7)                                      | 2.2<br>(1.8 - 2.6)                                          | 17088.6<br>(11893.4 - 22370)                    | 542.6<br>(377 - 728.2)                           | 3.4<br>(2.4 - 4.4)                                           | 0.1<br>(0.1 - 0.2)                                            |
| Bahrain                | 5978.6<br>(4101 - 8313.5)                     | 169.6<br>(115.7 - 234.5)                       | 12.4<br>(8.7 - 16.7)                                       | 0.6<br>(0.4 - 0.8)                                          | 1844.2<br>(1222.1 - 2634)                       | 56.9<br>(36.2 - 82.3)                            | 5.7<br>(3.7 - 8.1)                                           | 0.3<br>(0.2 - 0.4)                                            |
| Bangladesh             | 3281736.8<br>(2657121 - 4073151.3)            | 132537.2<br>(109776.3 - 161398.8)              | 61.3<br>(50.3 - 75.2)                                      | 2.9<br>(2.4 - 3.5)                                          | 521260.5<br>(340818.2 - 772432.9)               | 20108.2<br>(12601.8 - 30675.9)                   | 10.2<br>(6.5 - 15.4)                                         | 0.4<br>(0.3 - 0.7)                                            |
| Barbados               | 1762.8<br>(1398.8 - 2172.2)                   | 78.4<br>(59.2 - 103)                           | 10.3<br>(8.2 - 12.8)                                       | 0.5<br>(0.3 - 0.6)                                          | 413.6<br>(272.9 - 577.5)                        | 18.5<br>(11 - 28.2)                              | 2<br>(1.4 - 2.8)                                             | 0.1<br>(0.1 - 0.1)                                            |
| Belarus                | 517728.8<br>(462445.6 - 573529.1)             | 20478.3<br>(18286.4 - 22855.9)                 | 93<br>(83.3 - 103)                                         | 3.9<br>(3.5 - 4.3)                                          | 48851.8<br>(39116.2 - 59507)                    | 1788.8<br>(1385.2 - 2299.5)                      | 6.6<br>(5.4 - 7.9)                                           | 0.2<br>(0.2 - 0.3)                                            |
| Belgium                | 255211<br>(234769.7 - 277281.3)               | 13875.4<br>(12655 - 15105.9)                   | 30.8<br>(28.3 - 33.5)                                      | 1.6<br>(1.4 - 1.7)                                          | 93450.4<br>(83232.5 - 103689.6)                 | 5312.1<br>(4485.7 - 6147.5)                      | 10.1<br>(9.1 - 11.2)                                         | 0.5<br>(0.4 - 0.5)                                            |
| Belize                 | 2855.7<br>(2259.8 - 3468.2)                   | 103.1<br>(83.1 - 125.2)                        | 27.1<br>(21.8 - 33.2)                                      | 1.2<br>(1 - 1.4)                                            | 648.3<br>(479.3 - 823.1)                        | 23.5<br>(17.5 - 30)                              | 6.1<br>(4.6 - 7.7)                                           | 0.3<br>(0.2 - 0.4)                                            |
| Benin                  | 69981.4<br>(22107.5 - 169330.8)               | 2209.6<br>(683.3 - 5189.9)                     | 27.7<br>(9.3 - 63.1)                                       | 1.1<br>(0.4 - 2.3)                                          | 13920.6<br>(2424.8 - 44668.4)                   | 545<br>(86 - 1689.9)                             | 5.7<br>(1 - 17.3)                                            | 0.3<br>(0 - 0.8)                                              |
| Bermuda                | 806.6<br>(683 - 941.6)                        | 35.1<br>(30.3 - 40.4)                          | 25.5<br>(21.6 - 29.7)                                      | 1.2<br>(1 - 1.4)                                            | 185<br>(135 - 238.1)                            | 11<br>(8.1 - 14.2)                               | 5.3<br>(3.9 - 6.8)                                           | 0.3<br>(0.2 - 0.4)                                            |
| Bhutan                 | 3187.5<br>(1803.7 - 5141.1)                   | 114.9<br>(55.1 - 197.9)                        | 10.4<br>(5.5 - 17.2)                                       | 0.5<br>(0.2 - 0.8)                                          | 860.7<br>(436.2 - 1820)                         | 27.9<br>(13.4 - 62.5)                            | 3.5<br>(1.7 - 7.7)                                           | 0.1<br>(0.1 - 0.3)                                            |
| Bolivia                | 80367.9<br>(59954.3 - 109563.7)               | 3486.4<br>(2583.9 - 4673.6)                    | 21.8<br>(16.3 - 29.8)                                      | 1<br>(0.8 - 1.4)                                            | 35342<br>(23350.8 - 48909.3)                    | 1738.4<br>(1086 - 2466.7)                        | 9<br>(5.9 - 12.5)                                            | 0.4<br>(0.3 - 0.6)                                            |
| Bosnia and Herzegovina | 105945.9<br>(97204.8 - 115295.1)              | 4435.8<br>(4038.1 - 4832.3)                    | 39.4<br>(36.2 - 42.8)                                      | 1.7<br>(1.6 - 1.9)                                          | 29335.9<br>(25011 - 33897.1)                    | 1338.7<br>(1068.4 - 1630.8)                      | 9.9<br>(8.5 - 11.4)                                          | 0.4<br>(0.3 - 0.5)                                            |
| Botswana               | 41420.6<br>(11998.2 - 136380)                 | 1318<br>(374.6 - 4201.5)                       | 63.4<br>(19.6 - 195.4)                                     | 2.5<br>(0.8 - 7.1)                                          | 13112<br>(2541.4 - 61345.9)                     | 471.2<br>(90.9 - 2085.8)                         | 19.6<br>(4.1 - 85.5)                                         | 0.8<br>(0.2 - 3.3)                                            |
| Brazil                 | 2209194<br>(1979124.1 - 2462033.8)            | 94203.9<br>(84767.9 - 104092.2)                | 25.4<br>(22.8 - 28.2)                                      | 1.3<br>(1.1 - 1.4)                                          | 1223426.3<br>(1095315.1 - 1344622.6)            | 55069.5<br>(49694.4 - 61074.3)                   | 11.6<br>(10.4 - 12.8)                                        | 0.6<br>(0.5 - 0.6)                                            |

| Country or Territory             | Male Smoking Attributable DALYs 2015 (95% UI) | Male Smoking Attributable Deaths 2015 (95% UI) | Male Smoking Attributable DALY Rate 2015, per 100 (95% UI) | Male Smoking Attributable Death Rate 2015, per 100 (95% UI) | Female Smoking Attributable DALYs 2015 (95% UI) | Female Smoking Attributable Deaths 2015 (95% UI) | Female Smoking Attributable DALY Rate 2015, per 100 (95% UI) | Female Smoking Attributable Death Rate 2015, per 100 (95% UI) |
|----------------------------------|-----------------------------------------------|------------------------------------------------|------------------------------------------------------------|-------------------------------------------------------------|-------------------------------------------------|--------------------------------------------------|--------------------------------------------------------------|---------------------------------------------------------------|
| Brunei                           | 3647.9<br>(3065.2 - 4241.5)                   | 135.7<br>(115.9 - 155)                         | 24.2<br>(20.6 - 27.7)                                      | 1.2<br>(1.1 - 1.4)                                          | 1370<br>(1133.3 - 1626.9)                       | 58.3<br>(49.5 - 67.9)                            | 9.4<br>(8 - 10.9)                                            | 0.5<br>(0.4 - 0.6)                                            |
| Bulgaria                         | 312077.5<br>(283998.7 - 340487.4)             | 12537.5<br>(11305.1 - 13753.4)                 | 58.2<br>(53 - 63.4)                                        | 2.3<br>(2 - 2.5)                                            | 83973<br>(73096 - 95901.1)                      | 3385.8<br>(2810 - 4138.7)                        | 13.9<br>(12.2 - 15.7)                                        | 0.5<br>(0.4 - 0.6)                                            |
| Burkina Faso                     | 65753.4<br>(28576.6 - 149576.3)               | 1826.5<br>(735.2 - 4352.4)                     | 17.4<br>(7.4 - 40.1)                                       | 0.6<br>(0.3 - 1.4)                                          | 31004.9<br>(11255 - 79484.1)                    | 1023.5<br>(348.7 - 2651)                         | 7.6<br>(2.8 - 18.8)                                          | 0.3<br>(0.1 - 0.7)                                            |
| Burundi                          | 46498.7<br>(18443.9 - 98777.2)                | 1433.6<br>(543.1 - 3067.7)                     | 18.6<br>(7.5 - 38.9)                                       | 0.7<br>(0.3 - 1.4)                                          | 6576.4<br>(2500.7 - 18176.3)                    | 225.5<br>(85.6 - 618.6)                          | 2.7<br>(1.1 - 7.4)                                           | 0.1<br>(0 - 0.3)                                              |
| Cambodia                         | 266780.3<br>(218725.8 - 328882.8)             | 9903.8<br>(8107.5 - 12088.1)                   | 67.9<br>(56.3 - 82.1)                                      | 3.2<br>(2.7 - 3.9)                                          | 65672.2<br>(44356 - 90317.7)                    | 2509.7<br>(1659.7 - 3473)                        | 12.7<br>(8.5 - 17.2)                                         | 0.6<br>(0.4 - 0.8)                                            |
| Cameroon                         | 138878.4<br>(50723.7 - 330925.4)              | 4587.7<br>(1683.8 - 10775.9)                   | 26.2<br>(9.9 - 60.8)                                       | 1<br>(0.4 - 2.3)                                            | 33118.3<br>(6607.4 - 99635.2)                   | 1320.8<br>(244 - 3838.8)                         | 6.5<br>(1.3 - 18.9)                                          | 0.3<br>(0.1 - 0.8)                                            |
| Canada                           | 485976.2<br>(446893 - 529046.3)               | 26318.6<br>(24131.9 - 28762.8)                 | 19.3<br>(17.8 - 20.9)                                      | 1<br>(1 - 1.1)                                              | 331334<br>(305981.3 - 356321.3)                 | 19338.4<br>(17528.8 - 21284.9)                   | 11.9<br>(11 - 12.8)                                          | 0.6<br>(0.6 - 0.7)                                            |
| Cape Verde                       | 2922.8<br>(1989.6 - 4218.3)                   | 117.7<br>(80.6 - 169.5)                        | 21.7<br>(15 - 30.5)                                        | 1<br>(0.7 - 1.4)                                            | 977.5<br>(679.7 - 1543.6)                       | 44.1<br>(28.9 - 70.8)                            | 5.7<br>(4 - 9)                                               | 0.3<br>(0.2 - 0.4)                                            |
| Central African Republic         | 69972.8<br>(14478.7 - 149232.9)               | 2254.5<br>(446.6 - 4656.9)                     | 55<br>(11.7 - 114.7)                                       | 2<br>(0.4 - 4)                                              | 16409.4<br>(1441.4 - 49385.1)                   | 601.8<br>(50.6 - 1753)                           | 12.3<br>(1.1 - 36.2)                                         | 0.5<br>(0 - 1.4)                                              |
| Chad                             | 63216.5<br>(22183.5 - 157364.6)               | 2082<br>(717.3 - 5103.9)                       | 24.1<br>(8.9 - 58)                                         | 1<br>(0.4 - 2.3)                                            | 15864.6<br>(3199.9 - 51759.5)                   | 610.6<br>(113.2 - 1969.5)                        | 6.1<br>(1.3 - 19.3)                                          | 0.3<br>(0.1 - 0.9)                                            |
| Chile                            | 157874.3<br>(136470.6 - 177660.7)             | 7730.7<br>(6663.9 - 8837.7)                    | 17.2<br>(14.9 - 19.4)                                      | 0.9<br>(0.8 - 1)                                            | 96234.7<br>(83977.9 - 109756.1)                 | 5622.4<br>(4789.9 - 6558.7)                      | 8.5<br>(7.4 - 9.8)                                           | 0.5<br>(0.4 - 0.5)                                            |
| China                            | 32149490.0<br>(24106296.0 - 40881364.0)       | 1448653.4<br>(1069346.4 - 1825899.1)           | 42.1<br>(31.5 - 53.2)                                      | 2.2<br>(1.6 - 2.8)                                          | 4761507<br>(2007050.4 - 8643378)                | 318708.3<br>(131386.6 - 533137)                  | 6.6<br>(2.8 - 11.7)                                          | 0.5<br>(0.2 - 0.8)                                            |
| Colombia                         | 251820.9<br>(217019.3 - 289722.4)             | 11616.8<br>(10024.1 - 13279.1)                 | 13.7<br>(11.9 - 15.6)                                      | 0.8<br>(0.7 - 0.9)                                          | 131596.5<br>(112302.4 - 154029.2)               | 7634.6<br>(6421.8 - 8983.4)                      | 6.2<br>(5.3 - 7.2)                                           | 0.4<br>(0.3 - 0.5)                                            |
| Comoros                          | 3480.8<br>(1543.3 - 7110)                     | 102<br>(43 - 217.1)                            | 17.1<br>(7.6 - 34.7)                                       | 0.6<br>(0.3 - 1.3)                                          | 393.1<br>(158.3 - 1006.1)                       | 12.2<br>(4.7 - 30.8)                             | 1.9<br>(0.8 - 4.7)                                           | 0.1<br>(0 - 0.2)                                              |
| Congo                            | 25432.6<br>(12304.7 - 57030.7)                | 895.6<br>(427.6 - 1989.7)                      | 22.7<br>(11.1 - 50.1)                                      | 1<br>(0.5 - 2.1)                                            | 16001.3<br>(3120.2 - 39200.8)                   | 582.4<br>(102.6 - 1369.7)                        | 13.6<br>(2.7 - 32)                                           | 0.5<br>(0.1 - 1.3)                                            |
| Costa Rica                       | 18570.7<br>(15215.4 - 21950.4)                | 925.9<br>(761.6 - 1097.3)                      | 8.4<br>(6.9 - 9.9)                                         | 0.5<br>(0.4 - 0.6)                                          | 5755.9<br>(3850.7 - 7433)                       | 361.3<br>(186.5 - 508.1)                         | 2.4<br>(1.6 - 3.1)                                           | 0.2<br>(0.1 - 0.2)                                            |
| Cote d'Ivoire                    | 169926.8<br>(63874.8 - 363865.1)              | 5113<br>(1787.9 - 11048.4)                     | 26.4<br>(9.9 - 55.6)                                       | 0.9<br>(0.3 - 1.9)                                          | 25381.4<br>(7081.1 - 63527.9)                   | 1099.4<br>(309.5 - 2688.5)                       | 6.3<br>(1.9 - 15.1)                                          | 0.3<br>(0.1 - 0.8)                                            |
| Croatia                          | 125684<br>(115378.8 - 136444.7)               | 5710.5<br>(5242.9 - 6245.7)                    | 40.9<br>(37.5 - 44.4)                                      | 1.8<br>(1.7 - 2)                                            | 44176.6<br>(38753.1 - 50674)                    | 2309.3<br>(1910.1 - 2773.3)                      | 11.7<br>(10.4 - 13.2)                                        | 0.5<br>(0.4 - 0.6)                                            |
| Cuba                             | 252682.4<br>(227339.9 - 278654.2)             | 12584.3<br>(11243 - 14158.1)                   | 33.2<br>(29.8 - 36.5)                                      | 1.7<br>(1.5 - 1.9)                                          | 119395.3<br>(104816.7 - 136218.1)               | 6733.3<br>(5668.7 - 8131.9)                      | 14.5<br>(12.8 - 16.6)                                        | 0.8<br>(0.6 - 0.9)                                            |
| Cyprus                           | 13735.2<br>(12379.5 - 15181.6)                | 636.2<br>(572.1 - 705.7)                       | 25.2<br>(22.7 - 27.9)                                      | 1.1<br>(1 - 1.3)                                            | 2251.6<br>(1875.9 - 2641.7)                     | 80.7<br>(63.1 - 100.7)                           | 3.8<br>(3.2 - 4.5)                                           | 0.1<br>(0.1 - 0.2)                                            |
| Czech Republic                   | 268931.3<br>(248106.3 - 290949.5)             | 12023.2<br>(11034.2 - 13079.3)                 | 34.7<br>(31.9 - 37.6)                                      | 1.6<br>(1.5 - 1.7)                                          | 101668.2<br>(90544.8 - 114801.4)                | 5663.7<br>(4740.7 - 6774.3)                      | 10.9<br>(9.7 - 12.2)                                         | 0.5<br>(0.5 - 0.6)                                            |
| Democratic Republic of the Congo | 455471.3<br>(195609.1 - 855370.4)             | 14633.1<br>(6109.9 - 27910.9)                  | 27<br>(11.9 - 50.6)                                        | 1<br>(0.4 - 2)                                              | 79224.9<br>(14392.2 - 211771.8)                 | 2943.9<br>(521 - 8248.1)                         | 4.8<br>(0.9 - 12.8)                                          | 0.2<br>(0 - 0.6)                                              |
| Denmark                          | 103308.4<br>(95273.8 - 113134)                | 5688<br>(5227.6 - 6239.5)                      | 23.8<br>(21.9 - 26)                                        | 1.3<br>(1.2 - 1.4)                                          | 84471.5<br>(78336.8 - 91174.8)                  | 5255.4<br>(4837.3 - 5730.9)                      | 17.4<br>(16 - 18.7)                                          | 1<br>(0.9 - 1)                                                |
| Djibouti                         | 11838.8<br>(4399.2 - 30455.8)                 | 386.5<br>(140.3 - 960)                         | 43.1<br>(16.6 - 105)                                       | 1.7<br>(0.7 - 3.9)                                          | 1319.5<br>(474.6 - 4450.2)                      | 45.6<br>(15.8 - 154)                             | 4.8<br>(1.8 - 15.7)                                          | 0.2<br>(0.1 - 0.6)                                            |
| Dominica                         | 568.1<br>(448.7 - 701.2)                      | 22.1<br>(17 - 28.1)                            | 16.8<br>(13.2 - 20.8)                                      | 0.7<br>(0.5 - 0.9)                                          | 96.1<br>(65.1 - 131.3)                          | 4.5<br>(2.8 - 6.4)                               | 2.6<br>(1.8 - 3.6)                                           | 0.1<br>(0.1 - 0.2)                                            |
| Dominican Republic               | 54252.3<br>(44522.5 - 65243.4)                | 2439.3<br>(1985.4 - 2936.1)                    | 13.8<br>(11.4 - 16.6)                                      | 0.7<br>(0.5 - 0.8)                                          | 33137<br>(27530.2 - 39553.3)                    | 1640.9<br>(1309.7 - 2085.2)                      | 7.9<br>(6.5 - 9.4)                                           | 0.4<br>(0.3 - 0.5)                                            |

| Country or Territory           | Male Smoking Attributable DALYs 2015 (95% UI) | Male Smoking Attributable Deaths 2015 (95% UI) | Male Smoking Attributable DALY Rate 2015, per 100 (95% UI) | Male Smoking Attributable Death Rate 2015, per 100 (95% UI) | Female Smoking Attributable DALYs 2015 (95% UI) | Female Smoking Attributable Deaths 2015 (95% UI) | Female Smoking Attributable DALY Rate 2015, per 100 (95% UI) | Female Smoking Attributable Death Rate 2015, per 100 (95% UI) |
|--------------------------------|-----------------------------------------------|------------------------------------------------|------------------------------------------------------------|-------------------------------------------------------------|-------------------------------------------------|--------------------------------------------------|--------------------------------------------------------------|---------------------------------------------------------------|
| Ecuador                        | 69002.4<br>(54896.2 - 85304.5)                | 3604.8<br>(2848 - 4473.5)                      | 12.1<br>(9.7 - 14.9)                                       | 0.7<br>(0.6 - 0.9)                                          | 21428.7<br>(15125.9 - 28248.7)                  | 1292.1<br>(888.8 - 1709.5)                       | 3.3<br>(2.4 - 4.4)                                           | 0.2<br>(0.1 - 0.3)                                            |
| Egypt                          | 1342571.8<br>(1172280.3 - 1524147.1)          | 45274.1<br>(39542.3 - 51391.3)                 | 43.5<br>(37.8 - 49.4)                                      | 1.8<br>(1.5 - 2)                                            | 79576.4<br>(57025.2 - 103011.3)                 | 2483.1<br>(1787.2 - 3353.8)                      | 2.3<br>(1.7 - 3)                                             | 0.1<br>(0.1 - 0.1)                                            |
| El Salvador                    | 20515.9<br>(15628.1 - 26550.2)                | 780.9<br>(569.2 - 1031.4)                      | 9<br>(6.8 - 11.7)                                          | 0.4<br>(0.3 - 0.5)                                          | 10568.5<br>(7282.8 - 14141.1)                   | 490.1<br>(304.5 - 694.9)                         | 3.6<br>(2.5 - 4.8)                                           | 0.2<br>(0.1 - 0.2)                                            |
| Equatorial Guinea              | 6049<br>(2277.3 - 21740.7)                    | 198.8<br>(72.5 - 704.8)                        | 23.3<br>(9.4 - 76.8)                                       | 1<br>(0.4 - 3)                                              | 2011.8<br>(171.3 - 8940.7)                      | 68.5<br>(5.2 - 296.8)                            | 9.1<br>(0.8 - 38.1)                                          | 0.4<br>(0 - 1.6)                                              |
| Eritrea                        | 28548.5<br>(9370 - 70584)                     | 804.4<br>(241.9 - 1994.2)                      | 23.6<br>(7.7 - 56.9)                                       | 0.8<br>(0.3 - 2)                                            | 4106.2<br>(719 - 16242)                         | 139.7<br>(25.9 - 527.1)                          | 3.4<br>(0.6 - 13.1)                                          | 0.1<br>(0 - 0.5)                                              |
| Estonia                        | 31575.4<br>(28441.9 - 34902)                  | 1420.6<br>(1274 - 1571.4)                      | 38.9<br>(35 - 43)                                          | 1.7<br>(1.6 - 1.9)                                          | 8176<br>(6875.2 - 9609.4)                       | 398.6<br>(317.6 - 500.8)                         | 6.6<br>(5.7 - 7.7)                                           | 0.3<br>(0.2 - 0.3)                                            |
| Ethiopia                       | 338194.7<br>(142757.7 - 782924.3)             | 11393.3<br>(4505.4 - 26188.2)                  | 14.8<br>(6.2 - 33.7)                                       | 0.6<br>(0.2 - 1.3)                                          | 39917.9<br>(15487.3 - 111124.9)                 | 1670.3<br>(674 - 4405.3)                         | 1.8<br>(0.7 - 4.8)                                           | 0.1<br>(0 - 0.2)                                              |
| Federated States of Micronesia | 1753.6<br>(1084.5 - 2899)                     | 58.9<br>(37.7 - 97.1)                          | 56.5<br>(36.1 - 92.1)                                      | 2.2<br>(1.4 - 3.5)                                          | 517.6<br>(267.8 - 968.5)                        | 18.4<br>(9.5 - 34.6)                             | 16.1<br>(8.4 - 29.8)                                         | 0.6<br>(0.3 - 1.2)                                            |
| Fiji                           | 18054.9<br>(12943.8 - 24324.2)                | 545.9<br>(389.6 - 734.4)                       | 45.7<br>(32.9 - 61.2)                                      | 1.6<br>(1.1 - 2.1)                                          | 3361.8<br>(2246.6 - 4741.5)                     | 109.4<br>(72.9 - 155.2)                          | 8.7<br>(5.8 - 12.3)                                          | 0.3<br>(0.2 - 0.5)                                            |
| Finland                        | 78775.6<br>(70823 - 87945.2)                  | 3895.4<br>(3504.9 - 4329.4)                    | 18.2<br>(16.3 - 20.3)                                      | 0.9<br>(0.8 - 1)                                            | 29393.5<br>(26223.8 - 32969.3)                  | 1531.4<br>(1307.7 - 1787.5)                      | 6<br>(5.3 - 6.7)                                             | 0.3<br>(0.2 - 0.3)                                            |
| France                         | 1234992.3<br>(1153562.5 - 1318153.4)          | 59120.5<br>(54489.1 - 63808)                   | 27.3<br>(25.5 - 29.2)                                      | 1.2<br>(1.1 - 1.3)                                          | 313740.4<br>(276506.3 - 350029.6)               | 17249.9<br>(13312.8 - 20977.4)                   | 6.3<br>(5.6 - 6.9)                                           | 0.2<br>(0.2 - 0.3)                                            |
| Gabon                          | 14023.2<br>(6979.3 - 29601.2)                 | 513.1<br>(254.3 - 1074.1)                      | 27.7<br>(13.9 - 58)                                        | 1.2<br>(0.6 - 2.4)                                          | 4407.8<br>(1158.6 - 10277.7)                    | 174<br>(41.7 - 414.2)                            | 8.6<br>(2.3 - 19.4)                                          | 0.4<br>(0.1 - 0.8)                                            |
| Georgia                        | 155322.4<br>(135036.6 - 175764.1)             | 6225.3<br>(5349.5 - 7130.3)                    | 69.6<br>(60.5 - 78.8)                                      | 2.8<br>(2.4 - 3.2)                                          | 12945.3<br>(10085.3 - 16382.3)                  | 525.5<br>(384.7 - 736)                           | 4.5<br>(3.6 - 5.6)                                           | 0.2<br>(0.1 - 0.2)                                            |
| Germany                        | 1706861.6<br>(1586648.8 - 1830848.9)          | 85343.9<br>(79061.6 - 91703.6)                 | 24.3<br>(22.6 - 26)                                        | 1.1<br>(1 - 1.2)                                            | 780908.9<br>(716628.8 - 842630.2)               | 44786.9<br>(39512 - 50140.3)                     | 9.9<br>(9.1 - 10.7)                                          | 0.4<br>(0.4 - 0.5)                                            |
| Ghana                          | 119490.2<br>(47975.1 - 276514.2)              | 4256.5<br>(1722.2 - 9507.4)                    | 18.5<br>(7.9 - 40.6)                                       | 0.8<br>(0.4 - 1.7)                                          | 23024<br>(6176.7 - 73118)                       | 1069.5<br>(293.5 - 3007.4)                       | 3.6<br>(1 - 10.4)                                            | 0.2<br>(0.1 - 0.5)                                            |
| Greece                         | 296225.3<br>(273479.9 - 319753)               | 15471.3<br>(14120.9 - 16796)                   | 35.6<br>(32.9 - 38.5)                                      | 1.6<br>(1.5 - 1.7)                                          | 101016.2<br>(89585.4 - 113091.9)                | 6368.4<br>(5319.9 - 7507.5)                      | 10<br>(9 - 11.2)                                             | 0.5<br>(0.4 - 0.5)                                            |
| Greenland                      | 1920.1<br>(1727.9 - 2145.9)                   | 71.3<br>(64.7 - 78.9)                          | 65.5<br>(59.5 - 72.2)                                      | 3.2<br>(2.9 - 3.5)                                          | 1096.8<br>(989.1 - 1242.5)                      | 41.4<br>(37.8 - 46.8)                            | 49.1<br>(44.8 - 55.2)                                        | 2.4<br>(2.2 - 2.7)                                            |
| Grenada                        | 1009.8<br>(818 - 1204.9)                      | 36.7<br>(29.9 - 43.7)                          | 24.6<br>(20.2 - 29.1)                                      | 1<br>(0.8 - 1.2)                                            | 260.1<br>(198.9 - 334.5)                        | 11.3<br>(8.3 - 15.1)                             | 5.7<br>(4.4 - 7.3)                                           | 0.2<br>(0.2 - 0.3)                                            |
| Guam                           | 4850.7<br>(3795.2 - 6128.7)                   | 182.7<br>(146.1 - 228.4)                       | 58.3<br>(46.3 - 73.1)                                      | 2.5<br>(2 - 3)                                              | 2029.5<br>(1530.2 - 2603.7)                     | 79<br>(58.9 - 99.1)                              | 23.5<br>(17.7 - 30)                                          | 0.9<br>(0.7 - 1.2)                                            |
| Guatemala                      | 51557.4<br>(37966.9 - 66873.6)                | 1703<br>(1222 - 2236.6)                        | 11.3<br>(8.1 - 14.6)                                       | 0.4<br>(0.3 - 0.6)                                          | 15729.1<br>(8856.1 - 24464.4)                   | 727.1<br>(352.4 - 1171.7)                        | 3.1<br>(1.7 - 4.8)                                           | 0.2<br>(0.1 - 0.3)                                            |
| Guinea                         | 84559.2<br>(29082 - 182918.2)                 | 2440<br>(796 - 5452.3)                         | 24.8<br>(8.8 - 54.1)                                       | 0.8<br>(0.3 - 1.8)                                          | 18116.2<br>(4152.7 - 46442.2)                   | 630.2<br>(137.8 - 1611.2)                        | 5.8<br>(1.4 - 14.5)                                          | 0.2<br>(0.1 - 0.6)                                            |
| Guinea-Bissau                  | 14961.4<br>(4194.1 - 54652.6)                 | 464<br>(125.4 - 1650.4)                        | 31.1<br>(9 - 107.9)                                        | 1.2<br>(0.3 - 3.8)                                          | 4299.8<br>(280.8 - 20705.4)                     | 147<br>(8.5 - 648.6)                             | 8.7<br>(0.6 - 38.9)                                          | 0.3<br>(0 - 1.4)                                              |
| Guyana                         | 10499.1<br>(7720.8 - 13464.4)                 | 340.6<br>(248.8 - 436.7)                       | 32.5<br>(24.2 - 41.3)                                      | 1.3<br>(0.9 - 1.6)                                          | 1667<br>(1093.2 - 2379)                         | 53.6<br>(35.6 - 75.5)                            | 4.8<br>(3.2 - 6.7)                                           | 0.2<br>(0.1 - 0.2)                                            |
| Haiti                          | 67123<br>(41747.2 - 93995.1)                  | 2212.6<br>(1360.2 - 3151.2)                    | 20.7<br>(12.9 - 29)                                        | 0.8<br>(0.5 - 1.1)                                          | 39735.2<br>(20971.4 - 63713.3)                  | 1454.2<br>(748.1 - 2362.5)                       | 11.3<br>(6 - 17.9)                                           | 0.5<br>(0.2 - 0.7)                                            |
| Honduras                       | 39563.7<br>(27247.3 - 57291)                  | 1430.8<br>(941.4 - 2203.8)                     | 16<br>(11 - 23.6)                                          | 0.7<br>(0.4 - 1)                                            | 12277.4<br>(4873.1 - 21578.7)                   | 509<br>(173.3 - 986.5)                           | 5<br>(1.9 - 8.7)                                             | 0.2<br>(0.1 - 0.4)                                            |
| Hungary                        | 333900.8<br>(306315.7 - 361592)               | 13972.5<br>(12794.3 - 15184.9)                 | 50.6<br>(46.5 - 54.8)                                      | 2.1<br>(1.9 - 2.3)                                          | 161786.4<br>(147247.4 - 178705)                 | 7597.7<br>(6724 - 8636.1)                        | 19<br>(17.3 - 20.9)                                          | 0.8<br>(0.7 - 0.8)                                            |

| Country or Territory | Male Smoking Attributable DALYs 2015 (95% UI) | Male Smoking Attributable Deaths 2015 (95% UI) | Male Smoking Attributable DALY Rate 2015, per 100 (95% UI) | Male Smoking Attributable Death Rate 2015, per 100 (95% UI) | Female Smoking Attributable DALYs 2015 (95% UI) | Female Smoking Attributable Deaths 2015 (95% UI) | Female Smoking Attributable DALY Rate 2015, per 100 (95% UI) | Female Smoking Attributable Death Rate 2015, per 100 (95% UI) |
|----------------------|-----------------------------------------------|------------------------------------------------|------------------------------------------------------------|-------------------------------------------------------------|-------------------------------------------------|--------------------------------------------------|--------------------------------------------------------------|---------------------------------------------------------------|
| Iceland              | 2877<br>(2571.9 - 3195.3)                     | 147.8<br>(131.5 - 163.6)                       | 14.2<br>(12.7 - 15.8)                                      | 0.7<br>(0.6 - 0.8)                                          | 2063.5<br>(1794.2 - 2349.6)                     | 118.3<br>(99.2 - 137.7)                          | 9.4<br>(8.2 - 10.8)                                          | 0.5<br>(0.4 - 0.5)                                            |
| India                | 17630850<br>(15397011 - 20250192)             | 627974.9<br>(542341.7 - 724523.6)              | 34.9<br>(30.4 - 39.9)                                      | 1.5<br>(1.2 - 1.7)                                          | 2922610.3<br>(2044289.9 - 3891200.5)            | 115509.6<br>(79022.3 - 156903.6)                 | 6.1<br>(4.2 - 8.1)                                           | 0.3<br>(0.2 - 0.4)                                            |
| Indonesia            | 4869017.5<br>(3597240 - 6275432.5)            | 156664<br>(112804.2 - 201676.5)                | 47.3<br>(34.9 - 60.4)                                      | 1.9<br>(1.4 - 2.4)                                          | 685382.3<br>(451664.3 - 994825.6)               | 23384.1<br>(15286.9 - 34030.2)                   | 6.4<br>(4.2 - 9.2)                                           | 0.3<br>(0.2 - 0.4)                                            |
| Iran                 | 893756.8<br>(647892.1 - 1213038)              | 30808.7<br>(22207.3 - 41447.5)                 | 28.7<br>(21 - 38.4)                                        | 1.2<br>(0.8 - 1.5)                                          | 117948.9<br>(59617.2 - 194806.6)                | 4234.9<br>(1941.9 - 7130.3)                      | 4<br>(2 - 6.6)                                               | 0.2<br>(0.1 - 0.3)                                            |
| Iraq                 | 440150.9<br>(282377.7 - 638103.4)             | 14409.1<br>(8923.8 - 20395.7)                  | 52.1<br>(33.5 - 72.5)                                      | 2.1<br>(1.3 - 2.8)                                          | 96339.5<br>(56742.6 - 150977.4)                 | 3405.6<br>(1980.6 - 5313)                        | 10.5<br>(6.2 - 16.2)                                         | 0.4<br>(0.3 - 0.7)                                            |
| Ireland              | 58278.2<br>(53222.9 - 63713.5)                | 3070.9<br>(2785.9 - 3359.3)                    | 21.6<br>(19.8 - 23.6)                                      | 1.2<br>(1.1 - 1.3)                                          | 32161.6<br>(27751.7 - 37228.2)                  | 2098.3<br>(1749.4 - 2514.3)                      | 10.6<br>(9.2 - 12.4)                                         | 0.6<br>(0.5 - 0.7)                                            |
| Israel               | 69718<br>(63457.3 - 76580.4)                  | 3341.1<br>(3008.3 - 3687.2)                    | 17.9<br>(16.3 - 19.7)                                      | 0.8<br>(0.8 - 0.9)                                          | 27416.3<br>(24326.4 - 30921.8)                  | 1675.5<br>(1431.4 - 1964.5)                      | 5.9<br>(5.2 - 6.6)                                           | 0.3<br>(0.3 - 0.4)                                            |
| Italy                | 1140140.3<br>(1055475.1 - 1224550.6)          | 68685.4<br>(63029.5 - 74455.4)                 | 22.3<br>(20.6 - 24)                                        | 1.2<br>(1.1 - 1.3)                                          | 385958.1<br>(341480.8 - 430356.4)               | 27232.2<br>(22933.7 - 31845)                     | 6.3<br>(5.6 - 6.9)                                           | 0.3<br>(0.3 - 0.4)                                            |
| Jamaica              | 29083.7<br>(23705.4 - 35659)                  | 1287.8<br>(1028.7 - 1586.4)                    | 22.8<br>(18.6 - 27.9)                                      | 1<br>(0.8 - 1.3)                                            | 8931.2<br>(6591.9 - 11535.7)                    | 442.2<br>(302.6 - 611.1)                         | 6.6<br>(4.9 - 8.6)                                           | 0.3<br>(0.2 - 0.4)                                            |
| Japan                | 2117245.3<br>(1947749.6 - 2283110.5)          | 133915.2<br>(123133.9 - 144860.6)              | 17.6<br>(16.1 - 19)                                        | 1<br>(0.9 - 1)                                              | 373176.3<br>(308593.4 - 433966)                 | 32277.4<br>(26541.6 - 37497.1)                   | 2.6<br>(2.2 - 3)                                             | 0.1<br>(0.1 - 0.2)                                            |
| Jordan               | 56931.1<br>(45697.5 - 70567.4)                | 1835.1<br>(1469.3 - 2280)                      | 26.5<br>(21.3 - 32.7)                                      | 1.1<br>(0.9 - 1.4)                                          | 8257.2<br>(5859.6 - 10977.2)                    | 258.6<br>(166.5 - 363.9)                         | 3.9<br>(2.7 - 5.3)                                           | 0.2<br>(0.1 - 0.2)                                            |
| Kazakhstan           | 596421.9<br>(523003.3 - 675959.1)             | 20858.6<br>(18305.9 - 23629.2)                 | 85.7<br>(75.2 - 97.2)                                      | 3.5<br>(3.1 - 4)                                            | 77207.8<br>(60652.9 - 95555.3)                  | 2787<br>(2117.2 - 3577.7)                        | 8.4<br>(6.5 - 10.4)                                          | 0.3<br>(0.2 - 0.4)                                            |
| Kenya                | 182463.4<br>(137432.7 - 237868.7)             | 5696.1<br>(4267 - 7439.9)                      | 17.4<br>(13.2 - 22.5)                                      | 0.7<br>(0.5 - 0.9)                                          | 17573.2<br>(12692 - 24516.4)                    | 797.3<br>(605.1 - 1048.1)                        | 2<br>(1.5 - 2.6)                                             | 0.1<br>(0.1 - 0.1)                                            |
| Kiribati             | 4034.1<br>(3108.8 - 5057.8)                   | 122.6<br>(95.9 - 153.1)                        | 120.2<br>(94.9 - 148.8)                                    | 4.6<br>(3.7 - 5.6)                                          | 1574.8<br>(1186.9 - 2071.2)                     | 56.5<br>(42.8 - 73.6)                            | 42.9<br>(32.7 - 55.5)                                        | 1.8<br>(1.4 - 2.4)                                            |
| Kuwait               | 24151.6<br>(18540.7 - 30626.6)                | 611.9<br>(464.7 - 797.6)                       | 15.6<br>(11.9 - 19.9)                                      | 0.6<br>(0.5 - 0.8)                                          | 2081.2<br>(1410.1 - 2885.7)                     | 56.2<br>(36.9 - 80.1)                            | 2.6<br>(1.7 - 3.7)                                           | 0.1<br>(0.1 - 0.2)                                            |
| Kyrgyzstan           | 121145.9<br>(106385.8 - 137778.4)             | 4134.2<br>(3614.1 - 4708)                      | 65.4<br>(57.5 - 73.9)                                      | 2.6<br>(2.3 - 3)                                            | 11531.1<br>(8473.1 - 15050.5)                   | 399<br>(291.5 - 531.5)                           | 5.2<br>(3.9 - 6.9)                                           | 0.2<br>(0.1 - 0.3)                                            |
| Laos                 | 117420.3<br>(90370.5 - 146755.4)              | 4111.8<br>(3171.7 - 5071.5)                    | 68.2<br>(53.5 - 84.1)                                      | 3<br>(2.4 - 3.6)                                            | 40114.8<br>(26632.9 - 57824.5)                  | 1439<br>(925.2 - 2129.1)                         | 20.3<br>(13.5 - 29)                                          | 0.9<br>(0.5 - 1.3)                                            |
| Latvia               | 72130.3<br>(65285.4 - 79229.6)                | 3021.6<br>(2720.6 - 3358.9)                    | 54.2<br>(49.1 - 59.4)                                      | 2.3<br>(2.1 - 2.5)                                          | 14779<br>(12504.9 - 17220.4)                    | 674.5<br>(537.3 - 850.6)                         | 7.7<br>(6.6 - 8.8)                                           | 0.3<br>(0.2 - 0.3)                                            |
| Lebanon              | 72949.3<br>(45228.1 - 106272.3)               | 2924<br>(1713.8 - 4371.5)                      | 27.4<br>(17.1 - 39.7)                                      | 1.2<br>(0.7 - 1.8)                                          | 41262.4<br>(25900.1 - 57853.1)                  | 1830<br>(1138.1 - 2575.5)                        | 16.8<br>(10.6 - 23.6)                                        | 0.8<br>(0.5 - 1.1)                                            |
| Lesotho              | 57139.8<br>(20651.3 - 106448.6)               | 1938.6<br>(746.8 - 3415.7)                     | 124.2<br>(46.5 - 225.3)                                    | 4.8<br>(2 - 8.1)                                            | 9700.3<br>(1875.3 - 25815.5)                    | 395.7<br>(68.5 - 1032.4)                         | 16.5<br>(3.1 - 43.7)                                         | 0.7<br>(0.1 - 1.8)                                            |
| Liberia              | 18978.2<br>(9983.7 - 36035.7)                 | 630.6<br>(321.1 - 1213.7)                      | 18.4<br>(9.8 - 34.1)                                       | 0.8<br>(0.4 - 1.4)                                          | 4343.8<br>(1173.6 - 10826.8)                    | 161<br>(38.5 - 390.8)                            | 4.1<br>(1.1 - 9.8)                                           | 0.2<br>(0 - 0.4)                                              |
| Libya                | 78366.4<br>(60007 - 99131.2)                  | 2716.2<br>(2099.3 - 3491.4)                    | 36.8<br>(28.4 - 46.6)                                      | 1.6<br>(1.2 - 2.1)                                          | 3590.1<br>(1515.2 - 5911.8)                     | 112<br>(47.7 - 188.9)                            | 1.6<br>(0.7 - 2.6)                                           | 0.1<br>(0 - 0.1)                                              |
| Lithuania            | 99234.9<br>(90109.1 - 108809.6)               | 4066.1<br>(3681.1 - 4469.6)                    | 52.8<br>(47.9 - 57.8)                                      | 2.2<br>(2 - 2.4)                                            | 15158.8<br>(12796.2 - 17772.4)                  | 589.2<br>(465.7 - 733.3)                         | 5.9<br>(5 - 6.8)                                             | 0.2<br>(0.2 - 0.2)                                            |
| Luxembourg           | 7869.4<br>(7169 - 8555.7)                     | 383.7<br>(347.4 - 416.9)                       | 22.2<br>(20.2 - 24.1)                                      | 1.1<br>(1 - 1.2)                                            | 3278<br>(2868.1 - 3668)                         | 191.3<br>(158.4 - 223.6)                         | 8.2<br>(7.2 - 9.2)                                           | 0.4<br>(0.3 - 0.4)                                            |
| Macedonia            | 59531.3<br>(53602.6 - 65409.1)                | 2302.7<br>(2058.4 - 2567.5)                    | 46.3<br>(41.6 - 50.9)                                      | 1.9<br>(1.7 - 2.1)                                          | 19290<br>(16422.7 - 22354.2)                    | 774.3<br>(630.3 - 946.1)                         | 13.7<br>(11.7 - 15.8)                                        | 0.5<br>(0.4 - 0.7)                                            |
| Madagascar           | 220907.3<br>(81685.3 - 462194.8)              | 6572.2<br>(2435.9 - 13736.2)                   | 35.8<br>(13.9 - 72.5)                                      | 1.3<br>(0.5 - 2.6)                                          | 23645.5<br>(8381.8 - 62207.9)                   | 767.6<br>(273.7 - 1940.4)                        | 3.8<br>(1.5 - 9.7)                                           | 0.1<br>(0.1 - 0.3)                                            |

| Country or Territory     | Male Smoking Attributable DALYs 2015 (95% UI) | Male Smoking Attributable Deaths 2015 (95% UI) | Male Smoking Attributable DALY Rate 2015, per 100 (95% UI) | Male Smoking Attributable Death Rate 2015, per 100 (95% UI) | Female Smoking Attributable DALYs 2015 (95% UI) | Female Smoking Attributable Deaths 2015 (95% UI) | Female Smoking Attributable DALY Rate 2015, per 100 (95% UI) | Female Smoking Attributable Death Rate 2015, per 100 (95% UI) |
|--------------------------|-----------------------------------------------|------------------------------------------------|------------------------------------------------------------|-------------------------------------------------------------|-------------------------------------------------|--------------------------------------------------|--------------------------------------------------------------|---------------------------------------------------------------|
| Malawi                   | 83949.1<br>(39601.6 - 176250.8)               | 2930.6<br>(1340.4 - 6182.9)                    | 24.8<br>(11.9 - 52.4)                                      | 1<br>(0.5 - 2.1)                                            | 12967<br>(5943.8 - 28579.3)                     | 588.4<br>(263.2 - 1299.4)                        | 3.7<br>(1.7 - 8)                                             | 0.2<br>(0.1 - 0.4)                                            |
| Malaysia                 | 538144.7<br>(439569 - 655940.8)               | 20324.3<br>(16650.9 - 24718.1)                 | 45.6<br>(37.7 - 55.3)                                      | 2.1<br>(1.7 - 2.5)                                          | 72127.9<br>(55144.6 - 90801.4)                  | 3126.8<br>(2354.8 - 4119.9)                      | 6.8<br>(5.3 - 8.6)                                           | 0.4<br>(0.3 - 0.5)                                            |
| Maldives                 | 1719.0<br>(1309.8 - 2187.6)                   | 64.4<br>(46.5 - 87.3)                          | 14.7<br>(11.1 - 18.9)                                      | 0.6<br>(0.5 - 0.9)                                          | 317.2<br>(226.8 - 428.3)                        | 11.5<br>(7.8 - 17.4)                             | 2.8<br>(2 - 3.8)                                             | 0.1<br>(0.1 - 0.2)                                            |
| Mali                     | 47457.6<br>(22331.4 - 106056.9)               | 1444.1<br>(652.8 - 3279.6)                     | 13.5<br>(6.4 - 29.8)                                       | 0.5<br>(0.2 - 1.1)                                          | 10441.1<br>(2483.5 - 34367.7)                   | 369.1<br>(81.3 - 1221.1)                         | 2.9<br>(0.7 - 9.4)                                           | 0.1<br>(0 - 0.4)                                              |
| Malta                    | 6688.5<br>(5994.8 - 7375.7)                   | 333.4<br>(299.7 - 366.5)                       | 21.1<br>(19 - 23.3)                                        | 1.1<br>(0.9 - 1.2)                                          | 1379.8<br>(1128.9 - 1644.9)                     | 67.8<br>(51.1 - 86.5)                            | 4.1<br>(3.4 - 4.8)                                           | 0.2<br>(0.1 - 0.2)                                            |
| Marshall Islands         | 1374.2<br>(1007.8 - 1795.4)                   | 38.6<br>(28.4 - 50.4)                          | 56.8<br>(42.4 - 73.5)                                      | 2<br>(1.5 - 2.5)                                            | 309.3<br>(206.2 - 439.7)                        | 10.1<br>(6.8 - 14.3)                             | 13.6<br>(9.2 - 18.9)                                         | 0.5<br>(0.4 - 0.8)                                            |
| Mauritania               | 17063.9<br>(6488.2 - 34842.2)                 | 511.3<br>(166.4 - 1053.4)                      | 15.9<br>(5.9 - 31.4)                                       | 0.6<br>(0.2 - 1.2)                                          | 4792<br>(1287.2 - 12116.4)                      | 165<br>(36 - 423.7)                              | 4.4<br>(1.1 - 10.9)                                          | 0.2<br>(0 - 0.5)                                              |
| Mauritius                | 22800.9<br>(19099.6 - 26605.7)                | 849.1<br>(722.6 - 985.6)                       | 34.2<br>(28.8 - 39.8)                                      | 1.5<br>(1.3 - 1.7)                                          | 2408.6<br>(1676.6 - 3211.5)                     | 96.8<br>(59.7 - 136.9)                           | 3.2<br>(2.2 - 4.2)                                           | 0.1<br>(0.1 - 0.2)                                            |
| Mexico                   | 618476.8<br>(529328 - 705138.9)               | 28153.8<br>(24727.3 - 31386.1)                 | 13.6<br>(11.7 - 15.4)                                      | 0.7<br>(0.6 - 0.8)                                          | 189667.6<br>(155782 - 220906.8)                 | 10291.9<br>(8092 - 12368.1)                      | 3.7<br>(3.1 - 4.3)                                           | 0.2<br>(0.2 - 0.3)                                            |
| Moldova                  | 106011.4<br>(95199.3 - 116008.2)              | 3892.1<br>(3461.1 - 4299)                      | 48.3<br>(43.3 - 53.1)                                      | 1.9<br>(1.7 - 2.1)                                          | 9859.7<br>(7798.4 - 12233.1)                    | 337.9<br>(256.9 - 424.5)                         | 3.5<br>(2.8 - 4.3)                                           | 0.1<br>(0.1 - 0.1)                                            |
| Mongolia                 | 88578.9<br>(77302.8 - 100599.6)               | 2960.1<br>(2583 - 3351.1)                      | 92.3<br>(81.1 - 104.4)                                     | 3.9<br>(3.4 - 4.4)                                          | 15261.2<br>(12423.3 - 18385.8)                  | 602.4<br>(489.6 - 738.2)                         | 15<br>(12.3 - 18.1)                                          | 0.7<br>(0.6 - 0.9)                                            |
| Montenegro               | 19435.1<br>(17199.2 - 21745.4)                | 808.8<br>(708.1 - 911)                         | 49.6<br>(44 - 55.4)                                        | 2.1<br>(1.8 - 2.4)                                          | 8147.4<br>(6962.1 - 9542.8)                     | 361.5<br>(292.7 - 448.2)                         | 18.3<br>(15.7 - 21.3)                                        | 0.8<br>(0.6 - 0.9)                                            |
| Morocco                  | 357418.1<br>(222432.7 - 549236.6)             | 12359.7<br>(7285.9 - 19968.4)                  | 25.5<br>(16 - 39)                                          | 1<br>(0.6 - 1.6)                                            | 55833<br>(22026.4 - 100783.5)                   | 2071.4<br>(801.2 - 3681.9)                       | 3.7<br>(1.5 - 6.6)                                           | 0.2<br>(0.1 - 0.3)                                            |
| Mozambique               | 245573.3<br>(86770.4 - 514699.9)              | 8210.7<br>(2779.2 - 16915.2)                   | 42.8<br>(15.5 - 87.7)                                      | 1.7<br>(0.6 - 3.2)                                          | 51063.8<br>(19803.9 - 132607.7)                 | 1951.2<br>(693.8 - 5141.3)                       | 7.6<br>(3 - 19.4)                                            | 0.3<br>(0.1 - 0.8)                                            |
| Myanmar                  | 1292920.3<br>(765776.3 - 1955094.3)           | 47619.2<br>(27638.2 - 70344)                   | 68.8<br>(41.8 - 100.1)                                     | 3.1<br>(1.9 - 4.4)                                          | 419944.3<br>(223735.4 - 702325.6)               | 17658<br>(9207.9 - 29431.1)                      | 19.9<br>(10.8 - 32.7)                                        | 1<br>(0.5 - 1.6)                                              |
| Namibia                  | 17876.8<br>(8130.1 - 36533)                   | 621.8<br>(280.7 - 1249.3)                      | 32.1<br>(15.1 - 63.3)                                      | 1.4<br>(0.7 - 2.6)                                          | 6288.9<br>(3519.1 - 14037.5)                    | 285.4<br>(155.9 - 602.6)                         | 10<br>(5.6 - 21)                                             | 0.5<br>(0.3 - 1.1)                                            |
| Nepal                    | 315462<br>(202328.1 - 461320.4)               | 12000.8<br>(7757.1 - 17462.7)                  | 34.4<br>(22.4 - 49.6)                                      | 1.5<br>(1 - 2.2)                                            | 202915<br>(119203.5 - 333597.2)                 | 8549.6<br>(4770.7 - 14353.1)                     | 20.9<br>(12.2 - 34.2)                                        | 1<br>(0.6 - 1.7)                                              |
| Netherlands              | 336994.6<br>(310274.6 - 364049.4)             | 18226.2<br>(16739.3 - 19679.1)                 | 26.4<br>(24.3 - 28.5)                                      | 1.4<br>(1.3 - 1.6)                                          | 206659.3<br>(189714.1 - 224153.1)               | 11861<br>(10685.1 - 13098.7)                     | 14.8<br>(13.6 - 16)                                          | 0.7<br>(0.7 - 0.8)                                            |
| New Zealand              | 45876.6<br>(41424.1 - 50614.5)                | 2483.7<br>(2231.6 - 2736)                      | 15.9<br>(14.3 - 17.5)                                      | 0.8<br>(0.7 - 0.9)                                          | 35958.6<br>(32991.4 - 39212.5)                  | 2041.7<br>(1853.1 - 2248.1)                      | 11.2<br>(10.3 - 12.3)                                        | 0.6<br>(0.5 - 0.6)                                            |
| Nicaragua                | 16125.6<br>(12007.7 - 20726.3)                | 615.3<br>(448.2 - 795.2)                       | 8.5<br>(6.3 - 10.9)                                        | 0.4<br>(0.3 - 0.5)                                          | 6828<br>(4672.2 - 9404.3)                       | 265.8<br>(164.1 - 406.9)                         | 3<br>(2 - 4.2)                                               | 0.1<br>(0.1 - 0.2)                                            |
| Niger                    | 58424.3<br>(24013.8 - 135054)                 | 1702.8<br>(635.2 - 4064.8)                     | 12.2<br>(4.9 - 28)                                         | 0.4<br>(0.2 - 1)                                            | 7341.4<br>(1792.6 - 22936.9)                    | 276.9<br>(59 - 894.5)                            | 1.9<br>(0.5 - 6)                                             | 0.1<br>(0 - 0.3)                                              |
| Nigeria                  | 424405.4<br>(263517 - 906477.9)               | 13781.5<br>(8536.3 - 29389.5)                  | 10.4<br>(6.6 - 21.3)                                       | 0.4<br>(0.3 - 0.9)                                          | 112242.4<br>(41536.8 - 324211.4)                | 4539<br>(1631.3 - 12859.9)                       | 3.3<br>(1.2 - 8.8)                                           | 0.2<br>(0.1 - 0.5)                                            |
| North Korea              | 880086.8<br>(633976.2 - 1188353.9)            | 32208.6<br>(23047.3 - 42797.4)                 | 76.3<br>(55.9 - 99.9)                                      | 3.5<br>(2.6 - 4.5)                                          | 343090.7<br>(228294.4 - 494444.5)               | 17194.5<br>(11081.4 - 25070.5)                   | 22.8<br>(15.2 - 33)                                          | 1.2<br>(0.8 - 1.8)                                            |
| Northern Mariana Islands | 1553.6<br>(1259.8 - 1886.5)                   | 40.2<br>(33.2 - 49)                            | 48.8<br>(41.7 - 57.2)                                      | 2.3<br>(2 - 2.6)                                            | 482.2<br>(375.3 - 600.5)                        | 13.2<br>(10.5 - 16.4)                            | 19.9<br>(16.4 - 23.9)                                        | 0.9<br>(0.8 - 1.1)                                            |
| Norway                   | 60426.2<br>(54797.1 - 66789.6)                | 3247.9<br>(2938.1 - 3594.5)                    | 17.1<br>(15.5 - 18.9)                                      | 0.9<br>(0.8 - 1)                                            | 44016.5<br>(40085.6 - 48360.8)                  | 2919.4<br>(2561.5 - 3312.9)                      | 11<br>(10.1 - 12.1)                                          | 0.6<br>(0.5 - 0.7)                                            |
| Oman                     | 19579.9<br>(14148.2 - 25508.8)                | 498.6<br>(345.6 - 668.8)                       | 11.4<br>(8 - 14.7)                                         | 0.4<br>(0.3 - 0.6)                                          | 1444.9<br>(895.8 - 2203.1)                      | 42.7<br>(25 - 66.8)                              | 1.7<br>(1 - 2.7)                                             | 0.1<br>(0 - 0.1)                                              |

| Country or Territory             | Male Smoking Attributable DALYs 2015 (95% UI) | Male Smoking Attributable Deaths 2015 (95% UI) | Male Smoking Attributable DALY Rate 2015, per 100 (95% UI) | Male Smoking Attributable Death Rate 2015, per 100 (95% UI) | Female Smoking Attributable DALYs 2015 (95% UI) | Female Smoking Attributable Deaths 2015 (95% UI) | Female Smoking Attributable DALY Rate 2015, per 100 (95% UI) | Female Smoking Attributable Death Rate 2015, per 100 (95% UI) |
|----------------------------------|-----------------------------------------------|------------------------------------------------|------------------------------------------------------------|-------------------------------------------------------------|-------------------------------------------------|--------------------------------------------------|--------------------------------------------------------------|---------------------------------------------------------------|
| Pakistan                         | 2999330.3<br>(2325953.8 - 3881463.3)          | 101955.5<br>(78295.9 - 131764.8)               | 50.1<br>(39 - 64.4)                                        | 1.9<br>(1.5 - 2.5)                                          | 647067.8<br>(397580.3 - 961277.4)               | 22000.6<br>(13356.5 - 33221.4)                   | 11.4<br>(7.1 - 17)                                           | 0.4<br>(0.3 - 0.7)                                            |
| Palestine                        | 49575.3<br>(34435.2 - 69362.7)                | 1577<br>(1080 - 2187.4)                        | 44.8<br>(31.4 - 61.4)                                      | 1.8<br>(1.3 - 2.4)                                          | 4932.1<br>(2983.3 - 7785)                       | 148.2<br>(87.8 - 240.9)                          | 4.2<br>(2.5 - 6.6)                                           | 0.2<br>(0.1 - 0.3)                                            |
| Panama                           | 13866.9<br>(10250.7 - 18019)                  | 711.4<br>(534.1 - 926.4)                       | 8.7<br>(6.5 - 11.2)                                        | 0.5<br>(0.4 - 0.6)                                          | 4578.1<br>(2784.1 - 6605.8)                     | 283.8<br>(152.6 - 418.9)                         | 2.6<br>(1.6 - 3.8)                                           | 0.2<br>(0.1 - 0.2)                                            |
| Papua New Guinea                 | 213877.2<br>(126971.4 - 345965.6)             | 6357.9<br>(3672.5 - 10137.8)                   | 100.1<br>(60.2 - 154.5)                                    | 3.9<br>(2.4 - 5.9)                                          | 134868<br>(75862.5 - 227575.2)                  | 4311.5<br>(2364.5 - 7351.4)                      | 60.2<br>(34 - 101.1)                                         | 2.3<br>(1.2 - 3.8)                                            |
| Paraguay                         | 54176.2<br>(42769.8 - 68182.8)                | 2307.4<br>(1803.6 - 2885.9)                    | 23.6<br>(18.7 - 29.6)                                      | 1.1<br>(0.9 - 1.4)                                          | 20224.7<br>(14398.8 - 27002.4)                  | 974.1<br>(646.1 - 1386.7)                        | 8.7<br>(6.1 - 11.6)                                          | 0.4<br>(0.3 - 0.6)                                            |
| Peru                             | 91182.4<br>(68790.5 - 118908.4)               | 3871.8<br>(2853.4 - 5170.7)                    | 7.7<br>(5.8 - 10)                                          | 0.4<br>(0.3 - 0.5)                                          | 45468.6<br>(31073.3 - 61254.6)                  | 2517.7<br>(1589.8 - 3457)                        | 3.5<br>(2.4 - 4.7)                                           | 0.2<br>(0.1 - 0.3)                                            |
| Philippines                      | 2084914.6<br>(1820989.6 - 2367003.8)          | 70955.2<br>(61861.2 - 80987.5)                 | 65.1<br>(56.9 - 73.8)                                      | 2.8<br>(2.4 - 3.2)                                          | 564413.4<br>(466925.3 - 673995.9)               | 23038.9<br>(18305 - 28632.6)                     | 17<br>(14 - 20.5)                                            | 0.8<br>(0.6 - 1.1)                                            |
| Poland                           | 1184039.9<br>(1104374.4 - 1263770.3)          | 49459.8<br>(46325.6 - 52644.6)                 | 47.2<br>(44.1 - 50.4)                                      | 2<br>(1.9 - 2.2)                                            | 391454.1<br>(355358.8 - 428930.5)               | 17315.3<br>(15199.9 - 19799.1)                   | 12.5<br>(11.4 - 13.6)                                        | 0.5<br>(0.4 - 0.6)                                            |
| Portugal                         | 192728.3<br>(178994.2 - 206649.8)             | 9009<br>(8249.1 - 9766.1)                      | 25.5<br>(23.7 - 27.4)                                      | 1.1<br>(1 - 1.2)                                            | 35892.9<br>(28376.5 - 42488.2)                  | 1696.7<br>(972.9 - 2316.1)                       | 4.2<br>(3.5 - 4.9)                                           | 0.1<br>(0.1 - 0.2)                                            |
| Puerto Rico                      | 30235.2<br>(25767.7 - 35181.6)                | 1539.2<br>(1313.3 - 1787.5)                    | 14.4<br>(12.3 - 16.8)                                      | 0.7<br>(0.6 - 0.8)                                          | 14717.9<br>(12105.8 - 17566.1)                  | 1093.3<br>(878.6 - 1342.1)                       | 5.2<br>(4.2 - 6.2)                                           | 0.3<br>(0.3 - 0.4)                                            |
| Qatar                            | 7107.9<br>(4857.4 - 9849.4)                   | 168.3<br>(105.1 - 251.5)                       | 9.2<br>(6.1 - 13.3)                                        | 0.4<br>(0.3 - 0.6)                                          | 596<br>(265.8 - 1004.6)                         | 13.4<br>(5.6 - 23.7)                             | 1.6<br>(0.8 - 2.8)                                           | 0.1<br>(0 - 0.1)                                              |
| Romania                          | 659691.2<br>(602955.5 - 719945.8)             | 26231.4<br>(23825.2 - 28905.4)                 | 49.5<br>(45.2 - 54)                                        | 1.9<br>(1.8 - 2.1)                                          | 158408.6<br>(137544.9 - 181821.6)               | 6530.2<br>(5422.1 - 7946.1)                      | 10.2<br>(8.9 - 11.6)                                         | 0.4<br>(0.3 - 0.4)                                            |
| Russia                           | 6525610<br>(5964684.5 - 7088856)              | 249095.9<br>(227470.3 - 272119.3)              | 77.3<br>(70.6 - 83.9)                                      | 3.1<br>(2.8 - 3.4)                                          | 983974.8<br>(852629.5 - 1128219.1)              | 33482.6<br>(28361 - 39553.8)                     | 8.6<br>(7.5 - 9.8)                                           | 0.3<br>(0.2 - 0.3)                                            |
| Rwanda                           | 48823.8<br>(23597.4 - 107571)                 | 1613<br>(761.1 - 3593.7)                       | 21.7<br>(10.6 - 47.2)                                      | 0.9<br>(0.4 - 1.9)                                          | 20127.4<br>(9430.3 - 44314.1)                   | 793.5<br>(369.9 - 1704.7)                        | 7.3<br>(3.6 - 15.4)                                          | 0.3<br>(0.2 - 0.7)                                            |
| Saint Lucia                      | 1540.5<br>(1247.8 - 1872.2)                   | 60.1<br>(47.8 - 73.5)                          | 17.6<br>(14.3 - 21.5)                                      | 0.7<br>(0.6 - 0.9)                                          | 330.5<br>(242.3 - 434.7)                        | 16.8<br>(11.1 - 22.8)                            | 3.4<br>(2.5 - 4.5)                                           | 0.2<br>(0.1 - 0.2)                                            |
| Saint Vincent and the Grenadines | 1136.3<br>(927.4 - 1369.7)                    | 42.4<br>(34.4 - 51.7)                          | 22.6<br>(18.4 - 27.3)                                      | 0.9<br>(0.8 - 1.2)                                          | 205.2<br>(153.4 - 261.1)                        | 8.5<br>(6.1 - 11.1)                              | 4<br>(3 - 5.1)                                               | 0.2<br>(0.1 - 0.2)                                            |
| Samoa                            | 2526.1<br>(1856.6 - 3442.5)                   | 84.4<br>(61.8 - 115.3)                         | 38.7<br>(28.7 - 51.9)                                      | 1.5<br>(1.1 - 2)                                            | 914.5<br>(608.2 - 1311.6)                       | 33.3<br>(21.8 - 48.3)                            | 13.5<br>(9 - 19.4)                                           | 0.5<br>(0.3 - 0.8)                                            |
| Sao Tome and Principe            | 1096.8<br>(341.6 - 2314)                      | 46.5<br>(15.6 - 91.6)                          | 30.3<br>(10.2 - 61)                                        | 1.5<br>(0.5 - 2.8)                                          | 468.1<br>(63.6 - 1198.9)                        | 20<br>(2.5 - 49.7)                               | 10.9<br>(1.5 - 27)                                           | 0.5<br>(0.1 - 1.2)                                            |
| Saudi Arabia                     | 155050.9<br>(124064.1 - 187999.4)             | 4307.2<br>(3422.2 - 5296.4)                    | 12.2<br>(9.9 - 14.8)                                       | 0.5<br>(0.4 - 0.6)                                          | 12090.6<br>(9132.4 - 15632.6)                   | 432.1<br>(325 - 567.5)                           | 1.6<br>(1.2 - 2.1)                                           | 0.1<br>(0.1 - 0.1)                                            |
| Senegal                          | 72018.6<br>(27286.4 - 190258.5)               | 2296<br>(857.5 - 5962.3)                       | 22.6<br>(8.7 - 58.2)                                       | 0.9<br>(0.3 - 2.1)                                          | 17662<br>(2974 - 57540.7)                       | 677.1<br>(102.7 - 2145.3)                        | 5.1<br>(0.9 - 15.6)                                          | 0.2<br>(0 - 0.7)                                              |
| Serbia                           | 281211<br>(259115.1 - 303234.7)               | 11757.4<br>(10816.3 - 12721.2)                 | 46.4<br>(42.7 - 49.9)                                      | 1.9<br>(1.8 - 2.1)                                          | 111039.8<br>(98883.8 - 125311.9)                | 4968.3<br>(4278.1 - 5806.2)                      | 15.9<br>(14.2 - 17.7)                                        | 0.6<br>(0.6 - 0.7)                                            |
| Seychelles                       | 1781.8<br>(1448.5 - 2166)                     | 63.2<br>(51.3 - 77)                            | 39.7<br>(32.6 - 47.8)                                      | 1.7<br>(1.4 - 2)                                            | 239<br>(161.1 - 335.5)                          | 10.5<br>(6.8 - 15.3)                             | 5<br>(3.4 - 7)                                               | 0.2<br>(0.1 - 0.3)                                            |
| Sierra Leone                     | 57077.1<br>(25650.9 - 109585.4)               | 1747.2<br>(758.5 - 3373.4)                     | 37.7<br>(17.5 - 70.7)                                      | 1.4<br>(0.7 - 2.7)                                          | 18300.8<br>(6917.1 - 39350.3)                   | 592.6<br>(204.6 - 1275.5)                        | 11.9<br>(4.5 - 25.1)                                         | 0.5<br>(0.2 - 1)                                              |
| Singapore                        | 39332.1<br>(34512.7 - 44637.4)                | 2101.2<br>(1846.3 - 2391.8)                    | 17.5<br>(15.4 - 19.8)                                      | 1<br>(0.9 - 1.1)                                            | 10584.9<br>(8634.6 - 12492.9)                   | 762.5<br>(599.6 - 931.6)                         | 4<br>(3.3 - 4.7)                                             | 0.3<br>(0.2 - 0.3)                                            |
| Slovakia                         | 130554.1<br>(118922.2 - 142593.4)             | 5257.3<br>(4766 - 5748.4)                      | 38.5<br>(35 - 41.9)                                        | 1.7<br>(1.5 - 1.8)                                          | 29231.3<br>(24821.3 - 33694.6)                  | 1183.2<br>(968.7 - 1413.5)                       | 7<br>(6 - 8.1)                                               | 0.3<br>(0.2 - 0.3)                                            |
| Slovenia                         | 36090.2<br>(32507.7 - 39897.1)                | 1691.5<br>(1521.8 - 1879.1)                    | 23.2<br>(20.9 - 25.6)                                      | 1.1<br>(1 - 1.2)                                            | 11032.1<br>(9306.8 - 12990.1)                   | 611.3<br>(483.2 - 768.8)                         | 6.2<br>(5.2 - 7.3)                                           | 0.3<br>(0.2 - 0.3)                                            |

| Country or Territory | Male Smoking Attributable DALYs 2015 (95% UI) | Male Smoking Attributable Deaths 2015 (95% UI) | Male Smoking Attributable DALY Rate 2015, per 100 (95% UI) | Male Smoking Attributable Death Rate 2015, per 100 (95% UI) | Female Smoking Attributable DALYs 2015 (95% UI) | Female Smoking Attributable Deaths 2015 (95% UI) | Female Smoking Attributable DALY Rate 2015, per 100 (95% UI) | Female Smoking Attributable Death Rate 2015, per 100 (95% UI) |
|----------------------|-----------------------------------------------|------------------------------------------------|------------------------------------------------------------|-------------------------------------------------------------|-------------------------------------------------|--------------------------------------------------|--------------------------------------------------------------|---------------------------------------------------------------|
| Solomon Islands      | 13339<br>(7729.7 - 21423.4)                   | 413.6<br>(244.6 - 656.3)                       | 81<br>(49 - 126.6)                                         | 3<br>(2 - 4.7)                                              | 5741.5<br>(2931.9 - 10085)                      | 181<br>(89.7 - 314)                              | 35.6<br>(18.3 - 61)                                          | 1.4<br>(0.7 - 2.3)                                            |
| Somalia              | 83031.3<br>(23769 - 240900.3)                 | 2574.9<br>(721.9 - 7135.1)                     | 34.8<br>(10.6 - 95.2)                                      | 1.3<br>(0.4 - 3.2)                                          | 16834.9<br>(4027.2 - 56540.2)                   | 625.2<br>(153.4 - 1891.6)                        | 7.2<br>(1.9 - 22.5)                                          | 0.3<br>(0.1 - 0.8)                                            |
| South Africa         | 888779.3<br>(759187.1 - 1033806.1)            | 32080.3<br>(27363.8 - 37008.8)                 | 52.5<br>(45.1 - 60.5)                                      | 2.2<br>(1.9 - 2.6)                                          | 350249.5<br>(287342.3 - 425409.9)               | 15362.9<br>(12551.4 - 18759.3)                   | 16.5<br>(13.5 - 20)                                          | 0.8<br>(0.6 - 0.9)                                            |
| South Korea          | 711734.8<br>(627420.6 - 800157.2)             | 34574.6<br>(30615.8 - 38560)                   | 23.6<br>(20.9 - 26.4)                                      | 1.3<br>(1.1 - 1.4)                                          | 126413.1<br>(100243.4 - 153392.2)               | 8808.3<br>(6871.5 - 10911.6)                     | 3.3<br>(2.6 - 4)                                             | 0.2<br>(0.2 - 0.3)                                            |
| South Sudan          | 87261.6<br>(27489.5 - 287996.6)               | 2776.7<br>(841.5 - 8987.1)                     | 28.5<br>(9.4 - 91.3)                                       | 1.1<br>(0.4 - 3.2)                                          | 19315.1<br>(4286 - 78225.6)                     | 720.6<br>(164.1 - 2644.4)                        | 6.4<br>(1.6 - 24.5)                                          | 0.3<br>(0.1 - 0.9)                                            |
| Spain                | 864544.6<br>(811884.8 - 921016.1)             | 46569.7<br>(42980.8 - 50205.4)                 | 25.5<br>(23.9 - 27.2)                                      | 1.3<br>(1.2 - 1.4)                                          | 158848.6<br>(132217.4 - 186128.9)               | 6608.3<br>(4078.4 - 9707.9)                      | 4.5<br>(3.9 - 5.1)                                           | 0.1<br>(0.1 - 0.2)                                            |
| Sri Lanka            | 212411.3<br>(144311.9 - 295003.8)             | 7582.1<br>(5072.5 - 10731)                     | 21<br>(14.4 - 29.1)                                        | 0.8<br>(0.6 - 1.2)                                          | 10741.3<br>(5077.5 - 22410.8)                   | 425.2<br>(195 - 850.9)                           | 0.9<br>(0.4 - 1.9)                                           | 0<br>(0 - 0.1)                                                |
| Sudan                | 99636.7<br>(48966.8 - 182443.3)               | 3534.6<br>(1720 - 6438.3)                      | 10.5<br>(5.3 - 18.8)                                       | 0.5<br>(0.2 - 0.8)                                          | 32677.1<br>(2367.1 - 79099.5)                   | 994.5<br>(64.9 - 2479.9)                         | 2.9<br>(0.2 - 7.2)                                           | 0.1<br>(0 - 0.3)                                              |
| Suriname             | 6945.7<br>(5524 - 8374.1)                     | 247.6<br>(192.4 - 305.1)                       | 30.3<br>(24 - 36.7)                                        | 1.3<br>(1 - 1.6)                                            | 2231.7<br>(1670.4 - 2955.4)                     | 91.7<br>(66.6 - 127.1)                           | 8.9<br>(6.8 - 11.8)                                          | 0.4<br>(0.3 - 0.6)                                            |
| Swaziland            | 18879.8<br>(4703 - 39706.8)                   | 668.2<br>(167.6 - 1350.6)                      | 70<br>(18.1 - 142.2)                                       | 2.9<br>(0.8 - 5.5)                                          | 5975<br>(919.1 - 17610.9)                       | 242.8<br>(43.2 - 668.8)                          | 18.9<br>(3.2 - 53.2)                                         | 0.9<br>(0.2 - 2.2)                                            |
| Sweden               | 90735.1<br>(82001.7 - 100261.1)               | 5071.4<br>(4587.2 - 5627.2)                    | 11.7<br>(10.6 - 13)                                        | 0.6<br>(0.6 - 0.7)                                          | 86262.6<br>(78974.8 - 93507.7)                  | 5384.6<br>(4876.1 - 5915.5)                      | 10<br>(9.1 - 10.9)                                           | 0.5<br>(0.5 - 0.6)                                            |
| Switzerland          | 104519.4<br>(94834.2 - 115423.5)              | 5622<br>(5033.1 - 6266.4)                      | 17.3<br>(15.7 - 19.1)                                      | 0.9<br>(0.8 - 1)                                            | 47446.1<br>(42172.9 - 52678.6)                  | 2796.3<br>(2369.8 - 3271.4)                      | 7<br>(6.2 - 7.7)                                             | 0.3<br>(0.3 - 0.4)                                            |
| Syria                | 152435.5<br>(113387 - 191215.8)               | 5236.5<br>(3803.9 - 6658.9)                    | 28.6<br>(21.1 - 35.9)                                      | 1.2<br>(0.8 - 1.5)                                          | 56119.6<br>(37544.4 - 77240.8)                  | 2096.8<br>(1355.6 - 2934.5)                      | 10<br>(6.7 - 13.8)                                           | 0.4<br>(0.3 - 0.6)                                            |
| Taiwan               | 466821.7<br>(362955.8 - 581950.8)             | 22732.9<br>(17720.6 - 28013.6)                 | 30.8<br>(23.9 - 38.4)                                      | 1.5<br>(1.2 - 1.8)                                          | 122742.2<br>(90740.7 - 160887.9)                | 6468.6<br>(4664.6 - 8641)                        | 7.6<br>(5.5 - 9.9)                                           | 0.4<br>(0.3 - 0.5)                                            |
| Tajikistan           | 61704.6<br>(51324.9 - 74357.4)                | 1957.7<br>(1611.3 - 2386.3)                    | 25.3<br>(20.9 - 30.6)                                      | 1<br>(0.8 - 1.2)                                            | 4407.5<br>(2116.3 - 7217.3)                     | 124<br>(61.4 - 204.6)                            | 1.7<br>(0.8 - 2.8)                                           | 0.1<br>(0 - 0.1)                                              |
| Tanzania             | 274874.9<br>(131129.9 - 626488.3)             | 9154.4<br>(4281.8 - 20598.2)                   | 23.5<br>(11.5 - 52.8)                                      | 0.9<br>(0.4 - 2)                                            | 40882.3<br>(13964.4 - 125523.5)                 | 1607.6<br>(547.5 - 4771.5)                       | 3.7<br>(1.3 - 10.8)                                          | 0.2<br>(0.1 - 0.5)                                            |
| Thailand             | 1895502.5<br>(1421336.1 - 2362788)            | 81399.6<br>(60408.7 - 98011.3)                 | 49.4<br>(37.5 - 60.6)                                      | 2.4<br>(1.8 - 2.8)                                          | 382285.8<br>(286869.7 - 491831.3)               | 19069.6<br>(14334.6 - 24379.7)                   | 8.9<br>(6.7 - 11.4)                                          | 0.5<br>(0.4 - 0.6)                                            |
| The Bahamas          | 3212.3<br>(2525.3 - 3961)                     | 115.1<br>(93 - 141.2)                          | 17.3<br>(14 - 21.1)                                        | 0.7<br>(0.6 - 0.9)                                          | 1027.8<br>(744.9 - 1349.9)                      | 42.1<br>(30.1 - 56.9)                            | 4.8<br>(3.5 - 6.3)                                           | 0.2<br>(0.1 - 0.3)                                            |
| The Gambia           | 10621.1<br>(5941.8 - 19615.1)                 | 332.2<br>(182.6 - 617.8)                       | 25.7<br>(14.7 - 46.3)                                      | 1<br>(0.6 - 1.9)                                            | 899<br>(245 - 2267.5)                           | 34.8<br>(8.4 - 90.2)                             | 2.7<br>(0.7 - 6.8)                                           | 0.1<br>(0 - 0.3)                                              |
| Timor-Leste          | 9817.3<br>(6520.7 - 14097.4)                  | 340.4<br>(218.3 - 496.2)                       | 29.8<br>(20 - 42.3)                                        | 1.2<br>(0.8 - 1.7)                                          | 4579.2<br>(2790.2 - 7102.3)                     | 180.4<br>(107.4 - 290.2)                         | 13.8<br>(8.4 - 21.1)                                         | 0.6<br>(0.4 - 1)                                              |
| Togo                 | 50449<br>(18836.7 - 97758.1)                  | 1678.6<br>(622.1 - 3206.7)                     | 32.7<br>(12.8 - 61.3)                                      | 1.3<br>(0.5 - 2.4)                                          | 8559.3<br>(2302.6 - 22794.3)                    | 329.6<br>(80.9 - 874.6)                          | 5.4<br>(1.5 - 14)                                            | 0.2<br>(0.1 - 0.6)                                            |
| Tonga                | 2199.5<br>(1667.9 - 2901.5)                   | 85.8<br>(66.2 - 108.9)                         | 68.4<br>(52.4 - 88.4)                                      | 3<br>(2.3 - 3.7)                                            | 597.3<br>(439.3 - 793.5)                        | 30.6<br>(21.9 - 39.9)                            | 15.4<br>(11.3 - 20.3)                                        | 0.8<br>(0.6 - 1)                                              |
| Trinidad and Tobago  | 22503.6<br>(17849.4 - 27068.8)                | 816.1<br>(648.3 - 994.2)                       | 31.5<br>(25.1 - 37.9)                                      | 1.3<br>(1 - 1.6)                                            | 2909.4<br>(2160.1 - 3840.6)                     | 98.9<br>(68.1 - 136.2)                           | 3.7<br>(2.7 - 4.8)                                           | 0.1<br>(0.1 - 0.2)                                            |
| Tunisia              | 209837.6<br>(153443.7 - 279340.9)             | 8490.8<br>(6044.4 - 11480.9)                   | 42.2<br>(30.9 - 56.1)                                      | 1.9<br>(1.4 - 2.6)                                          | 20120<br>(10686 - 32353.4)                      | 1053.1<br>(505.1 - 1742.6)                       | 3.8<br>(2 - 6.1)                                             | 0.2<br>(0.1 - 0.4)                                            |
| Turkey               | 1238143.1<br>(1118149.1 - 1369707.6)          | 47751.9<br>(43166.7 - 53354)                   | 38.1<br>(34.5 - 42.1)                                      | 1.7<br>(1.5 - 1.9)                                          | 240818.6<br>(201083.1 - 282856.1)               | 8390.5<br>(6325.7 - 10618.5)                     | 6.1<br>(5.1 - 7.2)                                           | 0.2<br>(0.2 - 0.3)                                            |
| Turkmenistan         | 59722.1<br>(49848.9 - 69650.3)                | 1829.1<br>(1532.8 - 2153.7)                    | 31.6<br>(26.4 - 37)                                        | 1.2<br>(0.9 - 1.4)                                          | 4631.2<br>(3019.2 - 6362.7)                     | 136.7<br>(92.2 - 185.2)                          | 2<br>(1.3 - 2.8)                                             | 0.1<br>(0 - 0.1)                                              |

| Country or Territory | Male Smoking Attributable DALYs 2015 (95% UI) | Male Smoking Attributable Deaths 2015 (95% UI) | Male Smoking Attributable DALY Rate 2015, per 100 (95% UI) | Male Smoking Attributable Death Rate 2015, per 100 (95% UI) | Female Smoking Attributable DALYs 2015 (95% UI) | Female Smoking Attributable Deaths 2015 (95% UI) | Female Smoking Attributable DALY Rate 2015, per 100 (95% UI) | Female Smoking Attributable Death Rate 2015, per 100 (95% UI) |
|----------------------|-----------------------------------------------|------------------------------------------------|------------------------------------------------------------|-------------------------------------------------------------|-------------------------------------------------|--------------------------------------------------|--------------------------------------------------------------|---------------------------------------------------------------|
| Uganda               | 164371.8<br>(51761.5 - 370578.6)              | 5001.4<br>(1487.6 - 11093.8)                   | 22.7<br>(7.1 - 49.9)                                       | 0.8<br>(0.2 - 1.8)                                          | 53973.1<br>(11634.1 - 151282.9)                 | 1898.1<br>(411.1 - 5263.2)                       | 7.5<br>(1.7 - 20.5)                                          | 0.3<br>(0.1 - 0.8)                                            |
| Ukraine              | 2071332.9<br>(1847358.1 - 2291530)            | 84003.9<br>(74205.7 - 94034.9)                 | 73.8<br>(65.9 - 81.6)                                      | 3<br>(2.7 - 3.4)                                            | 261369.4<br>(211072.4 - 309769.7)               | 10153<br>(7913.1 - 12882.8)                      | 6.9<br>(5.6 - 8.1)                                           | 0.2<br>(0.2 - 0.3)                                            |
| United Arab Emirates | 81172.7<br>(50942.2 - 123374.5)               | 2002.2<br>(1244 - 3062.6)                      | 16.5<br>(11.2 - 23.9)                                      | 0.7<br>(0.5 - 1)                                            | 5039.7<br>(2309.2 - 8710)                       | 129.6<br>(61.4 - 222.8)                          | 3.9<br>(2.2 - 6.4)                                           | 0.2<br>(0.1 - 0.3)                                            |
| United Kingdom       | 1061743.1<br>(996403.1 - 1138461.8)           | 60642.5<br>(57036.8 - 64702.4)                 | 23.1<br>(21.6 - 24.8)                                      | 1.2<br>(1.2 - 1.3)                                          | 761888.9<br>(719594.3 - 806410.5)               | 52514<br>(49832.5 - 55434.6)                     | 14.2<br>(13.3 - 15)                                          | 0.8<br>(0.8 - 0.8)                                            |
| United States        | 5616730<br>(5251296 - 5975033.5)              | 262287.6<br>(246692.1 - 277053.7)              | 27.2<br>(25.5 - 29)                                        | 1.3<br>(1.2 - 1.3)                                          | 4007570.5<br>(3807703 - 4213899.5)              | 209741.8<br>(201028.8 - 219551)                  | 17<br>(16.1 - 17.9)                                          | 0.8<br>(0.8 - 0.8)                                            |
| Uruguay              | 79566.3<br>(74157.6 - 85456.4)                | 3908.3<br>(3634.5 - 4215.6)                    | 42.7<br>(39.8 - 45.9)                                      | 2.1<br>(1.9 - 2.2)                                          | 25566.8<br>(22620.2 - 28495.2)                  | 1457.2<br>(1247.4 - 1685.8)                      | 10.7<br>(9.5 - 12)                                           | 0.5<br>(0.4 - 0.5)                                            |
| Uzbekistan           | 334615.3<br>(282447.8 - 390872.5)             | 10867.8<br>(9075.2 - 12814)                    | 32.5<br>(27.3 - 38.2)                                      | 1.2<br>(1 - 1.5)                                            | 65985.8<br>(47822.8 - 86248.6)                  | 2314.4<br>(1612.2 - 3150.5)                      | 5.6<br>(4 - 7.3)                                             | 0.2<br>(0.1 - 0.3)                                            |
| Vanuatu              | 5685.9<br>(3576.5 - 8911.4)                   | 186.9<br>(122.7 - 282.7)                       | 69<br>(45.1 - 104)                                         | 2.8<br>(1.9 - 4)                                            | 1305.6<br>(663.6 - 2384.4)                      | 45.7<br>(24.1 - 80.4)                            | 16.4<br>(8.8 - 28.7)                                         | 0.7<br>(0.4 - 1.2)                                            |
| Venezuela            | 277664.3<br>(219312 - 341340.8)               | 10732.6<br>(8512.2 - 13037.8)                  | 23.7<br>(18.9 - 28.8)                                      | 1.1<br>(0.9 - 1.3)                                          | 135507.6<br>(104807.4 - 170189.5)               | 6469.2<br>(4932.6 - 8231.5)                      | 10.5<br>(8.1 - 13.2)                                         | 0.6<br>(0.4 - 0.7)                                            |
| Vietnam              | 1961614.8<br>(1279403.3 - 2786501.3)          | 79441.1<br>(53283.5 - 107920.7)                | 55.5<br>(37.6 - 75.4)                                      | 2.6<br>(1.8 - 3.4)                                          | 489263.1<br>(285319.9 - 689464.2)               | 30387.9<br>(19300.9 - 41284.5)                   | 10.6<br>(6.1 - 15.1)                                         | 0.6<br>(0.4 - 0.8)                                            |
| Virgin Islands, U.S. | 1473.3<br>(1198.8 - 1761.5)                   | 64.7<br>(53 - 77.3)                            | 19.6<br>(16 - 23.4)                                        | 0.9<br>(0.7 - 1)                                            | 575.1<br>(471.9 - 700.9)                        | 31.4<br>(26 - 38.4)                              | 6.4<br>(5.2 - 7.8)                                           | 0.3<br>(0.3 - 0.4)                                            |
| Yemen                | 244444.5<br>(129498.2 - 424792.5)             | 7799.7<br>(4082.6 - 13657.5)                   | 40.8<br>(22.3 - 70.1)                                      | 1.6<br>(0.9 - 2.7)                                          | 137127.8<br>(61755.4 - 267606.9)                | 4388.1<br>(1932.2 - 8703.9)                      | 21.1<br>(9.5 - 41.2)                                         | 0.8<br>(0.3 - 1.5)                                            |
| Zambia               | 147954.4<br>(62210.1 - 254641.9)              | 4996.7<br>(2143.9 - 8386)                      | 48.9<br>(21.2 - 82.1)                                      | 2<br>(0.9 - 3.2)                                            | 28822.1<br>(12347 - 60605.1)                    | 1298.7<br>(565.6 - 2591.4)                       | 9.7<br>(4.3 - 19.5)                                          | 0.5<br>(0.2 - 0.9)                                            |
| Zimbabwe             | 161475.1<br>(69130.7 - 286960.5)              | 5959.2<br>(2653.9 - 10195)                     | 54.9<br>(24.6 - 95)                                        | 2.4<br>(1.2 - 4)                                            | 28817<br>(9671.9 - 71444.2)                     | 1561.4<br>(566.3 - 3593.6)                       | 10.5<br>(3.7 - 25.2)                                         | 0.6<br>(0.2 - 1.4)                                            |
